# Supplementary material for: Iridium(iii)-catalyzed β-trifluoromethyl enone carbonyl-directed regioselective ortho-C(sp2)–H olefination
Source: Royal Society of Chemistry journal article supplement (doi:10.1039/d3ob02024j), 2024-01-01

## Electronic Supporting Information for Iridium(III)-Catalyzed $\beta$ -Trifluoromethyl Enone Carbonyl Directed Regio-Selective *Ortho*-C(sp<sup>2</sup>)-H Olefination

Haritha Sindhe,<sup>a</sup> Akshay Kamble,<sup>a</sup> Malladi Mounika Reddy,<sup>b</sup> Amardeep Singh,<sup>b</sup> Satyasheel Sharma<sup>b\*</sup>

<sup>a</sup>Department of Medicinal Chemistry, National Institute of Pharmaceutical Education and Research, Ahmedabad (NIPER-A), Gandhinagar, Gujarat – 382355, INDIA

<sup>b</sup>Department of Natural Products, National Institute of Pharmaceutical Education and Research, Ahmedabad (NIPER-A), Gandhinagar, Gujarat – 382355, INDIA

\*Corresponding author: [sharma.satyasheel@gmail.com](mailto:sharma.satyasheel@gmail.com); Tel: +91 7966745555; fax: +91 7966745560

### Table of contents

| <b>Entry</b> | <b>Content</b>                                                                                                                                                                                                                                              | <b>Page No.</b> |
|--------------|-------------------------------------------------------------------------------------------------------------------------------------------------------------------------------------------------------------------------------------------------------------|-----------------|
| 1            | General Information                                                                                                                                                                                                                                         | S2              |
| 2.           | Experimental Details                                                                                                                                                                                                                                        | S2              |
| 2.1.         | Synthesis of $\beta$ -Substituted Enone ( <b>1p</b> and <b>1q</b> )                                                                                                                                                                                         | S2-S3           |
| 2.2.         | Synthesis of Acrylates ( <b>2</b> )                                                                                                                                                                                                                         | S3              |
| 3.           | Complete optimization for <i>ortho</i> -olefinated product ( <b>3aa</b> )                                                                                                                                                                                   | S4-S5           |
| 4.           | General procedure for C-H olefination and characterization data of compounds ( <b>3aa-3ra</b> , <b>3ab-3ao</b> )                                                                                                                                            | S5-S17          |
| 5.           | Procedure for Scale-Up ( <b>3aa</b> )                                                                                                                                                                                                                       | S17             |
| 6.           | Procedure for synthetic diversification                                                                                                                                                                                                                     | S17-S18         |
| 7.           | Mechanistic Studies: H/D Exchange experiment                                                                                                                                                                                                                | S19             |
| 7.1          | Mechanistic Studies: Intermolecular competitive experiment                                                                                                                                                                                                  | S19             |
| 8.           | References                                                                                                                                                                                                                                                  | S20             |
| 9.           | <sup>1</sup> H NMR, <sup>13</sup> C and <sup>19</sup> F NMR spectral copies of all Products ( <b>3aa-3ra</b> , <b>3ab-3ao</b> , <b>2aa</b> , <b>5aa</b> , <b>7aa</b> , <b>deuterio-1a</b> , <b>1p</b> , <b>1q</b> ) and NOE spectra for compound <b>3ao</b> | S21-S77         |
|              |                                                                                                                                                                                                                                                             |                 |

## 1. General Information

All  $^1\text{H}$  and  $^{13}\text{C}$  NMR spectra were recorded on a Bruker 500 MHz spectrometer in  $\text{CDCl}_3$ ,  $\text{DMSO}-d_6$ , with TMS (tetramethyl silane) as an internal standard.  $^{19}\text{F}$  NMR was also recorded on the same instrument. Data are reported as follows: Chemical shift ( $\delta = \text{ppm}$ ), multiplicity (s = singlet, d = doublet, dd = doublet of doublet, t = triplet, q = quartet, p = pentet, dq = doublet of quartet, hept = heptet, m = multiplet), Coupling constants ( $J$ ), are reported in hertz (Hz). High-resolution Mass Spectrometry (HRMS) was done on Agilent Q-TOF LC/MS. Melting point was recorded on Buchi M-560. Materials were purchased from Sigma Aldrich, TCI, and used without any further purification. The starting materials **1a-1o**,<sup>1</sup> **1p-1q**<sup>2</sup> were prepared as reported in previous literature. Column chromatography was performed on silica gel (230-400 mesh) using ethyl acetate and hexane as mobile phase.

## 2. Experimental Details

### 2.1. Synthesis of $\beta$ -Substituted Enone (**1p** and **1q**)<sup>2</sup>

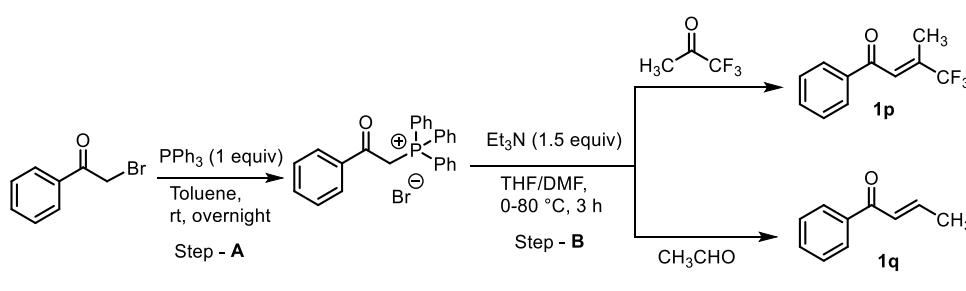

**Scheme 2.** Synthesis of  $\beta$ -Substituted Enone

**Step - A:** To a solution of aryl-2-bromoethanone (1.0 equiv, 10 mmol) in toluene (15 mL) was added a solution of triphenylphosphine ( $\text{PPh}_3$ ) (1.0 equiv, 10 mmol) in toluene (15 mL) dropwise for 10 min. Then, the reaction mixture was stirred at room temperature overnight, and the resulting mixture was concentrated under reduced pressure. The resulting precipitate was washed with  $\text{Et}_2\text{O}$ . Then phosphonium bromide was obtained in quantitative yield and was used without purification.

**Step - B:** To an oven dried round bottomed flask was added triphenylphosphonium bromide salt (7.5 mmol) and triethylamine (759 mg, 7.5 mmol) in THF (20 mL), followed by the addition of a solution of a trifluoromethyl ketone/acetaldehyde (5.0 mmol) in DMF (1.6 mL) at 0 °C in an ice bath. The mixture was then stirred for 15 min at this temperature. Warming to room temperature, the solution was heated further stirred at 80 °C for 3 h. Then, the solution was quenched with saturated aqueous  $\text{NH}_4\text{Cl}$  solution and extracted with ethyl acetate. The organic extract was dried over  $\text{Na}_2\text{SO}_4$  and concentrated under reduced pressure. Further the

residue was purified by silica gel (230-400 mesh size) column chromatography (Hexane/ethyl acetate: 100:1) to give the pure  $\beta$ -Substituted Enone **1p** in 40% and **1q** in 35% yield.

**(E)-4,4,4-Trifluoro-3-methyl-1-phenylbut-2-en-1-one (1p):**

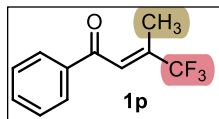

Yellow liquid;  $^1\text{H NMR}$  (500 MHz,  $\text{CDCl}_3$ )  $\delta$  7.94 – 7.92 (m, 2H), 7.63 – 7.59 (m, 1H), 7.51 (tt,  $J = 7.5, 1.7$  Hz, 2H), 7.23 (hept,  $J = 1.5$  Hz, 1H), 2.16 (d,  $J = 1.6$  Hz, 3H);  $^{13}\text{C NMR}$  (125 MHz,  $\text{CDCl}_3$ )  $\delta$  191.2, 139.4 (q,  $^2J_{\text{C-F}} = 30.1$  Hz), 137.3, 133.9, 129.0, 128.7, 125.9 (q,  $^3J_{\text{C-F}} = 5.4$  Hz), 124.6 (q,  $^1J_{\text{C-F}} = 272.7$  Hz), 12.9;  $^{19}\text{F NMR}$  (470 MHz,  $\text{CDCl}_3$ )  $\delta$  -70.8.

**(E)-1-Phenylbut-2-en-1-one (1q):**

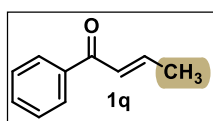

Yellow liquid;  $^1\text{H NMR}$  (500 MHz,  $\text{CDCl}_3$ )  $\delta$  7.93 – 7.91 (m, 2H), 7.57 – 7.53 (m, 1H), 7.48 – 7.45 (m, 2H), 7.08 (dq,  $J = 15.4, 6.9$  Hz, 1H), 6.91 (dq,  $J = 15.3, 1.6$  Hz, 1H), 2.01 (dd,  $J = 6.9, 1.5$  Hz, 3H);  $^{13}\text{C NMR}$  (125 MHz,  $\text{CDCl}_3$ )  $\delta$  190.8, 145.0, 137.9, 132.5, 128.5, 127.5, 18.6.

**2.2. Synthesis of Acrylates (2):**

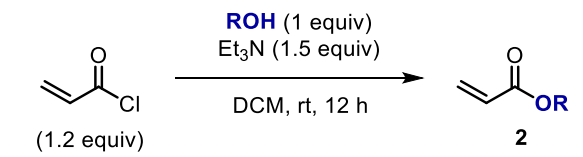

**Scheme 3.** Synthesis of Acrylates

Alcohol (3 mmol, 1 equiv) was mixed with  $\text{Et}_3\text{N}$  (1.5 equiv) in dry  $\text{CH}_2\text{Cl}_2$  (10 mL) and cooled to 0 °C in an ice-water bath. Then acryloyl chloride (1.2 equiv) was added dropwise. The mixture was warmed to room temperature and stirred overnight. The solvent was removed under reduced pressure and the residue was purified by silica gel column chromatography to get the desired acrylates 80-95% yield.

### 3. Complete Optimization for Ortho-olefinated product (3aa):

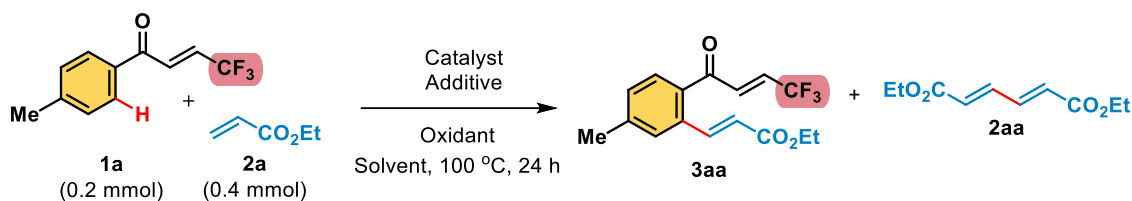

Scheme 4. Complete optimization for ortho-olefinated product 3aa

| Entry           | Catalyst (mol%)                                            | Additive (mol%)         | Oxidant (x equiv)                                | Solvent     | Yield (%) |        |
|-----------------|------------------------------------------------------------|-------------------------|--------------------------------------------------|-------------|-----------|--------|
|                 |                                                            |                         |                                                  |             | 3aa       | 2aa    |
| 1               | [RhCp*Cl <sub>2</sub> ] <sub>2</sub> (2.5)                 | AgSbF <sub>6</sub> (10) | Cu(OAc) <sub>2</sub> .H <sub>2</sub> O (1)       | DCE         | 45        | 10     |
| 2 <sup>a</sup>  | [RhCp*Cl <sub>2</sub> ] <sub>2</sub> (2.5)                 | AgSbF <sub>6</sub> (10) | Cu(OAc) <sub>2</sub> .H <sub>2</sub> O (1)       | DCE         | 53        | 17     |
| 3 <sup>a</sup>  | [RhCp*Cl <sub>2</sub> ] <sub>2</sub> (2.5)                 | AgSbF <sub>6</sub> (10) | Cu(OAc) <sub>2</sub> .H <sub>2</sub> O (2)       | DCE         | 58        | 20     |
| 4               | [RhCp*Cl <sub>2</sub> ] <sub>2</sub> (2.5)                 | AgSbF <sub>6</sub> (10) | -                                                | DCE         | trace     | -      |
| 5 <sup>b</sup>  | [RhCp*Cl <sub>2</sub> ] <sub>2</sub> (2.5)                 | -                       | Cu(OAc) <sub>2</sub> .H <sub>2</sub> O (1)       | DCE         | -         | -      |
| 6               | [RhCp*Cl <sub>2</sub> ] <sub>2</sub> (2.5)                 | AgSbF <sub>6</sub> (10) | AgOAc (1)                                        | DCE         | 52        | 7      |
| 7               | [RhCp*Cl <sub>2</sub> ] <sub>2</sub> (2.5)                 | AgSbF <sub>6</sub> (10) | Ag <sub>2</sub> CO <sub>3</sub> (1)              | DCE         | 55        | 5      |
| 8               | [RhCp*Cl <sub>2</sub> ] <sub>2</sub> (2.5)                 | AgSbF <sub>6</sub> (10) | CuCl (1)                                         | DCE         | -         | -      |
| 9               | [RhCp*Cl <sub>2</sub> ] <sub>2</sub> (2.5)                 | AgSbF <sub>6</sub> (10) | CuBr (1)                                         | DCE         | -         | -      |
| 10              | [RhCp*Cl <sub>2</sub> ] <sub>2</sub> (2.5)                 | AgSbF <sub>6</sub> (10) | KOAc (1)                                         | DCE         | -         | -      |
| 11              | [RhCp*Cl <sub>2</sub> ] <sub>2</sub> (2.5)                 | AgSbF <sub>6</sub> (10) | NaOAc (1)                                        | DCE         | -         | -      |
| 12              | [RhCp*Cl <sub>2</sub> ] <sub>2</sub> (2.5)                 | AgSbF <sub>6</sub> (10) | K <sub>2</sub> S <sub>2</sub> O <sub>8</sub> (1) | DCE         | -         | -      |
| 13              | [RhCp*Cl <sub>2</sub> ] <sub>2</sub> (2.5)                 | AgSbF <sub>6</sub> (10) | Cu(OAc) <sub>2</sub> .H <sub>2</sub> O (1)       | DCM         | 60        | 10     |
| 14              | [RhCp*Cl <sub>2</sub> ] <sub>2</sub> (2.5)                 | AgSbF <sub>6</sub> (10) | Cu(OAc) <sub>2</sub> .H <sub>2</sub> O (1)       | THF         | 25        | -      |
| 15              | [RhCp*Cl <sub>2</sub> ] <sub>2</sub> (2.5)                 | AgSbF <sub>6</sub> (10) | Cu(OAc) <sub>2</sub> .H <sub>2</sub> O (1)       | EtOAc       | 27        | -      |
| 16              | [RhCp*Cl <sub>2</sub> ] <sub>2</sub> (2.5)                 | AgSbF <sub>6</sub> (10) | Cu(OAc) <sub>2</sub> .H <sub>2</sub> O (1)       | 1,4-dioxane | 44        | 10     |
| 17              | [RhCp*Cl <sub>2</sub> ] <sub>2</sub> (2.5)                 | AgSbF <sub>6</sub> (10) | Cu(OAc) <sub>2</sub> .H <sub>2</sub> O (1)       | TFE         | 21        | traces |
| 18              | [RhCp*Cl <sub>2</sub> ] <sub>2</sub> (2.5)                 | AgSbF <sub>6</sub> (10) | Cu(OAc) <sub>2</sub> .H <sub>2</sub> O (1)       | Xylene      | -         | -      |
| 19              | [RhCp*Cl <sub>2</sub> ] <sub>2</sub> (2.5)                 | AgSbF <sub>6</sub> (10) | Cu(OAc) <sub>2</sub> .H <sub>2</sub> O (1)       | Toluene     | -         | -      |
| 20              | [RhCp*Cl <sub>2</sub> ] <sub>2</sub> (2.5)                 | AgSbF <sub>6</sub> (10) | Cu(OAc) <sub>2</sub> .H <sub>2</sub> O (1)       | DMSO        | -         | -      |
| 21              | [RhCp*Cl <sub>2</sub> ] <sub>2</sub> (2.5)                 | AgSbF <sub>6</sub> (10) | Cu(OAc) <sub>2</sub> .H <sub>2</sub> O (1)       | CAN         | -         | -      |
| 22              | [RhCp*Cl <sub>2</sub> ] <sub>2</sub> (2.5)                 | AgSbF <sub>6</sub> (10) | Cu(OAc) <sub>2</sub> .H <sub>2</sub> O (1)       | DMF         | -         | -      |
| 23              | [Ru( <i>p</i> -cymene)Cl <sub>2</sub> ] <sub>2</sub> (2.5) | AgSbF <sub>6</sub> (10) | Cu(OAc) <sub>2</sub> .H <sub>2</sub> O (1)       | DCE         | 40        | 10     |
| 24              | [Ru( <i>p</i> -cymene)Cl <sub>2</sub> ] <sub>2</sub> (2.5) | AgSbF <sub>6</sub> (10) | Ag <sub>2</sub> CO <sub>3</sub> (1)              | DCE         | 46        | 8      |
| 25              | [Ru( <i>p</i> -cymene)Cl <sub>2</sub> ] <sub>2</sub> (5)   | AgSbF <sub>6</sub> (20) | Ag <sub>2</sub> CO <sub>3</sub> (1)              | DCE         | 52        | 15     |
| 26              | [IrCp*Cl <sub>2</sub> ] <sub>2</sub> (2.5)                 | AgSbF <sub>6</sub> (10) | Cu(OAc) <sub>2</sub> .H <sub>2</sub> O (1)       | DCE         | 60        | 5      |
| 27              | [IrCp*Cl <sub>2</sub> ] <sub>2</sub> (2.5)                 | AgSbF <sub>6</sub> (10) | Ag <sub>2</sub> CO <sub>3</sub> (1)              | DCE         | 52        | -      |
| 28              | [IrCp*Cl <sub>2</sub> ] <sub>2</sub> (2.5)                 | AgSbF <sub>6</sub> (10) | Ag <sub>2</sub> CO <sub>3</sub> (1)              | EtOAc       | 21        | -      |
| 29              | [IrCp*Cl <sub>2</sub> ] <sub>2</sub> (2.5)                 | AgSbF <sub>6</sub> (10) | Ag <sub>2</sub> CO <sub>3</sub> (1)              | 1,4-dioxane | 50        | -      |
| 30              | [IrCp*Cl <sub>2</sub> ] <sub>2</sub> (2.5)                 | AgSbF <sub>6</sub> (10) | Ag <sub>2</sub> CO <sub>3</sub> (1)              | Toluene     | -         | -      |
| 31              | [IrCp*Cl <sub>2</sub> ] <sub>2</sub> (2.5)                 | AgSbF <sub>6</sub> (10) | Ag <sub>2</sub> CO <sub>3</sub> (1)              | MeCN        | -         | -      |
| 32              | [IrCp*Cl <sub>2</sub> ] <sub>2</sub> (2.5)                 | AgSbF <sub>6</sub> (10) | Ag <sub>2</sub> CO <sub>3</sub> (1)              | TFE         | 30        | -      |
| <b>33</b>       | <b>[IrCp*Cl<sub>2</sub>]<sub>2</sub> (2.5)</b>             | AgSbF <sub>6</sub> (10) | <b>Ag<sub>2</sub>CO<sub>3</sub> (1)</b>          | <b>HFIP</b> | <b>82</b> | -      |
| 34 <sup>c</sup> | [IrCp*Cl <sub>2</sub> ] <sub>2</sub> (2.5)                 | AgSbF <sub>6</sub> (10) | Ag <sub>2</sub> CO <sub>3</sub> (1)              | HFIP        | -         | 15     |
| 35              | [IrCp*Cl <sub>2</sub> ] <sub>2</sub> (1)                   | AgSbF <sub>6</sub> (4)  | Ag <sub>2</sub> CO <sub>3</sub> (1)              | HFIP        | 40        | -      |

|    |                                                            |                         |                                                  |      |    |   |
|----|------------------------------------------------------------|-------------------------|--------------------------------------------------|------|----|---|
| 36 | [IrCp*Cl <sub>2</sub> ] <sub>2</sub> (5)                   | AgSbF <sub>6</sub> (20) | Ag <sub>2</sub> CO <sub>3</sub> (1)              | HFIP | 86 | - |
| 37 | [IrCp*Cl <sub>2</sub> ] <sub>2</sub> (2.5)                 | AgNTf <sub>2</sub> (10) | Ag <sub>2</sub> CO <sub>3</sub> (1)              | HFIP | 70 | - |
| 38 | [IrCp*Cl <sub>2</sub> ] <sub>2</sub> (2.5)                 | AgPF <sub>6</sub> (10)  | Ag <sub>2</sub> CO <sub>3</sub> (1)              | HFIP | 64 | - |
| 39 | [IrCp*Cl <sub>2</sub> ] <sub>2</sub> (2.5)                 | KPF <sub>6</sub> (10)   | Ag <sub>2</sub> CO <sub>3</sub> (1)              | HFIP | 20 | - |
| 40 | [IrCp*Cl <sub>2</sub> ] <sub>2</sub> (2.5)                 | AgSbF <sub>6</sub> (10) | Ag <sub>2</sub> CO <sub>3</sub> (1) + AgOPiv (1) | HFIP | 80 | - |
| 41 | [IrCp*Cl <sub>2</sub> ] <sub>2</sub> (2.5)                 | AgSbF <sub>6</sub> (10) | Ag <sub>2</sub> CO <sub>3</sub> (1) + PivOH (1)  | HFIP | 75 | 5 |
| 42 | [Ru( <i>p</i> -cymene)Cl <sub>2</sub> ] <sub>2</sub> (2.5) | AgSbF <sub>6</sub> (10) | Ag <sub>2</sub> CO <sub>3</sub> (1)              | HFIP | 20 | - |
| 43 | [RhCp*Cl <sub>2</sub> ] <sub>2</sub> (2.5)                 | AgSbF <sub>6</sub> (10) | Ag <sub>2</sub> CO <sub>3</sub> (1)              | HFIP | 10 | - |
| 44 | [IrCp*Cl <sub>2</sub> ] <sub>2</sub> (2.5)                 | AgSbF <sub>6</sub> (10) | Ag <sub>2</sub> CO <sub>3</sub> (2)              | HFIP | 84 | - |

<sup>a</sup>PivOH (1 equiv) was added; <sup>b</sup> reaction was performed without AgSbF<sub>6</sub>. <sup>c</sup> reaction was performed without **1a**.

It is to be noted that compound **3aa** and **2aa** were found to have same R<sub>f</sub> on TLC in hexane-ethyl acetate mobile phase. The yields were calculated based on NMR after isolating the mixture of **3aa** and **2aa** from column chromatography.

#### 4. General procedure for C-H olefination and characterization data of compounds (**3aa-3ra**, **3ab-3ao**):

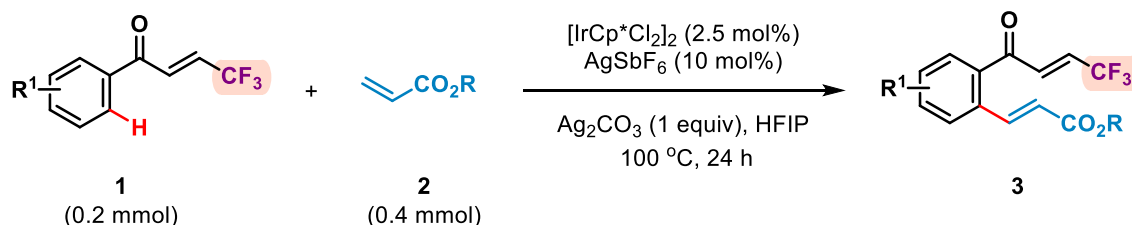

**Scheme 5.** General procedure for the *Ortho*-C-H Olefination

To an oven-dried sealed tube with (*E*)-4,4,4-Trifluoro-1-(*aryl*)but-2-en-1-one (**1**) (0.2 mmol, 100 mol %), acrylate (**2**) (0.4 mmol, 200 mol %), [IrCp\*Cl<sub>2</sub>]<sub>2</sub> (4.0 mg, 0.005 mmol, 2.5 mol %), AgSbF<sub>6</sub> (6.9 mg, 0.02 mmol, 10 mol %) and Ag<sub>2</sub>CO<sub>3</sub> (55.1 mg, 0.2 mmol, 100 mol %) was added in HFIP (1 mL). The reaction mixture was allowed to stir at 100 °C for 24 h. After cooling at room temperature, the reaction mixture was evaporated and the residue was purified by column chromatography on silica gel (230-400 mesh) (eluent; hexane/EtOAc = 20:1) to provide desired olefinated product **3**.

**Ethyl (E)-3-(5-methyl-2-((E)-4,4,4-trifluorobut-2-enoyl)phenyl)acrylate (3aa):**

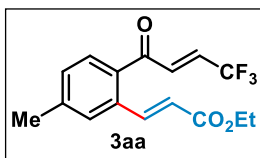

50 mg (82%); white solid; mp = 45–48 °C;  $^1\text{H NMR}$  (500 MHz,  $\text{CDCl}_3$ )  $\delta$  8.02 (d,  $J$  = 15.8 Hz, 1H), 7.59 (d,  $J$  = 7.9 Hz, 1H), 7.46 (d,  $J$  = 0.9 Hz, 1H), 7.31 (dd,  $J$  = 7.9, 2.5 Hz, 1H), 7.26 (dq,  $J$  = 15.7, 2 Hz, 1H), 6.70 (dq,  $J_{\text{H-H}}$  = 15.7,  $J_{\text{H-F}}$  = 6.6 Hz, 1H), 6.32 (d,  $J$  = 15.7, 1H), 4.27 (q,  $J$  = 7 Hz, 2H), 2.45 (s, 3H), 1.33 (t,  $J$  = 7.1 Hz, 3H);  $^{13}\text{C NMR}$  (125 MHz,  $\text{CDCl}_3$ )  $\delta$  190.3, 166.3, 143.7, 142.7, 135.7, 134.1, 133.6 (q,  $^3J_{\text{C-F}}$  = 5.5 Hz), 130.6 (q,  $^2J_{\text{C-F}}$  = 34.7 Hz), 130.1, 129.7, 129.2, 122.4 (q,  $^1J_{\text{C-F}}$  = 269.8 Hz), 121.8, 60.7, 21.6, 14.2;  $^{19}\text{F NMR}$  (470 MHz,  $\text{CDCl}_3$ )  $\delta$  -65.0; IR (KBr)  $\nu$   $\text{cm}^{-1}$  2986, 2903, 1714, 1642, 1603, 1490, 1368, 1304, 1278, 1225, 1179, 1041, 971, 867, 654, 600, 532, 438, 419; HRMS (Q-TOF, ESI) calcd for  $\text{C}_{16}\text{H}_{16}\text{F}_3\text{O}_3^+$   $[\text{M}+\text{H}]^+$  313.1046, found 313.1047.

**Diethyl (2E,4E)-hexa-2,4-dienedioate (2aa):**

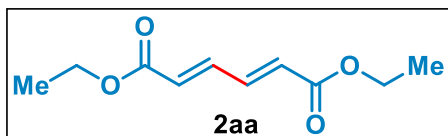

White liquid;  $^1\text{H NMR}$  (500 MHz,  $\text{CDCl}_3$ )  $\delta$  7.31 (dd,  $J$  = 11.4, 3.1 Hz, 2H), 6.20 (dd,  $J$  = 11.4, 3.0 Hz, 2H), 4.24 (q,  $J$  = 7.1 Hz, 4H), 1.32 (t,  $J$  = 7.2 Hz, 6H);  $^{13}\text{C NMR}$  (125 MHz,  $\text{CDCl}_3$ )  $\delta$  165.9, 140.8, 128.4, 60.8, 14.2; IR (KBr)  $\nu$   $\text{cm}^{-1}$  3066, 2960, 2925, 2853, 1698, 1613, 1464, 1367, 1313, 1258, 1158, 1025, 862, 803, 694; HRMS (Q-TOF, ESI) calcd for  $\text{C}_{18}\text{H}_{15}\text{F}_3\text{NO}$   $[\text{M}+\text{H}]^+$  199.0965, found 199.0969.

**Ethyl (E)-3-(4-methyl-2-((E)-4,4,4-trifluorobut-2-enoyl)phenyl)acrylate (3ba):**

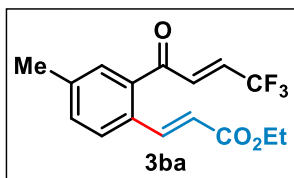

44 mg (70%); white solid; mp = 60–62 °C;  $^1\text{H NMR}$  (500 MHz,  $\text{CDCl}_3$ )  $\delta$  7.95 (d,  $J$  = 15.9 Hz, 1H), 7.59 (d,  $J$  = 7.9 Hz, 1H), 7.45 (d,  $J$  = 2.0 Hz, 1H), 7.40 (dd,  $J$  = 7.9, 2.0 Hz, 1H), 7.24 (dq,  $J_{\text{H-H}}$  = 15.7,  $J_{\text{H-F}}$  = 2.1 Hz, 1H), 6.70 (dq,  $J_{\text{H-H}}$  = 15.7,  $J_{\text{H-F}}$  = 6.6 Hz, 1H), 6.33 (d,  $J$  = 15.9 Hz, 1H), 4.27 (q,  $J$  = 7 Hz, 2H), 2.45 (s, 3H), 1.33 (t,  $J$  = 7.1, 3H);  $^{13}\text{C NMR}$  (125 MHz,  $\text{CDCl}_3$ )  $\delta$  191.3, 166.3, 141.9, 140.7, 140.1, 137.0, 133.8 (q,  $^3J_{\text{C-F}}$  = 5.4 Hz), 133.4, 132.3, 130.8 (q,  $^2J_{\text{C-F}}$  = 35.1 Hz), 129.7, 128.4, 128.2, 122.3 (q,  $^1J_{\text{C-F}}$  = 268.6 Hz), 121.1, 60.6, 21.2, 14.2;  $^{19}\text{F NMR}$  (470 MHz,  $\text{CDCl}_3$ )  $\delta$  -65.1; IR (KBr)  $\nu$   $\text{cm}^{-1}$  3476, 3415, 3071, 2983, 2928, 1703, 1638, 1318, 1299, 1188, 1175, 1034, 972, 634, 535; HRMS (Q-TOF, ESI) calcd for  $\text{C}_{16}\text{H}_{16}\text{F}_3\text{O}_3^+$   $[\text{M}+\text{H}]^+$  313.1046, found 313.1055

**Ethyl (E)-3-(3-methyl-2-((E)-4,4,4-trifluorobut-2-enoyl)phenyl)acrylate (3ca):**

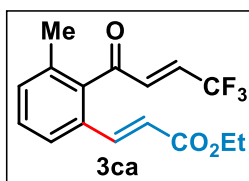

37 mg (60%); White solid; mp = 63–65 °C;  $^1\text{H NMR}$  (500 MHz,  $\text{CDCl}_3$ )  $\delta$  7.53 (d,  $J$  = 8.5 Hz, 1H), 7.49 (d,  $J$  = 15.9 Hz, 1H), 7.41 (t,  $J$  = 7.7 Hz, 1H), 7.30 (d,  $J$  = 7.6 Hz, 1H), 6.92 (dq,  $J_{\text{H-H}}$  = 16.0,  $J_{\text{H-F}}$  = 1.8 Hz, 1H), 6.37 (d,  $J$  = 15.7, 1H), 6.35 (dq,  $J_{\text{H-H}}$  = 16.2,  $J_{\text{H-F}}$  = 6.25 Hz, 1H), 4.26 (q,

$J = 7.1$  Hz, 2H), 2.26 (s, 3H) 1.33 (t,  $J = 7.1$  Hz, 3H);  $^{13}\text{C}$  NMR (125 MHz,  $\text{CDCl}_3$ )  $\delta$  196.9, 166.0, 140.5, 138.2, 136.0 (q,  $^3J_{\text{C-F}} = 5.4$  Hz), 135.2, 132.3 (q,  $^2J_{\text{C-F}} = 35.6$  Hz), 132.1, 130.2, 124.6, 122.1 (q,  $^1J_{\text{C-F}} = 269.1$  Hz), 122.0, 60.7, 19.4, 14.2;  $^{19}\text{F}$  NMR (470 MHz,  $\text{CDCl}_3$ )  $\delta$  -65.2; IR (KBr)  $\nu$   $\text{cm}^{-1}$  3407, 3069, 1709, 1664, 1464, 1367, 1317, 1262, 1231, 1190, 989, 664, 606; HRMS (Q-TOF, ESI) calcd for  $\text{C}_{16}\text{H}_{16}\text{F}_3\text{O}_3^+$   $[\text{M}+\text{H}]^+$  313.1046, found 313.1052.

**Ethyl (E)-3-(3-methoxy-2-((E)-4,4,4-trifluorobut-2-enoyl)phenyl)acrylate (3da):**

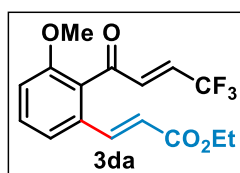

40 mg (61%); Yellow semi-solid;  $^1\text{H}$  NMR (500 MHz,  $\text{CDCl}_3$ )  $\delta$  7.56 (d,  $J = 15.9$  Hz, 1H), 7.45 (t,  $J = 8.1$  Hz, 1H), 7.27 (d,  $J = 7.2$  Hz, 1H), 7.03 (dq,  $J_{\text{H-H}} = 15.8$ ,  $J_{\text{H-F}} = 2.0$  Hz, 1H), 7.00-6.98 (m, 1H), 6.50 (dq,  $J_{\text{H-H}} = 15.9$ ,  $J_{\text{H-F}} = 6.6$  Hz, 1H), 6.37 (d,  $J = 15.9$  Hz, 1H), 4.24 (q,  $J = 7.1$  Hz, 2H), 3.85 (s, 3H), 1.31 (t,  $J = 7.2$  Hz, 3H);  $^{13}\text{C}$  NMR (125 MHz,  $\text{CDCl}_3$ )  $\delta$  192.9, 166.1, 157.7, 140.6, 136.0 (q,  $^3J_{\text{C-F}} = 5.4$  Hz), 134.7, 132.0, 129.3 (q,  $^2J_{\text{C-F}} = 35.1$  Hz), 128.0, 123.6 (q,  $^1J_{\text{C-F}} = 268.6$  Hz), 122.1, 119.5, 112.3, 60.7, 55.9, 14.2;  $^{19}\text{F}$  NMR (470 MHz,  $\text{CDCl}_3$ )  $\delta$  -64.9; IR (KBr)  $\nu$   $\text{cm}^{-1}$  3390, 2900, 1712, 1670, 1600, 1495, 1300, 1185, 1020, 965, 820, 605; HRMS (Q-TOF, ESI) calcd for  $\text{C}_{16}\text{H}_{16}\text{F}_3\text{O}_4$   $[\text{M}+\text{H}]^+$  329.0995, found 329.0985.

**Ethyl (E)-3-(5-methoxy-2-((E)-4,4,4-trifluorobut-2-enoyl)phenyl)acrylate (3ea):**

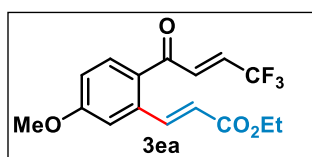

45 mg (69%); Off white solid; mp = 102–104 °C;  $^1\text{H}$  NMR (500 MHz,  $\text{CDCl}_3$ )  $\delta$  8.13 (d,  $J = 15.9$  Hz, 1H), 7.74 (d,  $J = 8.7$  Hz, 1H), 7.35 (dq,  $J_{\text{H-H}} = 15.6$ ,  $J_{\text{H-F}} = 2.1$  Hz, 1H), 7.12 (d,  $J = 2.6$  Hz, 1H), 7.00 (dd,  $J = 8.7$ , 2.6 Hz, 1H), 6.73 (dq,  $J_{\text{H-H}} = 15.6$ ,  $J_{\text{H-F}} = 6.6$  Hz, 1H), 6.32 (d,  $J = 15.7$  Hz, 1H), 4.29 (q,  $J = 7.1$  Hz, 2H), 3.92 (s, 3H), 1.36 (t,  $J = 7.2$  Hz, 3H);  $^{13}\text{C}$  NMR (125 MHz,  $\text{CDCl}_3$ )  $\delta$  188.6, 166.2, 163.0, 143.3, 138.8, 133.3 (q,  $^3J_{\text{C-F}} = 5.4$  Hz); 132.3, 130.1 (q,  $^2J_{\text{C-F}} = 34.7$  Hz), 129.1, 122.5 (q,  $^1J_{\text{C-F}} = 268.6$  Hz), 121.9, 114.4, 114.1, 60.7, 55.7, 14.2;  $^{19}\text{F}$  NMR (470 MHz,  $\text{CDCl}_3$ )  $\delta$  -65.0; IR (KBr)  $\nu$   $\text{cm}^{-1}$  3410, 2924, 1710, 1679, 1633, 1594, 1305, 1199, 1028, 973, 821, 662; HRMS (Q-TOF, ESI) calcd for  $\text{C}_{16}\text{H}_{15}\text{F}_3\text{NaO}_4^+$   $[\text{M}+\text{Na}]^+$  351.0815, found 351.0829.

**Diethyl3,3'-(5-methoxy-2-((E)-4,4,4-trifluorobut-2-enoyl)-1,3-phenylene)(2E,2'E)-diacrylate (3ea'):**

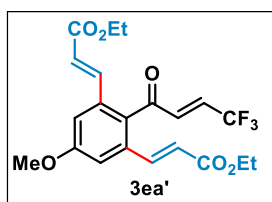

20 mg (23%); Yellow solid; mp = 94–97 °C;  $^1\text{H}$  NMR (500 MHz,  $\text{CDCl}_3$ )  $\delta$  7.54 (d,  $J = 15.7$  Hz, 2H), 7.14 (s, 2H), 6.91 (dq,  $J_{\text{H-H}} = 16.0$ ,  $J_{\text{H-F}} = 2.0$  Hz, 1H), 6.40 (dq,  $J_{\text{H-H}} = 15.9$ ,  $J_{\text{H-F}} = 6.4$  Hz, 1H), 6.34 (d,  $J = 15.7$  Hz, 2H), 4.25 (q,  $J = 7.1$  Hz, 4H), 3.90 (s, 3H), 1.31 (t,  $J = 7.2$  Hz, 6H);  $^{13}\text{C}$  NMR (125 MHz,  $\text{CDCl}_3$ )  $\delta$  194.0, 165.6, 161.0, 140.3, 136.2 (q,  $^3J_{\text{C-F}} = 5.4$  Hz), 135.5, 131.5 (q,  $^2J_{\text{C-F}} = 35.1$  Hz), 131.2, 123.1, 122.1 (q,  $^1J_{\text{C-F}} = 269.5$  Hz), 113.7, 60.9, 55.6, 14.1;

$^{19}\text{F}$  NMR (470 MHz,  $\text{CDCl}_3$ )  $\delta$  -65.2; IR (KBr)  $\nu$   $\text{cm}^{-1}$  3478, 2989, 1705, 1635, 1368, 1301, 1250, 1136, 1043, 970, 864, 654, 624; HRMS (Q-TOF, ESI) calcd for  $\text{C}_{21}\text{H}_{22}\text{F}_3\text{O}_6^+$   $[\text{M}+\text{H}]^+$  427.1363, found 427.1355

**Ethyl (E)-3-(2,3-dimethyl-6-((E)-4,4,4-trifluorobut-2-enoyl)phenyl)acrylate (3fa):**

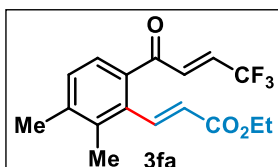

36 mg (55%); Light yellow semisolid;  $^1\text{H}$  NMR (500 MHz, DMSO)  $\delta$  7.98 (d,  $J$  = 15.9 Hz, 1H), 7.75 (d,  $J$  = 8.7 Hz, 2H), 7.65 (dq,  $J_{\text{H-H}}$  = 15.7,  $J_{\text{H-F}}$  = 2.2 Hz, 1H), 6.95 (dq,  $J_{\text{H-H}}$  = 15.7,  $J_{\text{H-F}}$  = 7.0 Hz, 1H), 6.51 (d,  $J$  = 15.9 Hz, 1H), 4.20 (q,  $J$  = 7.2 Hz, 2H), 2.33 (s, 6H), 1.26 (t,  $J$  = 7.2 Hz, 3H);  $^{13}\text{C}$  NMR (125 MHz, DMSO)  $\delta$  190.8, 166.5, 143.3, 142.9, 139.4, 135.5 (q,  $^3J_{\text{C-F}}$  = 5.4 Hz), 134.4, 132.5, 131.7, 129.7, 129.2 (q,  $^2J_{\text{C-F}}$  = 33.5 Hz), 124.5 (q,  $^1J_{\text{C-F}}$  = 268.6 Hz), 120.1, 60.5, 19.9, 19.5, 14.6;  $^{19}\text{F}$  NMR (470 MHz, DMSO)  $\delta$  -63.3; IR (KBr)  $\nu$   $\text{cm}^{-1}$  2981, 2923, 2853, 1706, 1636, 1548, 1511, 1450, 1369, 1305, 1269, 1169, 1132, 1043, 972, 861, 773, 651, 614, 441; HRMS (Q-TOF, ESI) calcd for  $\text{C}_{17}\text{H}_{18}\text{F}_3\text{O}_3$   $[\text{M}+\text{H}]^+$  327.1203, found 327.1198.

**Ethyl (E)-3-(5-((E)-4,4,4-trifluorobut-2-enoyl)benzo[d][1,3]dioxol-4-yl)acrylate (3ga):**

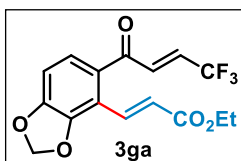

42 mg (61%); Light yellow solid; mp = 98–101 °C;  $^1\text{H}$  NMR (500 MHz,  $\text{CDCl}_3$ )  $\delta$  7.91 (d,  $J$  = 16.2 Hz, 1H), 7.31 (d,  $J$  = 8.2 Hz, 1H), 7.23 (dq,  $J_{\text{H-H}}$  = 16.1,  $J_{\text{H-F}}$  = 1.8 Hz, 1H), 6.88 (d,  $J$  = 8.1 Hz, 1H); 6.76-6.67 (m, 2H), 6.17 (s, 2H), 4.27 (q,  $J$  = 7.1 Hz, 2H), 1.33 (t,  $J$  = 7.1 Hz, 3H);  $^{13}\text{C}$  NMR (125 MHz,  $\text{CDCl}_3$ )  $\delta$  188.9, 166.7, 151.4, 147.9, 136.3, 133.9 (q,  $^3J_{\text{C-F}}$  = 5.9 Hz), 131.3, 130.5 (q,  $^2J_{\text{C-F}}$  = 35.1 Hz), 126.0, 124.7, 123.5 (q,  $^1J_{\text{C-F}}$  = 268.6 Hz), 117.5, 108.0, 102.4, 60.6, 14.2;  $^{19}\text{F}$  NMR (470 MHz,  $\text{CDCl}_3$ )  $\delta$  -65.0; IR (KBr)  $\nu$   $\text{cm}^{-1}$  3412, 2908, 1711, 1676, 1632, 1587, 1448, 1298, 1186, 1127, 1059, 970, 626; HRMS (Q-TOF, ESI) calcd for  $\text{C}_{16}\text{H}_{14}\text{F}_3\text{O}_5$   $[\text{M}+\text{H}]^+$  343.0788, found 343.0781.

**Ethyl (E)-3-(2,3,4-trimethoxy-6-((E)-4,4,4-trifluorobut-2-enoyl)phenyl)acrylate (3ha):**

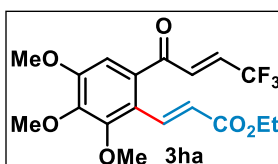

43 mg (55%); Yellow semi-solid;  $^1\text{H}$  NMR (500 MHz,  $\text{CDCl}_3$ )  $\delta$  7.82 (d,  $J$  = 16.0 Hz, 1H), 6.94 (dq,  $J_{\text{H-H}}$  = 15.7,  $J_{\text{H-F}}$  = 2.0 Hz, 1H), 6.88 (s, 1H), 6.65 (dq,  $J_{\text{H-H}}$  = 15.7,  $J_{\text{H-F}}$  = 6.6 Hz, 1H), 6.18 (d,  $J$  = 16.0 Hz, 1H), 4.25 (q,  $J$  = 7.2 Hz, 2H), 3.95 (s, 3H), 3.93 (s, 3H), 3.90 (s, 3H), 1.32 (t,  $J$  = 7.2 Hz, 3H);  $^{13}\text{C}$  NMR (125 MHz,  $\text{CDCl}_3$ )  $\delta$  191.6, 166.1, 154.2, 152.9, 145.3, 137.5, 134.7 (q,  $^3J_{\text{C-F}}$  = 5.9 Hz), 134.4, 129.5 (q,  $^2J_{\text{C-F}}$  = 35.1 Hz), 125.2, 123.4 (q,  $^1J_{\text{C-F}}$  = 268.6 Hz), 122.0, 108.2, 61.1, 61.0, 60.6, 56.2, 14.2;  $^{19}\text{F}$  NMR (470 MHz,  $\text{CDCl}_3$ )  $\delta$  -65.0; IR (KBr)



$\nu$   $\text{cm}^{-1}$  2924, 2853, 1717, 1630, 1582, 1464, 1340, 1304, 1177, 1133, 970, 849, 835, 702, 633; **HRMS (Q-TOF, ESI)** calcd for  $\text{C}_{18}\text{H}_{20}\text{F}_3\text{O}_6^+$   $[\text{M}+\text{H}]^+$  389.1206, found 389.1178.

**Ethyl (E)-3-(2-((E)-4,4,4-trifluorobut-2-enoyl)phenyl)acrylate (3ia):**

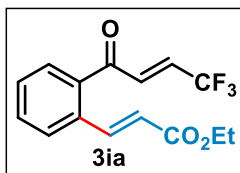

37 mg (62%); yellow semi-solid;  $^1\text{H NMR}$  (500 MHz,  $\text{CDCl}_3$ )  $\delta$  8.00 (d,  $J$  = 15.9 Hz, 1H), 7.70-7.67 (m, 2H), 7.61 (td,  $J$  = 7.6, 1.8 Hz, 1H), 7.53 (td,  $J$  = 7.6, 1.4 Hz, 1H), 7.27 (dq,  $J_{\text{H-H}} = 15.7$ ,  $J_{\text{H-F}} = 2$  Hz, 1H), 6.71 (dq,  $J_{\text{H-H}} = 15.9$ ,  $J_{\text{H-F}} = 6.6$  Hz, 1H), 6.36 (d,  $J$  = 15.9 Hz, 1H), 4.29 (q,  $J$  = 7.2 Hz, 2H), 1.35 (t,  $J$  = 7.1 Hz, 3H);  $^{13}\text{C NMR}$  (125 MHz,  $\text{CDCl}_3$ )  $\delta$  191.0, 166.1, 142.1, 140.7, 136.8, 135.2, 133.7 (q,  $^3J_{\text{C-F}} = 5.5$  Hz), 132.7, 131.5 (q,  $^2J_{\text{C-F}} = 35.1$  Hz), 129.5, 129.3, 128.3, 123.4 (q,  $^1J_{\text{C-F}} = 268.6$  Hz), 122.1, 60.7, 14.2;  $^{19}\text{F NMR}$  (470 MHz,  $\text{CDCl}_3$ )  $\delta$  -65.1; **IR (KBr)**  $\nu$   $\text{cm}^{-1}$  3478, 2985, 2928, 1713, 1635, 1617, 1468, 1368, 1301, 1268, 1138, 1037, 760, 613; **HRMS (Q-TOF, ESI)** calcd for  $\text{C}_{15}\text{H}_{14}\text{F}_3\text{O}_3^+$   $[\text{M}+\text{H}]^+$  299.0890, found 299.0894.

**Ethyl (E)-3-(4-bromo-2-((E)-4,4,4-trifluorobut-2-enoyl)phenyl)acrylate (3ja):**

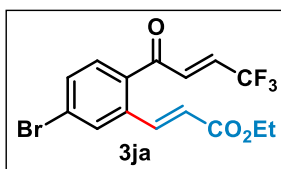

30 mg (40%); white solid; mp = 64–66 °C;  $^1\text{H NMR}$  (500 MHz,  $\text{CDCl}_3$ )  $\delta$  7.93 (d,  $J$  = 15.8 Hz, 1H), 7.83 (d,  $J$  = 1.95 Hz, 1H), 7.67 (dd,  $J$  = 8.3, 1.9 Hz, 1H), 7.56 (d,  $J$  = 8.4 Hz, 1H), 7.24 (dq,  $J_{\text{H-H}} = 15.7$ ,  $J_{\text{H-F}} = 2$  Hz, 1H), 6.73 (dq,  $J_{\text{H-H}} = 15.7$ ,  $J_{\text{H-F}} = 6.5$  Hz, 1H), 6.36 (d,  $J$  = 15.8, 1H), 4.3 (q,  $J$  = 7.2 Hz, 2H), 1.35 (t,  $J$  = 7.2 Hz, 3H);  $^{13}\text{C NMR}$  (125 MHz,  $\text{CDCl}_3$ )  $\delta$  189.9, 165.7, 140.7, 137.3, 135.3, 133.2 (q,  $^3J_{\text{C-F}} = 5.9$  Hz), 132.4, 131.5 (q,  $^2J_{\text{C-F}} = 35.1$  Hz), 131.4, 130.6, 127.7, 123.3, 123.2 (q,  $^1J_{\text{C-F}} = 269.1$  Hz), 60.9, 14.2;  $^{19}\text{F NMR}$  (470 MHz,  $\text{CDCl}_3$ )  $\delta$  -65.1; **IR (KBr)**  $\nu$   $\text{cm}^{-1}$  3407, 2952, 1713, 1685, 1637, 1300, 1268, 1187, 1152, 971, 860, 639; **HRMS (Q-TOF, ESI)** calcd for  $\text{C}_{15}\text{H}_{13}\text{F}_3\text{BrO}_3$   $[\text{M}+\text{H}]^+$  376.9995, found 376.9978.

**Ethyl (E)-3-(5-chloro-2-((E)-4,4,4-trifluorobut-2-enoyl)phenyl)acrylate (3ka):**

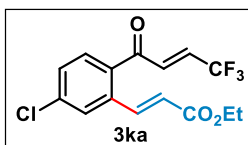

23 mg (35%); white solid; mp = 67–69 °C;  $^1\text{H NMR}$  (500 MHz,  $\text{CDCl}_3$ )  $\delta$  7.93 (d,  $J$  = 15.9 Hz, 1H), 7.64 (d,  $J$  = 2.0 Hz, 1H), 7.62 (d,  $J$  = 8.2 Hz, 1H), 7.48 (dd,  $J$  = 8.3, 2.1 Hz, 1H), 7.22 (dq,  $J_{\text{H-H}} = 15.7$ ,  $J_{\text{H-F}} = 2.0$  Hz, 1H), 6.71 (dq,  $J_{\text{H-H}} = 15.7$ ,  $J_{\text{H-F}} = 6.6$  Hz, 1H), 6.35 (d,  $J$  = 15.7 Hz, 1H), 4.27 (q,  $J$  = 7.1 Hz, 2H), 1.33 (t,  $J$  = 7.2 Hz, 3H);  $^{13}\text{C NMR}$  (125 MHz,  $\text{CDCl}_3$ )  $\delta$  189.7, 165.8, 140.9, 139.2, 137.3, 134.9, 133.2 (q,  $^3J_{\text{C-F}} = 5.4$  Hz), 131.5 (q,  $^3J_{\text{C-F}} = 35.1$  Hz), 130.7, 129.5, 128.5, 123.3 (q,  $^3J_{\text{C-F}} = 269.1$  Hz), 123.2, 60.9, 14.2;  $^{19}\text{F NMR}$  (470 MHz,  $\text{CDCl}_3$ )  $\delta$  -65.1; **IR (KBr)**  $\nu$   $\text{cm}^{-1}$  3475, 2979, 1712, 1685, 1638, 1552, 1480, 1130, 1010, 969, 918, 831, 766, 644; **HRMS (Q-TOF, ESI)** calcd for  $\text{C}_{15}\text{H}_{13}\text{F}_3\text{ClO}_3$   $[\text{M}+\text{H}]^+$  333.0500, found 333.0485.

**Ethyl (E)-3-(2-((E)-4,4,4-trifluorobut-2-enoyl)-5-(trifluoromethyl)phenyl)acrylate (3la):**

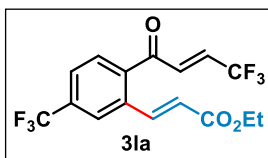

11 mg (15%); light yellow liquid;  $^1\text{H NMR}$  (500 MHz,  $\text{CDCl}_3$ )  $\delta$  7.95 (d,  $J = 15.4$  Hz, 1H), 7.94-7.93 (m, 1H), 7.79-7.75 (m, 2H), 7.22 (dq,  $J_{\text{H-H}} = 15.7$ ,  $J_{\text{H-F}} = 1.9$  Hz, 1H), 6.72 (dq,  $J_{\text{H-H}} = 15.9$ ,  $J_{\text{H-F}} = 6.4$  Hz, 1H), 6.45 (d,  $J = 15.9$ , 1H), 4.31 (q,  $J = 7.1$  Hz, 2H), 1.36 (t,  $J = 7.1$  Hz, 3H);  $^{13}\text{C NMR}$  (125 MHz,  $\text{CDCl}_3$ )  $\delta$  190.5, 165.6, 140.2, 139.6, 135.8, 134.2 (q,  $^2J_{\text{C-F}} = 33.3$  Hz), 133.2 (q,  $^3J_{\text{C-F}} = 5.4$  Hz), 132.1 (q,  $^2J_{\text{C-F}} = 35.6$  Hz), 129.5, 126.1 (q,  $^4J_{\text{C-F}} = 3.6$  Hz), 125.1 (q,  $^4J_{\text{C-F}} = 3.6$  Hz), 123.9, 124.1 (q<sub>(Ar)</sub>,  $^1J_{\text{C-F}} = 271.3$  Hz), 123.1 (q<sub>(β)</sub>,  $^1J_{\text{C-F}} = 269.5$  Hz), 61.0, 14.2;  $^{19}\text{F NMR}$  (470 MHz,  $\text{CDCl}_3$ )  $\delta$  -63.3, -65.2; IR (KBr)  $\nu$   $\text{cm}^{-1}$  3470, 2960, 1700, 1680, 1638, 1550, 14700, 1202, 1015, 960, 910, 825, 755, 645; HRMS (Q-TOF, ESI) calcd for  $\text{C}_{16}\text{H}_{13}\text{F}_6\text{O}_3$   $[\text{M}+\text{H}]^+$  367.0763, found 367.0761.

#### Ethyl (E)-3-(2-chloro-6-((E)-4,4,4-trifluorobut-2-enoyl)phenyl)acrylate (3ma):

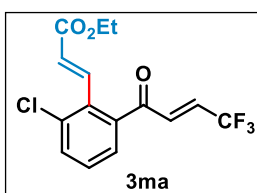

18 mg (27%); Yellow liquid;  $^1\text{H NMR}$  (500 MHz,  $\text{CDCl}_3$ )  $\delta$  7.92 (d,  $J = 16.0$  Hz, 1H), 7.62 (dd,  $J = 7.8$ , 1.4 Hz, 1H), 7.47 (dd,  $J = 7.8$ , 1.5 Hz, 1H), 7.42 (t,  $J = 7.8$  Hz, 1H), 6.88 (dq,  $J_{\text{H-H}} = 15.7$ ,  $J_{\text{H-F}} = 1.9$  Hz, 1H), 6.60 (dq,  $J_{\text{H-H}} = 15.7$ ,  $J_{\text{H-F}} = 6.6$  Hz, 1H), 5.96 (d,  $J = 16.1$  Hz, 1H), 4.26 (q,  $J = 7.1$  Hz, 2H), 1.31 (t,  $J = 7.2$  Hz, 3H);  $^{13}\text{C NMR}$  (125 MHz,  $\text{CDCl}_3$ )  $\delta$  191.5, 165.0, 139.8, 139.1, 135.0, 134.3 (q,  $^3J_{\text{C-F}} = 5.4$  Hz), 133.1, 130.1 (q,  $^2J_{\text{C-F}} = 35.1$  Hz), 130.0, 128.4, 127.5, 123.3 (q,  $^1J_{\text{C-F}} = 269.0$  Hz), 61.0, 14.1;  $^{19}\text{F NMR}$  (470 MHz,  $\text{CDCl}_3$ )  $\delta$  -65.1; IR (KBr)  $\nu$   $\text{cm}^{-1}$  3472, 2970, 1710, 1682, 1638, 1550, 1481, 1132, 1100, 9500, 920, 825, 544, 430; HRMS (Q-TOF, ESI) calcd for  $\text{C}_{15}\text{H}_{13}\text{F}_3\text{ClO}_3$   $[\text{M}+\text{H}]^+$  333.0500, found 333.0448.

#### Ethyl (E)-3-(3-chloro-2-((E)-4,4,4-trifluorobut-2-enoyl)phenyl)acrylate (3na):

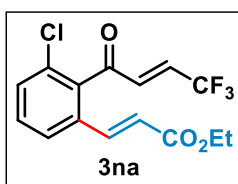

30 mg (45%); Yellow semi-solid;  $^1\text{H NMR}$  (500 MHz,  $\text{CDCl}_3$ )  $\delta$  7.62 (dd,  $J = 6.5$ , 2.4 Hz, 1H), 7.49-7.44 (m, 3H), 7.00 (dq,  $J_{\text{H-H}} = 16.0$ ,  $J_{\text{H-F}} = 1.8$  Hz, 1H), 6.46 (dq,  $J_{\text{H-H}} = 16.7$ ,  $J_{\text{H-F}} = 6.4$  Hz, 1H), 6.42 (d,  $J = 15.8$  Hz, 1H), 4.27 (q,  $J = 7.1$  Hz, 2H), 1.34 (t,  $J = 7.1$  Hz, 3H);  $^{13}\text{C NMR}$  (125 MHz,  $\text{CDCl}_3$ )  $\delta$  192.6, 165.7, 139.0, 137.2, 135.1 (q,  $^3J_{\text{C-F}} = 5.4$  Hz), 135.1 (q,  $^2J_{\text{C-F}} = 35.6$  Hz), 134.5, 131.3, 130.9, 125.5, 123.3, 123.2 (q,  $^1J_{\text{C-F}} = 269.0$  Hz), 60.9, 14.2;  $^{19}\text{F NMR}$  (470 MHz,  $\text{CDCl}_3$ )  $\delta$  -65.2; IR (KBr)  $\nu$   $\text{cm}^{-1}$  3060, 2978, 2930, 1706, 1679, 1641, 1453, 1369, 1316, 1268, 1243, 1194, 1144, 1043, 1000, 974, 869, 791, 759, 650, 597, 428; HRMS (Q-TOF, ESI) calcd for  $\text{C}_{15}\text{H}_{13}\text{F}_3\text{ClO}_3$   $[\text{M}+\text{H}]^+$  333.0500, found 333.0498.

**Ethyl (E)-3-(3,5-dichloro-2-((E)-4,4,4-trifluorobut-2-enoyl)phenyl)acrylate (3oa):**

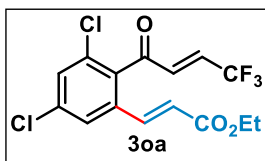

19 mg (26%); White liquid;  $^1\text{H NMR}$  (500 MHz,  $\text{CDCl}_3$ )  $\delta$  7.58 (d,  $J$  = 1.8 Hz, 1H), 7.48 (d,  $J$  = 1.8 Hz, 1H), 7.37 (d,  $J$  = 15.9 Hz, 1H), 6.96 (dq,  $J_{\text{H-H}}$  = 16.0,  $J_{\text{H-F}}$  = 1.8 Hz, 1H), 6.45 (dq,  $J_{\text{H-H}}$  = 16.0,  $J_{\text{H-F}}$  = 6.4 Hz, 1H), 6.39 (d,  $J$  = 15.9 Hz, 1H), 4.25 (q,  $J$  = 7.1 Hz, 2H), 1.31 (t,  $J$  = 7.2 Hz, 3H);  $^{13}\text{C NMR}$  (125 MHz,  $\text{CDCl}_3$ )  $\delta$  191.6, 165.3, 137.8, 137.1, 135.9, 135.5, 134.8 (q,  $^3J_{\text{C-F}}$  = 5.5 Hz), 132.2, 131.9 (q,  $^2J_{\text{C-F}}$  = 35.6 Hz), 130.6, 125.7, 124.4, 123.1 (q,  $^1J_{\text{C-F}}$  = 269.5 Hz), 61.1, 14.1;  $^{19}\text{F NMR}$  (470 MHz,  $\text{CDCl}_3$ )  $\delta$  -65.2; IR (KBr)  $\nu$   $\text{cm}^{-1}$  3072, 2984, 2932, 1719, 1686, 1643, 1579, 1547, 1368, 1313, 1267, 1178, 1140, 1037, 972, 861, 831, 650, 599, 505; HRMS (Q-TOF, ESI) calcd for  $\text{C}_{15}\text{H}_{12}\text{F}_3\text{Cl}_2\text{O}_3$   $[\text{M}+\text{H}]^+$  367.0110, found 367.0102.

**Ethyl (E)-3-(2-((E)-4,4,4-trifluoro-3-methylbut-2-enoyl)phenyl)acrylate (3pa):**

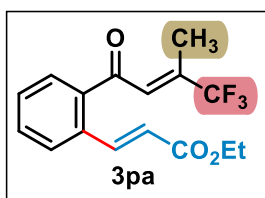

38 mg (60%); Yellow liquid;  $^1\text{H NMR}$  (500 MHz,  $\text{CDCl}_3$ )  $\delta$  8.10 (d,  $J$  = 15.9 Hz, 1H), 7.70 (dd,  $J$  = 7.7, 1.4 Hz, 1H), 7.66 (dd,  $J$  = 7.9, 1.5 Hz, 1H), 7.59 (td,  $J$  = 7.6, 1.7 Hz, 1H), 7.52 (td,  $J$  = 7.6, 1.4 Hz, 1H), 7.06 (hept,  $J$  = 1.5 Hz, 1H), 6.36 (d,  $J$  = 15.9 Hz, 1H), 4.30 (q,  $J$  = 7.2 Hz, 2H), 2.23 (d,  $J$  = 1.7 Hz, 3H), 1.36 (t,  $J$  = 7.1 Hz, 3H);  $^{13}\text{C NMR}$  (125 MHz,  $\text{CDCl}_3$ )  $\delta$  193.0, 166.2, 142.7, 140.8 (q,  $^2J_{\text{C-F}}$  = 33.8 Hz), 138.0, 135.2, 132.6, 129.5, 129.4, 128.4, 127.2 (q,  $^3J_{\text{C-F}}$  = 5.5 Hz), 124.4 (q,  $^1J_{\text{C-F}}$  = 272.7 Hz), 121.8, 60.7, 14.2, 12.8;  $^{19}\text{F NMR}$  (470 MHz,  $\text{CDCl}_3$ )  $\delta$  -70.9; IR (KBr)  $\nu$   $\text{cm}^{-1}$  3488, 3475, 3415, 2984, 2930, 1715, 1679, 1637, 1618, 1480, 1367, 1297, 1228, 1179, 1130, 1097, 1035, 971, 885, 765, 612, 484, 417; HRMS (Q-TOF, ESI) calcd for  $\text{C}_{16}\text{H}_{16}\text{F}_3\text{O}_3$   $[\text{M}+\text{H}]^+$  313.1046, found 313.1028.

**Ethyl (E)-3-(2-((E)-but-2-enoyl)phenyl)acrylate (3qa):**

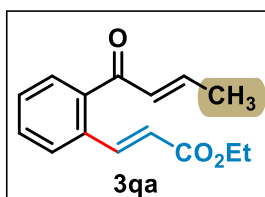

17 mg (35%); Yellow liquid;  $^1\text{H NMR}$  (500 MHz,  $\text{CDCl}_3$ )  $\delta$  7.85 (d,  $J$  = 16.0 Hz, 1H), 7.66 – 7.64 (m, 1H), 7.48 – 7.40 (m, 3H), 6.75 (dq,  $J_{\text{H-H}}$  = 15.6,  $J_{\text{H-F}}$  = 6.9 Hz, 1H), 6.54 (dq,  $J_{\text{H-H}}$  = 15.6,  $J_{\text{H-F}}$  = 1.6 Hz, 1H), 6.37 (d,  $J$  = 15.9 Hz, 1H), 4.25 (q,  $J$  = 7.2 Hz, 2H), 1.96 (dd,  $J$  = 6.9, 1.5 Hz, 3H), 1.32 (t,  $J$  = 7.2 Hz, 3H);  $^{13}\text{C NMR}$  (125 MHz,  $\text{CDCl}_3$ )  $\delta$  195.5, 166.5, 148.2, 142.2, 139.8, 133.6, 132.2, 130.6, 129.3, 128.5, 127.3, 120.7, 60.6, 18.6, 14.3; IR (KBr)  $\nu$   $\text{cm}^{-1}$  3469, 3410, 3070, 2980, 2900, 1700, 1628, 1300, 1250, 1175, 1150, 1020, 970, 610; HRMS (Q-TOF, ESI) calcd for  $\text{C}_{15}\text{H}_{17}\text{O}_3$   $[\text{M}+\text{H}]^+$  245.1172, found 245.1166.

### Ethyl (*E*)-3-(2-cinnamoylphenyl)acrylate (**3ra**):

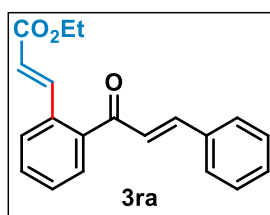

25 mg (40%); Yellow semi-solid;  $^1\text{H NMR}$  (500 MHz,  $\text{CDCl}_3$ )  $\delta$  7.94 (d,  $J = 15.9$  Hz, 1H), 7.70 (dd,  $J = 7.9, 1.4$  Hz, 1H), 7.60 (dd,  $J = 7.6, 1.5$  Hz, 1H), 7.57 – 7.54 (m, 2H), 7.52 – 7.45 (m, 3H), 7.43 – 7.38 (m, 3H), 7.16 (d,  $J = 16.2$  Hz, 1H), 6.39 (d,  $J = 15.9$  Hz, 1H), 4.22 (q,  $J = 7.1$  Hz, 2H), 1.28 (t,  $J = 7.1$  Hz, 3H);  $^{13}\text{C NMR}$  (125 MHz,  $\text{CDCl}_3$ )  $\delta$  195.0, 166.4, 146.8, 142.2, 139.8, 134.4, 133.9, 130.98, 130.92, 129.4, 129.0, 128.6, 128.5, 127.5, 126.3, 121.0, 60.5, 14.2; IR (KBr)  $\nu$   $\text{cm}^{-1}$  3474, 3415, 2982, 1711, 1637, 1600, 1574, 1448, 1366, 1314, 1274, 1179, 1031, 978, 865, 764, 681, 569, 484. HRMS (Q-TOF, ESI) calcd for  $\text{C}_{20}\text{H}_{19}\text{O}_3^+$   $[\text{M}+\text{H}]^+$  307.1329, found 307.1322.

### Methyl (*E*)-3-(5-methyl-2-((*E*)-4,4,4-trifluorobut-2-enoyl)phenyl)acrylate (**3ab**):

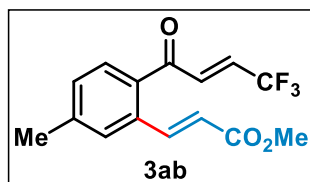

48 mg (80%); Off white solid; mp = 44–46 °C;  $^1\text{H NMR}$  (500 MHz,  $\text{CDCl}_3$ )  $\delta$  8.06 (d,  $J = 15.9$  Hz, 1H), 7.62 (d,  $J = 7.9$  Hz, 1H), 7.48 (d,  $J = 2.0$  Hz, 1H), 7.33 (dd,  $J = 8.5, 1.7$  Hz, 1H), 7.32 – 7.27 (m, 1H), 6.71 (dq,  $J_{\text{H-H}} = 15.7, J_{\text{H-F}} = 6.6$  Hz, 1H), 6.35 (d,  $J = 15.9$  Hz, 1H), 3.83 (s, 3H), 2.47 (s, 3H);  $^{13}\text{C NMR}$  (125 MHz,  $\text{CDCl}_3$ )  $\delta$  190.2, 166.7, 143.8, 143.0, 135.7, 134.0, 133.6 (q,  $^3J_{\text{C-F}} = 5.4$  Hz), 130.8 (q,  $^2J_{\text{C-F}} = 35.1$  Hz), 130.2, 129.7, 129.2, 123.5 (q,  $^1J_{\text{C-F}} = 268.6$  Hz), 121.2, 51.8, 21.6;  $^{19}\text{F NMR}$  (470 MHz,  $\text{CDCl}_3$ )  $\delta$  -65.1; IR (KBr)  $\nu$   $\text{cm}^{-1}$  3475, 3414, 2958, 2925, 2853, 1718, 1641, 1490, 1434, 1171, 1305, 1279, 1171, 1125, 979, 890, 683, 652, 602, 579; HRMS (Q-TOF, ESI) calcd for  $\text{C}_{15}\text{H}_{14}\text{F}_3\text{O}_3^+$   $[\text{M}+\text{H}]^+$  299.0890, found 299.0896.

### Butyl (*E*)-3-(5-methyl-2-((*E*)-4,4,4-trifluorobut-2-enoyl)phenyl)acrylate (**3ac**):

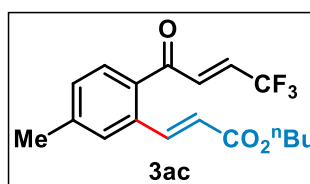

34 mg (50%); Light yellow semi-solid;  $^1\text{H NMR}$  (500 MHz, DMSO)  $\delta$  8.05 (d,  $J = 15.9$  Hz, 1H), 7.62 (d,  $J = 7.9$  Hz, 1H), 7.50 (d,  $J = 2.0$  Hz, 1H), 7.33 (dd,  $J = 7.9, 2.4$  Hz, 1H), 7.31 (dq,  $J_{\text{H-H}} = 15.7, J_{\text{H-F}} = 2.0$  Hz, 1H), 6.72 (dq,  $J_{\text{H-H}} = 15.7, J_{\text{H-F}} = 6.6$  Hz, 1H), 6.36 (d,  $J = 15.9$  Hz, 1H), 4.24 (t,  $J = 6.7$  Hz, 2H), 2.47 (s, 3H), 1.73-1.68 (m, 2H), 1.49-1.41 (m, 2H), 0.98 (t,  $J = 7.4$  Hz, 3H);  $^{13}\text{C NMR}$  (125 MHz, DMSO)  $\delta$  190.3, 166.4, 143.7, 142.7, 135.7, 134.1, 133.6 (q,  $^3J_{\text{C-F}} = 5.9$  Hz), 130.8 (q,  $^2J_{\text{C-F}} = 35.1$  Hz), 130.2, 129.7, 129.2, 123.5 (q,  $^1J_{\text{C-F}} = 268.6$  Hz), 121.7, 64.6, 30.7, 21.6, 19.1, 13.7;  $^{19}\text{F NMR}$  (470 MHz, DMSO)  $\delta$  -65.0; IR (KBr)  $\nu$   $\text{cm}^{-1}$  2959, 2926, 2854, 1716, 1686, 1641, 1603, 1490, 1463, 1303, 1278, 1224, 1175, 1138, 972, 891, 847, 833, 655, 601, 438; HRMS (Q-TOF, ESI) calcd for  $\text{C}_{18}\text{H}_{20}\text{F}_3\text{O}_3^+$   $[\text{M}+\text{H}]^+$  341.1359, found 341.1351.

### Isobutyl (*E*)-3-(5-methyl-2-((*E*)-4,4,4-trifluorobut-2-enoyl)phenyl)acrylate (**3ad**):

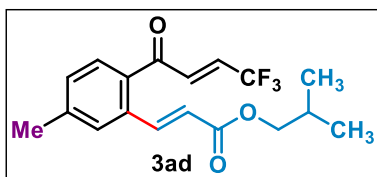

54 mg (79%); White solid; mp = 59–61 °C;  $^1\text{H NMR}$  (500 MHz,  $\text{CDCl}_3$ )  $\delta$  8.06 (d,  $J$  = 15.9 Hz, 1H), 7.62 (d,  $J$  = 7.9 Hz, 1H), 7.50 (d,  $J$  = 2.1 Hz, 1H), 7.33 (dd,  $J$  = 7.9, 1.8 Hz, 1H), 7.29 (dq,  $J_{\text{H-H}}$  = 15.7,  $J_{\text{H-F}}$  = 2.0 Hz, 1H), 6.71 (dq,  $J_{\text{H-H}}$  = 15.7,  $J_{\text{H-F}}$  = 6.6 Hz, 1H), 6.37 (d,  $J$  = 15.9 Hz, 1H), 4.02 (d,  $J$  = 6.7 Hz, 2H), 2.47 (s, 3H), 2.09-1.98 (m, 1H), 1.01 (d,  $J$  = 6.7 Hz, 6H);  $^{13}\text{C NMR}$  (125 MHz,  $\text{CDCl}_3$ )  $\delta$  190.3, 166.3, 143.7, 142.7, 135.7, 134.1, 133.6 (q,  $^3J_{\text{C-F}}$  = 5.4 Hz), 130.7 (q,  $^2J_{\text{C-F}}$  = 34.7 Hz), 130.2, 129.7, 129.1, 123.5 (q,  $^1J_{\text{C-F}}$  = 269.1 Hz), 121.7, 70.8, 27.8, 21.6, 19.1;  $^{19}\text{F NMR}$  (470 MHz,  $\text{CDCl}_3$ )  $\delta$  -65.1; IR (KBr)  $\nu$   $\text{cm}^{-1}$  3412, 3085, 2965, 1707, 1685, 1639, 1305, 1269, 1227, 1132, 1031, 984, 816, 655; HRMS (Q-TOF, ESI) calcd for  $\text{C}_{18}\text{H}_{20}\text{F}_3\text{O}_3^+$   $[\text{M}+\text{H}]^+$  341.1359, found 341.1351.

### Pentyl (*E*)-3-(5-methyl-2-((*E*)-4,4,4-trifluorobut-2-enoyl)phenyl)acrylate (**3ae**):

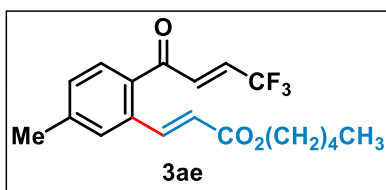

37 mg (52%); Yellow semi-solid;  $^1\text{H NMR}$  (500 MHz,  $\text{CDCl}_3$ )  $\delta$  8.03 (d,  $J$  = 15.9 Hz, 1H), 7.59 (d,  $J$  = 7.9 Hz, 1H), 7.48 (d,  $J$  = 2.0 Hz, 1H), 7.31 (dd,  $J$  = 7.9, 2.4 Hz, 1H), 7.27 (dq,  $J_{\text{H-H}}$  = 15.7,  $J_{\text{H-F}}$  = 2.0 Hz, 1H), 6.69 (dq,  $J_{\text{H-H}}$  = 15.7,  $J_{\text{H-F}}$  = 6.5 Hz, 1H), 6.34 (d,  $J$  = 15.9 Hz, 1H), 4.20 (t,  $J$  = 6.8 Hz, 3H), 2.45 (s, 3H), 1.73 – 1.68 (m, 1H), 1.39 – 1.36 (m, 4H), 0.93 – 0.91 (m, 3H);  $^{13}\text{C NMR}$  (125 MHz,  $\text{CDCl}_3$ )  $\delta$  190.3, 166.3, 143.6, 142.6, 135.7, 134.1, 133.7 (q,  $^3J_{\text{C-F}}$  = 5.4 Hz), 130.6 (q,  $^2J_{\text{C-F}}$  = 35.1 Hz), 130.1, 129.6, 129.1, 123.5 (q,  $^1J_{\text{C-F}}$  = 268.6 Hz), 121.8, 64.8, 28.3, 28.0, 22.3, 21.5, 13.9;  $^{19}\text{F NMR}$  (470 MHz,  $\text{CDCl}_3$ )  $\delta$  -65.1; IR (KBr)  $\nu$   $\text{cm}^{-1}$  2957, 2933, 2873, 1715, 1686, 1641, 1603, 1490, 1303, 1278, 1224, 1175, 1137, 1048, 971, 864, 825, 654, 600, 439; HRMS (Q-TOF, ESI) calcd for  $\text{C}_{19}\text{H}_{22}\text{F}_3\text{O}_3^+$   $[\text{M}+\text{H}]^+$  354.1443, found 354.1435.

### Dodecyl (*E*)-3-(5-methyl-2-((*E*)-4,4,4-trifluorobut-2-enoyl)phenyl)acrylate (**3af**):

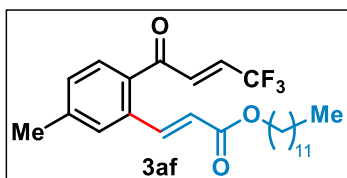

54 mg (60%); White solid; mp = 47–49 °C;  $^1\text{H NMR}$  (500 MHz,  $\text{CDCl}_3$ )  $\delta$  8.03 (d,  $J$  = 15.9 Hz, 1H), 7.60 (d,  $J$  = 7.9 Hz, 1H), 7.47 (d,  $J$  = 1.8 Hz, 1H), 7.31 (dd,  $J$  = 7.9, 2.3 Hz, 1H), 7.30 (dq,  $J_{\text{H-H}}$  = 15.7,  $J_{\text{H-F}}$  = 2.0 Hz, 1H), 6.71 (dq,  $J_{\text{H-H}}$  = 15.7,  $J_{\text{H-F}}$  = 6.6 Hz, 1H), 6.34 (d,  $J$  = 15.9 Hz, 1H), 4.20 (t,  $J$  = 6.8 Hz, 2H), 2.44 (s, 3H), 1.72 – 1.66 (m, 2H), 1.41-1.35 (m, 2H), 1.31-1.25 (m, 16H), 0.90 (t,  $J$  = 7.0 Hz, 3H);  $^{13}\text{C NMR}$  (125 MHz,  $\text{CDCl}_3$ )  $\delta$  190.2, 166.4, 143.7, 142.7, 135.7, 134.1, 133.6 (q,  $^3J_{\text{C-F}}$  = 5.4 Hz), 130.8 (q,  $^2J_{\text{C-F}}$  = 35.1 Hz), 130.1, 129.7, 129.2, 123.5 (q,  $^1J_{\text{C-F}}$  = 269.0 Hz), 121.7, 64.9, 31.9, 29.67, 29.65, 29.60, 29.5, 29.37, 29.30, 28.6, 25.9, 22.7, 21.6, 14.1;  $^{19}\text{F NMR}$  (470 MHz,  $\text{CDCl}_3$ )  $\delta$  -65.0; IR (KBr)  $\nu$   $\text{cm}^{-1}$  3474, 2916, 2849, 1716, 1684, 1650, 1631, 1313, 1281, 1119, 972, 817, 780, 720, 579; HRMS (Q-TOF, ESI) calcd for  $\text{C}_{26}\text{H}_{36}\text{F}_3\text{O}_3^+$   $[\text{M}+\text{H}]^+$  453.2611, found 453.2602.

**Octadecyl (*E*)-3-(5-methyl-2-((*E*)-4,4,4-trifluorobut-2-enoyl)phenyl)acrylate (3ag):**

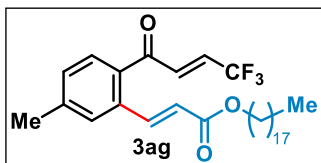

48 mg (45%); White solid; mp = 65–67 °C; <sup>1</sup>H NMR (500 MHz, CDCl<sub>3</sub>) δ 8.02 (d, *J* = 15.9 Hz, 1H), 7.59 (d, *J* = 7.8 Hz, 1H), 7.47 (d, *J* = 1.8 Hz, 1H), 7.31 (dd, *J* = 7.9, 2.4 Hz, 1H), 7.27 (dq, *J*<sub>H-H</sub> = 15.7, *J*<sub>H-F</sub> = 1.9 Hz, 1H), 6.67 (dq, *J*<sub>H-H</sub> = 15.7, *J*<sub>H-F</sub> = 6.6 Hz, 1H), 6.33 (d, *J* = 15.9 Hz, 1H); 4.20 (t, *J* = 6.8 Hz, 2H), 2.45 (s, 3H), 1.70 (p, *J* = 6.8 Hz, 2H), 1.40 – 1.24 (m, 30H), 0.88 (t, *J* = 7.0 Hz, 3H); <sup>13</sup>C NMR (125 MHz, CDCl<sub>3</sub>) δ 190.3, 166.4, 143.7, 142.7, 135.7, 134.1, 133.6 (q, <sup>3</sup>*J*<sub>C-F</sub> = 5.4 Hz), 130.5 (q, <sup>2</sup>*J*<sub>C-F</sub> = 34.7 Hz), 130.1, 129.7, 129.1, 123.5 (q, <sup>1</sup>*J*<sub>C-F</sub> = 268.6 Hz), 121.8, 64.9, 31.9, 29.71, 29.67, 29.60, 29.55, 29.37, 29.30, 28.68, 25.9, 22.7, 21.6, 14.1; <sup>19</sup>F NMR (470 MHz, CDCl<sub>3</sub>) δ -65.0; IR (KBr)  $\nu$  cm<sup>-1</sup> 3414, 2917, 1716, 1684, 1632, 1632, 1617, 1312, 1281, 972, 868, 817, 720, 655; HRMS (Q-TOF, ESI) calcd for C<sub>32</sub>H<sub>48</sub>F<sub>3</sub>O<sub>3</sub><sup>+</sup> [M+H]<sup>+</sup> 537.3550, found 537.3542.

**Benzyl (*E*)-3-(5-methyl-2-((*E*)-4,4,4-trifluorobut-2-enoyl)phenyl)acrylate (3ah):**

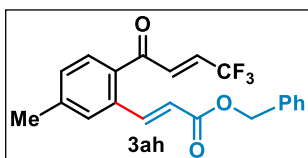

57 mg (76%); Light yellow solid; mp = 59–62 °C; <sup>1</sup>H NMR (500 MHz, DMSO) δ 8.05 (d, *J* = 15.9 Hz, 1H), 7.86 (d, *J* = 7.9 Hz, 1H), 7.76 (d, *J* = 1.8 Hz, 1H), 7.61 (dq, *J*<sub>H-H</sub> = 15.7, *J*<sub>H-F</sub> = 2.1 Hz, 1H), 7.43–7.34 (m, 6H), 6.92 (dq, *J*<sub>H-H</sub> = 15.7, *J*<sub>H-F</sub> = 7.0 Hz, 1H), 6.60 (d, *J* = 15.9 Hz, 1H), 5.23 (s, 2H), 2.4 (s, 3H); <sup>13</sup>C NMR (125 MHz, DMSO) δ 190.8, 166.2, 144.12, 144.10, 136.6, 135.6 (q, <sup>3</sup>*J*<sub>C-F</sub> = 5.4 Hz), 135.0, 134.1, 131.1, 130.9, 129.5, 129.0 (q, <sup>2</sup>*J*<sub>C-F</sub> = 33.8 Hz), 128.9, 128.6, 128.5, 124.4 (q, <sup>1</sup>*J*<sub>C-F</sub> = 268.6 Hz), 120.6, 66.1, 21.4; <sup>19</sup>F NMR (470 MHz, DMSO) δ -63.3; IR (KBr)  $\nu$  cm<sup>-1</sup> 3477, 3068, 2925, 1707, 1784, 1379, 1301, 1271, 1224, 1138, 1002, 878, 654, 614; HRMS (Q-TOF, ESI) calcd for C<sub>21</sub>H<sub>18</sub>F<sub>3</sub>O<sub>3</sub><sup>+</sup> [M+H]<sup>+</sup> 375.1203, found 375.1213.

**(*E*)-4,4,4-Trifluoro-1-(4-methyl-2-((*E*)-2-(phenylsulfonyl)vinyl)phenyl)but-2-en-1-one**

**(3ai):**

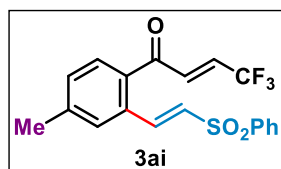

38 mg (50%); Light yellow solid; mp = 112–114 °C; <sup>1</sup>H NMR (500 MHz, CDCl<sub>3</sub>) δ 8.10 (d, *J* = 15.4 Hz, 1H), 8.04 – 8.03 (m, 1H), 8.03 – 8.02 (m, 1H), 7.65 (d, *J* = 7.8 Hz, 1H), 7.64 – 7.61 (m, 1H), 7.59 – 7.56 (m, 2H), 7.38 (d, *J* = 1.8 Hz, 1H), 7.36 (d, *J* = 2.6 Hz, 1H), 7.34–7.30 (m, 1H), 6.78–6.71 (m, 2H), 2.43 (s, 3H); <sup>13</sup>C NMR (125 MHz, CDCl<sub>3</sub>) δ 189.4, 144.3, 142.1, 132.8 (q, <sup>3</sup>*J*<sub>C-F</sub> = 5.4 Hz), 131.1 (q, <sup>2</sup>*J*<sub>C-F</sub> = 35.1 Hz), 130.9, 130.1, 129.9, 129.7, 129.3, 127.8, 123.4 (q, <sup>1</sup>*J*<sub>C-F</sub> = 269.0 Hz), 21.5; <sup>19</sup>F NMR (470 MHz, CDCl<sub>3</sub>) δ -65.0; IR (KBr)  $\nu$  cm<sup>-1</sup> 3476, 3053, 2924, 1682, 1639, 1615, 1086, 983, 967, 909, 715, 622, 591, 544; HRMS (Q-TOF, ESI) calcd for C<sub>19</sub>H<sub>16</sub>F<sub>3</sub>O<sub>3</sub>S<sup>+</sup> [M+H]<sup>+</sup> 381.0767, found 381.0760.

**2,2,2-Trifluoroethyl (E)-3-(5-methyl-2-((E)-4,4,4-trifluorobut-2-enoyl)phenyl)acrylate (3aj):**

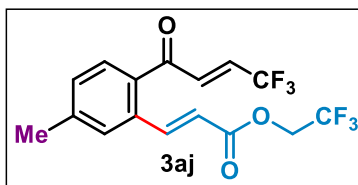

44 mg (60%); White solid; mp = 62-63 °C;  $^1\text{H NMR}$  (500 MHz,  $\text{CDCl}_3$ )  $\delta$  8.17 (d,  $J$  = 15.9 Hz, 1H), 7.64 (d,  $J$  = 7.9 Hz, 1H), 7.49 (d,  $J$  = 2.0 Hz, 1H), 7.35 (dd,  $J$  = 7.9, 2.4 Hz, 1H), 7.30 (dq,  $J_{\text{H-H}}$  = 15.6,  $J_{\text{H-F}}$  = 1.9 Hz, 1H), 6.71 (dq,  $J_{\text{H-H}}$  = 15.6,  $J_{\text{H-F}}$  = 6.6 Hz, 1H), 6.39 (d,  $J$  = 15.9 Hz, 1H), 4.60 (q,  $J$  = 8.5 Hz, 2H), 2.46 (s, 3H);  $^{13}\text{C NMR}$  (125 MHz,  $\text{CDCl}_3$ )  $\delta$  189.9, 164.5, 145.6, 144.0, 135.3, 134.1, 133.2 (q,  $^3J_{\text{C-F}}$  = 5.9 Hz), 131.0 (q,  $^2J_{\text{C-F}}$  = 35.1 Hz), 130.7, 129.8, 129.3, 124.1 (q,  $^1J_{\text{C-F}}$  = 275 Hz), 123.4 (q,  $^1J_{\text{C-F}}$  = 268.6 Hz), 119.1, 60.6 (q,  $^2J_{\text{C-F}}$  = 36.1 Hz), 21.6;  $^{19}\text{F NMR}$  (470 MHz,  $\text{CDCl}_3$ )  $\delta$  -65.1, -73.7; IR (KBr)  $\nu$   $\text{cm}^{-1}$  3412, 2963, 1722, 1686, 1642, 1307, 1263, 1225, 1179, 1158, 801, 673, 650; HRMS (Q-TOF, ESI) calcd for  $\text{C}_{16}\text{H}_{13}\text{F}_6\text{O}_3$   $[\text{M}+\text{H}]^+$  367.0763, found 367.0760.

**1,1,1,3,3,3-hexafluoropropan-2-yl(E)-3-(5-methyl-2-((E)-4,4,4-trifluorobut-2-enoyl)phenyl)acrylate (3ak):**

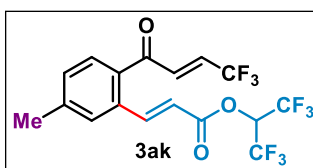

66 mg (76%); Off white solid; mp = 111–113 °C;  $^1\text{H NMR}$  (500 MHz,  $\text{CDCl}_3$ )  $\delta$  8.32 (d,  $J$  = 15.9 Hz, 1H), 7.69 (d,  $J$  = 7.9 Hz, 1H), 7.55 (d,  $J$  = 2.0 Hz, 1H), 7.41 (dd,  $J$  = 7.9, 2.4 Hz, 1H), 7.34 (dq,  $J_{\text{H-H}}$  = 15.7,  $J_{\text{H-F}}$  = 2.0 Hz, 1H), 6.75 (dq,  $J_{\text{H-H}}$  = 15.6,  $J_{\text{H-F}}$  = 6.6 Hz, 1H), 6.46 (d,  $J$  = 15.7 Hz, 1H), 5.93 (hept,  $J$  = 6.1 Hz, 1H), 2.50 (s, 3H);  $^{13}\text{C NMR}$  (125 MHz,  $\text{CDCl}_3$ )  $\delta$  189.7, 162.8, 148.0, 144.1, 134.8, 134.2, 133.1 (q,  $^3J_{\text{C-F}}$  = 5.4 Hz), 131.2 (q,  $^2J_{\text{C-F}}$  = 35.1 Hz), 131.1, 129.9, 129.4, 123.9 (q,  $^1J_{\text{C-F}}$  = 282.7 Hz), 123.4 (q,  $^1J_{\text{C-F}}$  = 268.6 Hz), 117.3, 66.6 (q,  $^2J_{\text{C-F}}$  = 34.7 Hz), 21.6;  $^{19}\text{F NMR}$  (470 MHz,  $\text{CDCl}_3$ )  $\delta$  -65.2, -73.2; IR (KBr)  $\nu$   $\text{cm}^{-1}$  3551, 2982, 1745, 1685, 1632, 1364, 1278, 1231, 1201, 1110, 1084, 909, 689, 598; HRMS (Q-TOF, ESI) calcd for  $\text{C}_{17}\text{H}_{12}\text{F}_9\text{O}_3$   $[\text{M}+\text{H}]^+$  435.0637, found 435.0630.

**(1S)-1,7,7-Trimethylbicyclo[2.2.1]heptan-2-yl (E)-3-(5-methyl-2-((E)-4,4,4-trifluorobut-2-enoyl)phenyl)acrylate (3al):**

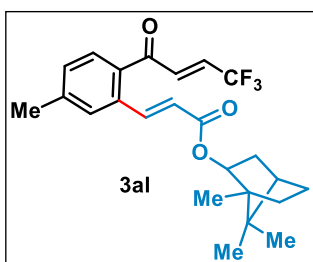

34 mg (40%); White solid; mp = 148–151 °C;  $^1\text{H NMR}$  (500 MHz,  $\text{CDCl}_3$ )  $\delta$  8.01 (d,  $J$  = 15.9 Hz, 1H), 7.60 (d,  $J$  = 7.9 Hz, 1H), 7.50 (d,  $J$  = 1.8 Hz, 1H), 7.32 (dd,  $J$  = 7.9, 2.4 Hz, 1H), 6.69 (dq,  $J_{\text{H-H}}$  = 15.7,  $J_{\text{H-F}}$  = 2.0 Hz, 1H), 6.69 (dq,  $J_{\text{H-H}}$  = 15.7,  $J_{\text{H-F}}$  = 6.6 Hz, 1H), 6.33 (d,  $J$  = 15.9 Hz, 1H), 4.82 (dd,  $J$  = 7.4, 4.2 Hz, 1H), 2.47 (s, 3H), 1.89-1.86 (m, 1H), 1.80-1.78 (m, 1H), 1.75-1.71 (m, 1H), 1.63-1.57 (m, 2H), 1.25-1.19 (m, 1H), 1.16-1.11 (m, 1H), 1.07 (s, 3H), 0.92 (s, 3H), 0.88 (s, 3H);  $^{13}\text{C NMR}$  (125 MHz,  $\text{CDCl}_3$ )  $\delta$  190.4, 165.8, 143.6, 142.3, 135.6, 134.1, 133.7 (q,  $^3J_{\text{C-F}}$  = 5.4 Hz),

130.7 (q,  $^2J_{C-F} = 35.1$  Hz), 130.1, 129.6, 129.0, 123.5 (q,  $^1J_{C-F} = 268.6$  Hz), 121.3, 81.3, 48.9, 47.0, 45.0, 38.8, 33.7, 27.0, 21.6, 20.1, 19.9, 11.5;  $^{19}\text{F}$  NMR (470 MHz,  $\text{CDCl}_3$ )  $\delta$  -65.1; IR (KBr)  $\nu \text{ cm}^{-1}$  3478, 2955, 2874, 1703, 1608, 1475, 1455, 1371, 1318, 1244, 1155, 1051, 1022, 962, 625; HRMS (Q-TOF, ESI) calcd for  $\text{C}_{24}\text{H}_{28}\text{F}_3\text{O}_3$   $[\text{M}+\text{H}]^+$  421.1985, found 421.1980.

**(8R,9S,13S,14S)-13-methyl-17-oxo-7,8,9,11,12,13,14,15,16,17-decahydro-6H-cyclopenta[a]phenanthren-3-yl(E)-3-(5-methyl-2-((E)-4,4,4-trifluorobut-2-enoyl)phenyl)acrylate (3am):**

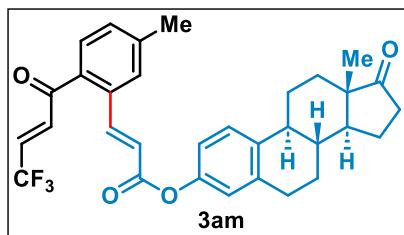

37 mg (35%); White solid; mp = 118–122 °C;  $^1\text{H}$  NMR (500 MHz,  $\text{CDCl}_3$ )  $\delta$  8.22 (d,  $J = 15.9$  Hz, 1H), 7.64 (d,  $J = 7.9$  Hz, 1H), 7.54 (d,  $J = 1.8$  Hz, 1H), 7.35 (dd,  $J = 7.7, 2.2$  Hz, 1H), 7.33–7.28 (m, 2H), 6.94 (d,  $J = 8.5$  Hz, 1H), 6.90 (d,  $J = 2.6$  Hz, 1H), 6.71 (dq,  $J_{H-H} = 15.7, J_{H-F} = 6.6$  Hz, 1H), 6.51 (d,  $J = 15.9$  Hz, 1H), 2.93–2.91 (m, 2H), 2.54–2.50 (m, 1H), 2.47 (s, 3H), 2.43–2.40 (m, 1H), 2.35–2.27 (m, 1H), 2.18–2.11 (m, 1H), 2.09–2.01 (m, 2H), 1.98–1.96 (m, 1H), 1.67–1.58 (m, 3H), 1.54–1.42 (m, 4H), 0.9 (s, 3H);  $^{13}\text{C}$  NMR (125 MHz,  $\text{CDCl}_3$ )  $\delta$  190.1, 165.0, 148.6, 144.6, 143.9, 138.0, 137.4, 135.5, 134.1, 133.5 (q,  $^3J_{C-F} = 5.9$  Hz), 130.9 (q,  $^2J_{C-F} = 35.1$  Hz), 130.5, 129.8, 129.4, 126.4, 123.5 (q,  $^1J_{C-F} = 269.1$  Hz), 121.6, 120.8, 118.8, 50.4, 47.9, 44.1, 38.0, 35.8, 31.5, 29.4, 26.3, 25.7, 21.69, 21.61, 13.8;  $^{19}\text{F}$  NMR (470 MHz,  $\text{CDCl}_3$ )  $\delta$  -65.0; IR (KBr)  $\nu \text{ cm}^{-1}$  3413, 2926, 1738, 1686, 1637, 1493, 1308, 1278, 1223, 1138, 970, 656; HRMS (Q-TOF, ESI) calcd for  $\text{C}_{32}\text{H}_{32}\text{F}_3\text{O}_3$   $[\text{M}+\text{H}]^+$  537.2247, found 537.2240.

**2-Oxo-2H-chromen-7-yl(E)-3-(5-methyl-2-((E)-4,4,4-trifluorobut-2-enoyl)phenyl)acrylate (3an):**

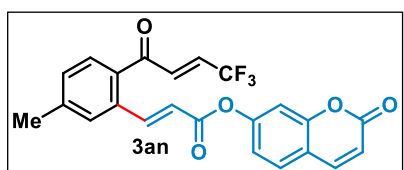

38 mg (44%); Light yellow solid; mp = 159–161 °C;  $^1\text{H}$  NMR (500 MHz,  $\text{DMSO}$ )  $\delta$  8.23 (d,  $J = 15.9$  Hz, 1H), 8.08 (d,  $J = 9.6$  Hz, 1H), 7.91 (d,  $J = 7.9$  Hz, 1H), 7.83 (s, 1H), 7.80 (d,  $J = 8.5$  Hz, 1H), 7.63 (dq,  $J_{H-H} = 15.7, J_{H-F} = 2.1$  Hz, 1H), 7.46 (dd,  $J = 8.1, 2.0$  Hz, 1H), 7.36 (d,  $J = 2.3$  Hz, 1H), 7.24 (dd,  $J = 8.4, 2.3$  Hz, 1H), 6.93 (dq,  $J_{H-H} = 15.7, J_{H-F} = 6.8$  Hz, 1H), 6.81 (d,  $J = 15.8$  Hz, 1H), 6.49 (d,  $J = 9.6$  Hz, 1H), 2.44 (s, 3H);  $^{13}\text{C}$  NMR (125 MHz,  $\text{DMSO}$ )  $\delta$  195.4, 169.4, 164.9, 159.3, 157.9, 151.1, 149.04, 149.02, 140.2 (q,  $^3J_{C-F} = 5.9$  Hz), 139.5, 139.0, 136.1, 135.9, 134.6, 134.4, 134.1 (q,  $^2J_{C-F} = 33.8$  Hz), 129.2 (q,  $^1J_{C-F} = 269.1$  Hz), 124.1, 123.8, 121.9, 120.8, 115.3, 26.2;  $^{19}\text{F}$  NMR (470 MHz,  $\text{DMSO}$ )  $\delta$  -65.0; IR (KBr)  $\nu \text{ cm}^{-1}$  3467, 3066, 2924, 1731, 1614, 1561, 1491, 1400, 1327, 1306, 1283, 1232, 1133, 991, 877, 843, 704, 654, 601, 459, 444; HRMS (Q-TOF, ESI) calcd for  $\text{C}_{24}\text{H}_{19}\text{F}_3\text{O}_5$   $[\text{M}+\text{H}]^+$  429.0944, found 429.0942.



**3-((*E*)-5-Methyl-2-((*E*)-4,4,4-trifluorobut-2-enoyl)benzylidene)dihydrofuran-2(3*H*)-one**  
**(3ao):**

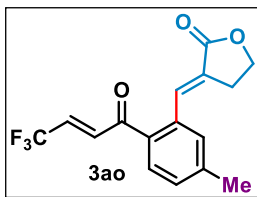

32 mg (52%); Yellow semi-solid;  $^1\text{H NMR}$  (500 MHz,  $\text{CDCl}_3$ )  $\delta$  7.81 (t,  $J$  = 3.0 Hz, 1H), 7.66 (d,  $J$  = 7.8 Hz, 1H), 7.33 (dd,  $J$  = 9.7, 2.1 Hz, 2H), 7.30 (dq,  $J_{\text{H-H}}$  = 15.6,  $J_{\text{H-F}}$  = 2 Hz, 1H), 6.70 (dq,  $J_{\text{H-H}}$  = 15.7,  $J_{\text{H-F}}$  = 6.6 Hz, 1H), 4.43 (t,  $J$  = 7.2 Hz, 2H), 3.12 (td,  $J$  = 7.2, 3.1 Hz, 2H), 2.47 (s, 3H);  $^{13}\text{C NMR}$  (125 MHz,  $\text{CDCl}_3$ )  $\delta$  189.9, 171.5, 143.5, 135.5, 135.2, 134.5, 133.2 (q,  $^3J_{\text{C-F}}$  = 5.4 Hz), 131.0 (q,  $^2J_{\text{C-F}}$  = 35.1 Hz), 130.1, 129.9, 129.7, 126.2, 123.4 (q,  $^1J_{\text{C-F}}$  = 268.6 Hz), 65.6, 27.1, 21.7;  $^{19}\text{F NMR}$  (470 MHz,  $\text{CDCl}_3$ )  $\delta$  -65.0; IR (KBr)  $\nu$   $\text{cm}^{-1}$  3443, 2988, 1743, 1682, 1648, 1308, 1195, 1126, 1050, 962, 893, 731, 662, 590; HRMS (Q-TOF, ESI) calcd for  $\text{C}_{16}\text{H}_{14}\text{F}_3\text{O}_3^+$   $[\text{M}+\text{H}]^+$  311.0890, found 311.0874.

**5. Procedure for Scale-Up (3aa):**

To an oven dried reaction tube equipped with magnetic stirring bar, added  $[\text{IrCp}^*\text{Cl}_2]_2$  (46.8 mg, 2.5 mol%), **1a** (500 mg, 2.33 mmol, 1 equiv), **2a** (467 mg, 4.66 mmol, 2 equiv),  $\text{Ag}_2\text{CO}_3$  (642 mg, 2.33 mmol, 1 equiv),  $\text{AgSbF}_6$  (80 mg, 10 mol%), HFIP (10 mL) and the mixture was stirred at 100 °C for 24 h. After reaction completion (monitored by Thin Layer Chromatography), the reaction mixture was passed through the celite pad and then purified by silica gel column chromatography (230-400 mesh) in Hexane/EtOAc (19:1) to get the desired olefinated product in 65% (477 mg) yield (**3aa**).

**6. Procedure for synthetic diversification:**

**6.1. Synthetic procedure for 2,2,2-trifluoroethyl (*E*)-3-(2-(3-ethoxy-3-oxoprop-1-en-1-yl)-4-methylphenyl)-9-methyl-9*H*-pyrrolo[1,2-*a*]indole-1-carboxylate (**5aa**):**

To the oven dried reaction tube with magnetic stir bar, 3-methylindole (**4**), (26 mg, 0.2 mmol), olefinated  $\beta$ - $\text{CF}_3$ -enone (**3aa**), (62.5 mg, 0.2 mmol), PTSA (3.5 mg, 10 mol%), followed by addition of 0.5 mL Trifluoroethanol (TFE). The reaction mixture was allowed to stir at 100 °C for 2 h. The completion of the reaction was monitored by TLC. The reaction mixture was diluted with EtOAc (3 mL) and concentrated under vacuum. The residue was purified using silica gel column chromatography (5% EtOAc/Hexane) to afford compound **5aa** in 40%. The compound is a mixture of diastereomers (atropisomers) having dr 1:1.

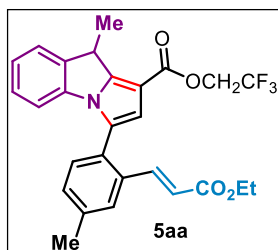

38 mg (40%); Light yellow semi-solid;  $^1\text{H NMR}$  (500 MHz,  $\text{CDCl}_3$ )  $\delta$  7.63 (d,  $J = 16$  Hz, 1H), 7.59 (d,  $J = 16$  Hz, 1H, *diastereomeric*), 7.61-7.60 (m, 1H), 7.40-7.33 (m, 2H), 7.28-7.26 (m, 1H), 7.10 (t,  $J = 7.8$ , Hz, 1H), 7.02 (t,  $J = 7.6$  Hz, 1H), 6.67 (s, 1H), 6.65 (s, 1H, *diastereomeric*), 6.51 (d,  $J = 7.9$  Hz, 1H), 6.49 (d,  $J = 7.9$  Hz, 1H, *diastereomeric*), 6.33 (d,  $J = 16.0$  Hz, 1H), 6.24 (d,  $J = 16.0$  Hz, 1H, *diastereomeric*), 4.77-4.64 (m, 2H), 4.35-4.28 (m, 1H), 4.18-4.09 (m, 2H), 2.50 (s, 3H), 1.71 (d,  $J = 7.3$  Hz, 3H), 1.25-1.19 (m, 3H);  $^{13}\text{C NMR}$  (125 MHz,  $\text{CDCl}_3$ )  $\delta$  166.6, 162.6, 142.2, 142.1, 140.9, 139.4, 139.2, 134.5, 131.7, 130.7, 129.2, 129.1, 127.5, 127.2, 125.3, 124.9, 124.8, 124.5, 119.8, 119.7, 116.2, 115.8, 111.94, 111.91, 107.5, 60.4, 60.3 (*diastereomeric*), 60.1 (q,  $^2J_{\text{C-F}} = 36.1$  Hz), 37.35, 37.31 (*diastereomeric*), 21.4, 17.5, 17.2, 14.1;  $^{19}\text{F NMR}$  (470 MHz,  $\text{CDCl}_3$ )  $\delta$  -73.42, -73.46 (*diastereomeric*); IR (KBr)  $\nu$   $\text{cm}^{-1}$  3475, 3415, 2933, 1721, 1637, 1617, 1571, 1469, 1313, 1278, 1167, 979, 839, 771, 750, 623, 481; HRMS (Q-TOF, ESI) calcd for  $\text{C}_{27}\text{H}_{25}\text{F}_3\text{NO}_4$   $[\text{M}+\text{H}]^+$  484.1731, found 484.1722

## 6.2. Synthetic procedure for Ethyl(*E*)-3-(5-methyl-2-(4,4,4-trifluoro-3-(1-(pyrimidin-2-yl)-1*H*-indol-2-yl)butanoyl)phenyl)acrylate (7aa):

To an oven-dried sealed tube with 1-(Pyrimidin-2-yl)-1*H*-indole (**6**) (39 mg, 0.2 mmol, 100 mol %), olefinated  $\beta$ - $\text{CF}_3$ -enone (**3aa**) (62.5 mg, 0.2 mmol, 100 mol %),  $[\text{RhCp}^*\text{Cl}_2]_2$  (1.2 mg, 0.002 mmol, 1 mol %) and  $\text{AgSbF}_6$  (2.7 mg, 0.008 mmol, 4 mol %) was added in DCE (1 mL). The reaction mixture was allowed to stir at 70  $^\circ\text{C}$  for 24 h. After cooling at room temperature, the reaction mixture was evaporated and the residue was purified by flash column chromatography ( $\text{SiO}_2$ : *n*-hexanes/EtOAc = 10:1) to provide **7aa** in 30% yield.

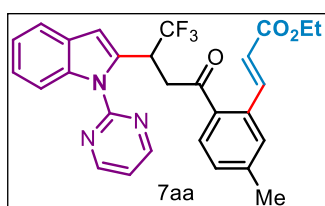

30 mg (30%); Light yellow semi-solid;  $^1\text{H NMR}$  (500 MHz,  $\text{DMSO-d}_6$ )  $\delta$  8.98 (d,  $J = 4.9$  Hz, 2H), 8.15 (d,  $J = 8.4$  Hz, 1H), 8.02 (d,  $J = 8.1$  Hz, 1H), 7.75 (d,  $J = 15.9$  Hz, 1H), 7.59 (dd,  $J = 7.8, 2.1$  Hz, 2H), 7.51 (t,  $J = 4.8$  Hz, 1H), 7.38 (dd,  $J = 8.2, 2.1$  Hz, 1H), 7.26-7.23 (m, 1H), 7.19-7.16 (m, 1H), 7.04 (s, 1H), 6.35 (d,  $J = 15.9$  Hz, 1H), 5.89 (td,  $J = 8.9, 5.0$  Hz, 1H), 4.09 (q,  $J = 7.0$  Hz, 2H), 4.02 (dd,  $J = 17.9, 9.2$  Hz, 1H), 3.81 (dd,  $J = 17.9, 5.2$  Hz, 1H), 2.37 (s, 3H), 1.17 (t,  $J = 7.1$  Hz, 3H);  $^{13}\text{C NMR}$  (125 MHz,  $\text{DMSO-d}_6$ )  $\delta$  198.9, 166.3, 159.4, 157.6, 143.8, 143.2, 136.9, 134.9, 134.3, 134.0, 130.8, 130.1, 129.3, 128.2, 124.0, 122.4, 120.9, 120.4, 119.0, 114.6, 107.9, 60.4, 21.3, 14.5;  $^{19}\text{F NMR}$  (470 MHz,  $\text{DMSO-d}_6$ )  $\delta$  -68.1; IR (KBr)  $\nu$   $\text{cm}^{-1}$  3550, 3475, 3415, 1713, 1636, 1617, 1565, 1454, 1425, 1314, 1278, 1228, 1158, 967, 748, 673, 623, 484; HRMS (Q-TOF, ESI) calcd for  $\text{C}_{28}\text{H}_{25}\text{F}_3\text{N}_3\text{O}_3^+$   $[\text{M}+\text{H}]^+$  508.1843, found 508.1840.

## 7. Mechanistic studies: H/D exchange Experiment

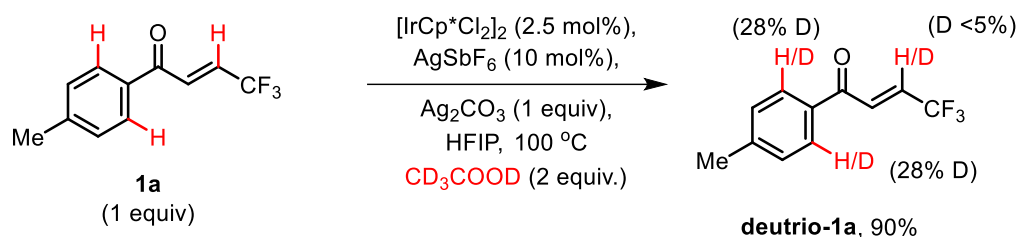

To an oven-dried sealed tube with (*E*)-4,4,4-Trifluoro-1-(4-methylphenyl)but-2-en-1-one (**1a**) (43 mg, 0.2 mmol, 100 mol %),  $[\text{IrCp}^*\text{Cl}_2]_2$  (4.0 mg, 0.005 mmol, 2.5 mol %),  $\text{AgSbF}_6$  (6.9 mg, 0.02 mmol, 10 mol %),  $\text{Ag}_2\text{CO}_3$  (55.1 mg, 0.2 mmol, 100 mol %) and acetic acid- $d_4$  (25 mg, 0.4 mmol) was added in HFIP (1 mL). The reaction mixture was allowed to stir at 100 °C for 24 h. After cooling at room temperature, the reaction mixture was evaporated and the residue was purified by column chromatography on silica gel (230-400 mesh) (eluent; hexane/EtOAc = 20:1) to provide desired *deuterio-1a* in 90 % yield with 28% incorporation of D at both ortho-position of aryl ring. .

### 7.1 Mechanistic studies: Intermolecular Competitive Experiment

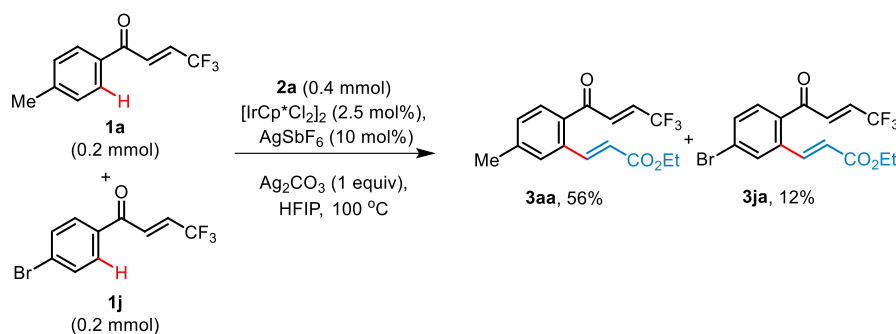

To an oven dried reaction tube equipped with magnetic stirring bar, was added  $[\text{IrCp}^*\text{Cl}_2]_2$  (4.0 mg, 2.5 mol%), (*E*)-4,4,4-Trifluoro-1-(4-methylphenyl)but-2-en-1-one (**1a**) (43 mg, 0.2 mmol, 1 equiv), (*E*)-4,4,4-Trifluoro-1-(4-bromophenyl)but-2-en-1-one (56 mg, 0.2 mmol, 1 equiv),  $\text{AgSbF}_6$  (6.9 mg, 0.02 mmol, 10 mol %),  $\text{Ag}_2\text{CO}_3$  (55.1 mg, 0.2 mmol, 100 mol %) and ethylacrylate (**2a**) (40 mg, 0.4 mmol, 200 mol%) in HFIP (1 mL). The reaction mixture was stirred at 100 °C for 24 h. After reaction completion (monitored by Thin Layer Chromatography), the reaction mixture was passed through the celite pad and then purified by silica gel column chromatography (230-400 mesh) in Hexane/EtOAc (20:1) to get the olefinated products **3aa** and **3ja** in 56% and 12% yield, respectively.

## 8. References

1. (a) Q. Jiang, T. Guo, K. Wu and Z. Yu, *Chem. Commun.*, 2016, **52**, 2913-2915; (b) B. Chaudhary, P. Auti, S.D. Shinde, P.A. Yakkala, D. Giri and S. Sharma, *Org. Lett.*, 2019, **21**, 2763-2767.
2. (a) X.Q. Chu, L.W. Sun, Y.L. Chen, J.W. Chen, X. Ying, M. Ma and Z.L. Shen, *Green Chem.*, 2022, **24**, 2777-2782; (b) Q. Sha, H. Liu, and Y. Wei, *Eur. J. Org. Chem.* 2014, **34**, 7707-7715.

## 9. NMR Spectra of all products:

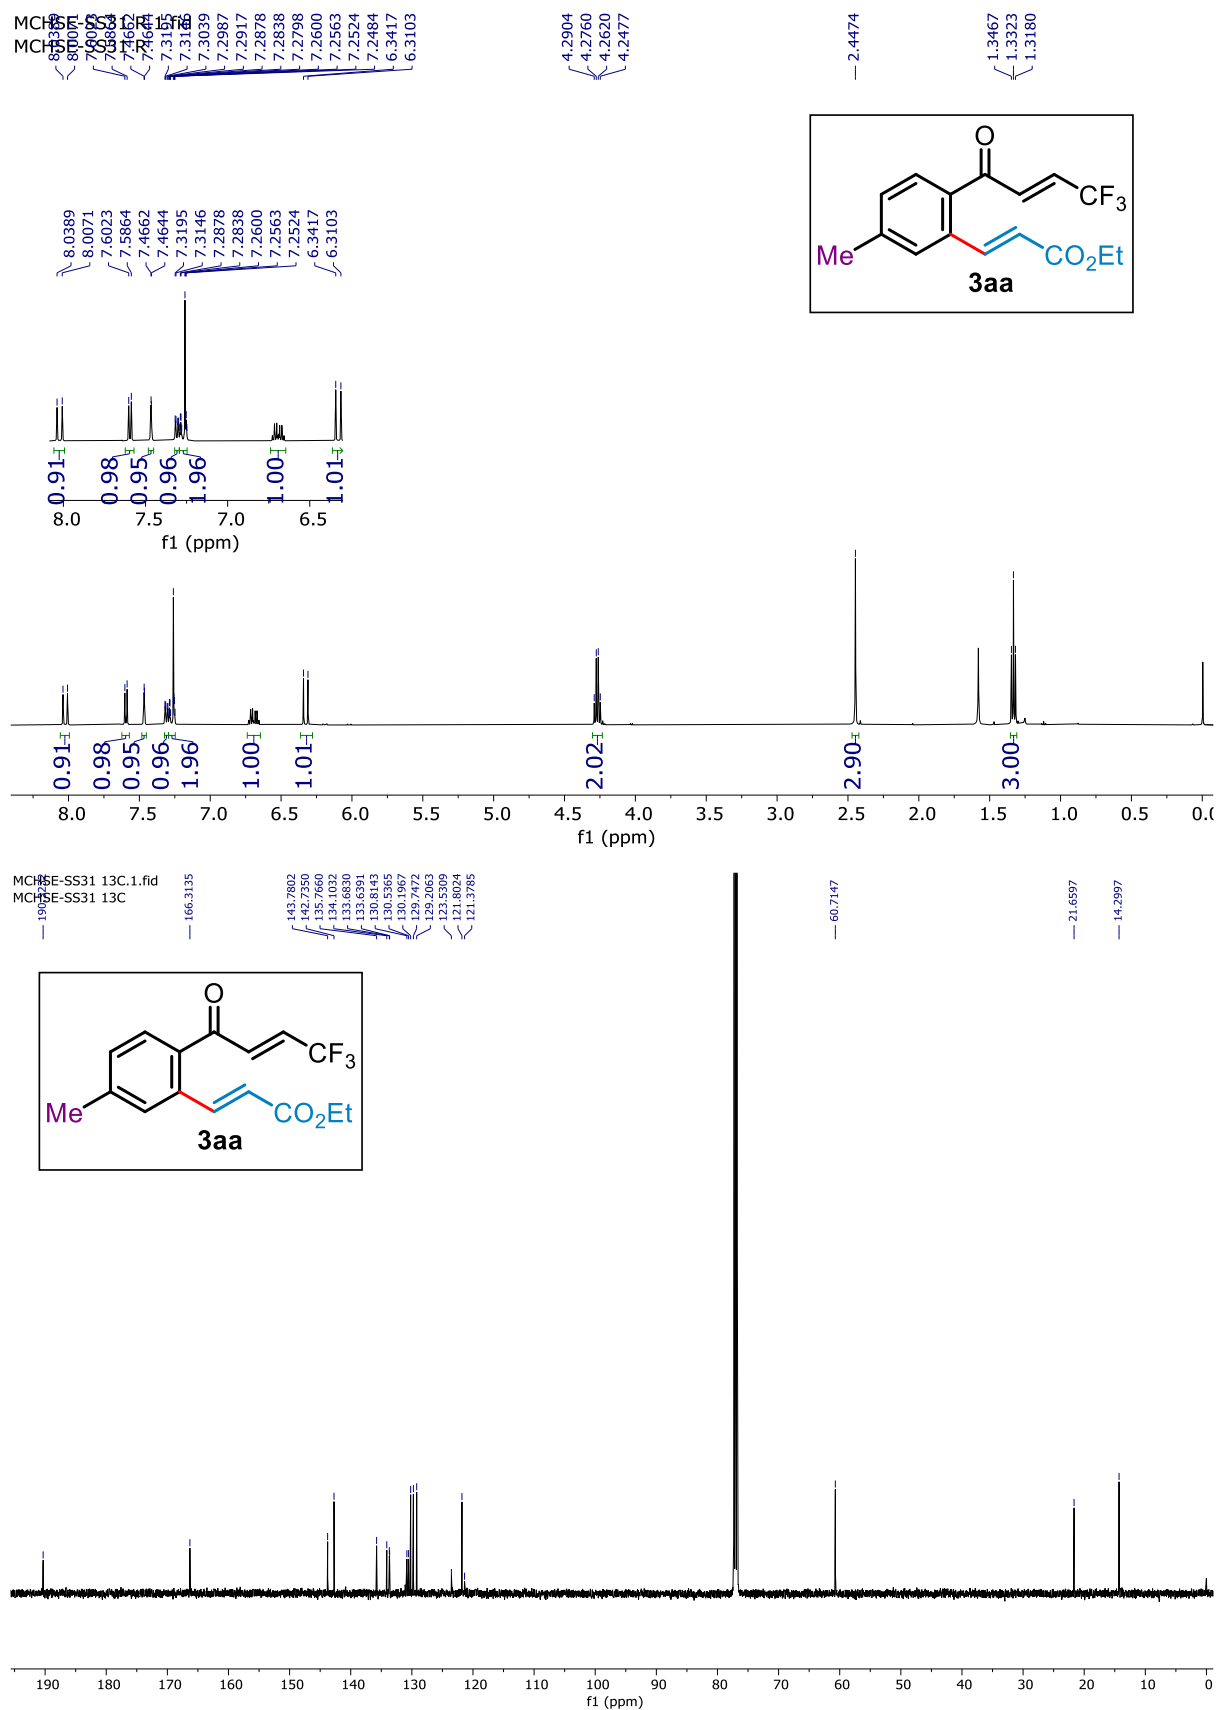

MCHSE-SS31 19F.3.fid  
MCHSE-SS31 19F

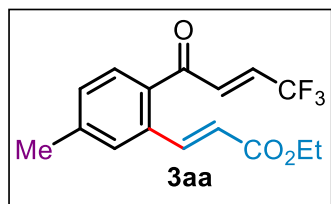

-65.0940

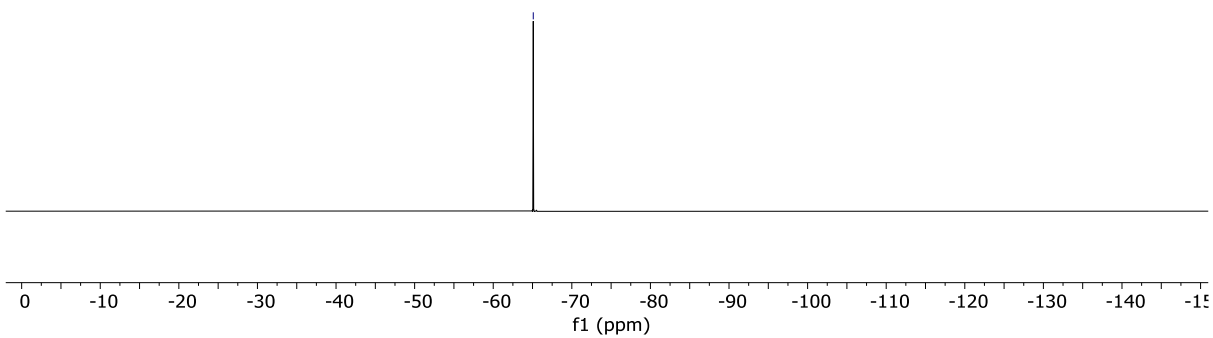

MCHSE-S900248.fid  
MCHSE-S900248.fid

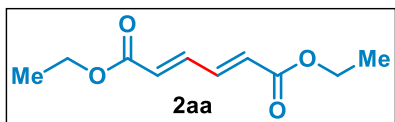

6.2095  
6.2034  
6.1867  
6.1803

4.2625  
4.2485  
4.2342  
4.2198

1.3313  
1.3170  
1.3027

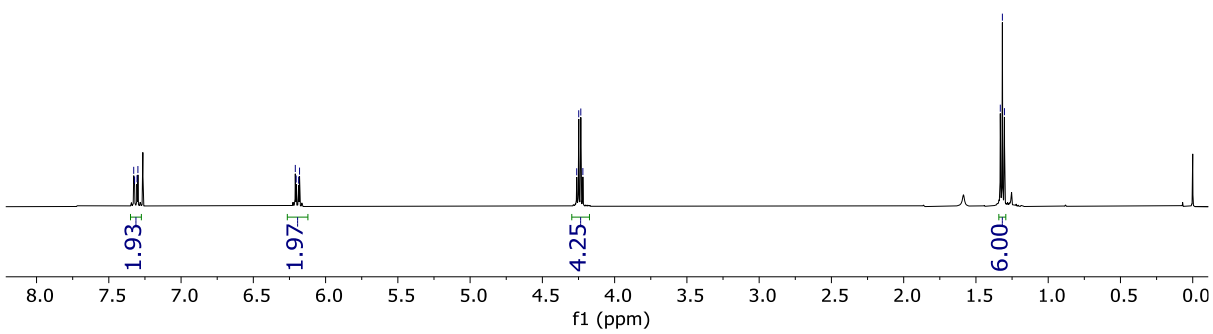

MCHSE-SS90044 13C.1.fid  
MCHSE-SS90044

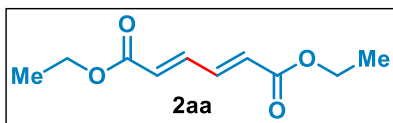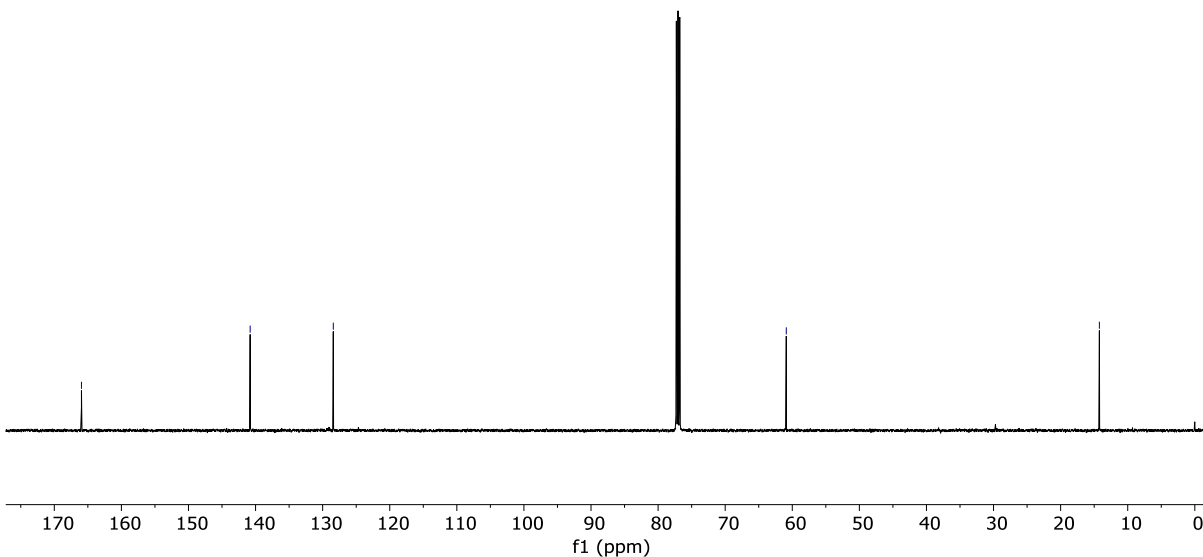

MCHSE-SS64-1  
MCHSE-SS64-1

7.7312  
7.7304  
7.7296  
7.4489  
7.4460  
7.4148  
7.4109  
7.3980  
7.3950  
7.3853  
7.3833  
7.2583  
7.2544  
7.2348  
7.2309  
7.2269  
7.2229  
7.2189  
6.7214  
6.7080  
6.7028  
6.6949  
6.6887  
6.6765  
6.6643  
6.6521  
6.6344

4.2524  
4.2516  
4.2640  
4.2564

2.4573

1.3570  
1.3377  
1.3233

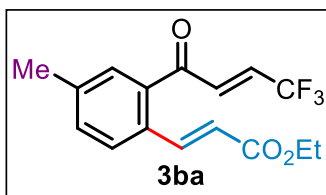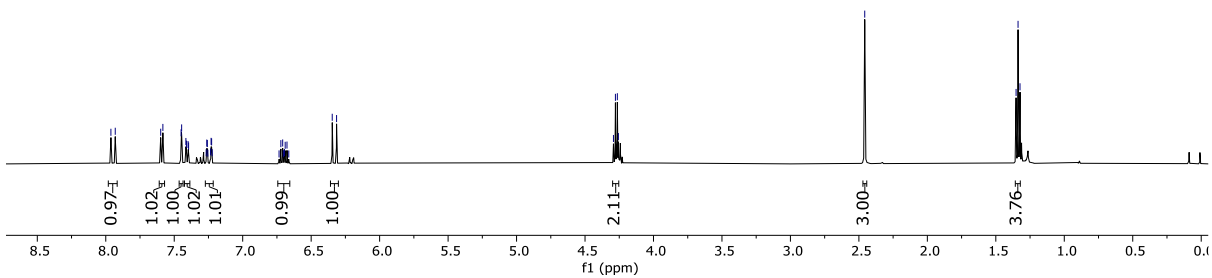

MCHSE-SS64-13C.1.fid  
MCHSE-SS64-13C

191.333  
166.357  
141.9713  
140.7982  
140.1367  
137.0195  
133.4308  
132.3016  
131.3624  
131.0810  
130.7996  
130.5182  
129.7435  
128.4023  
128.2086  
125.6286  
123.4761  
121.3273  
121.1848  
119.1749

60.6636

21.2833

14.2741

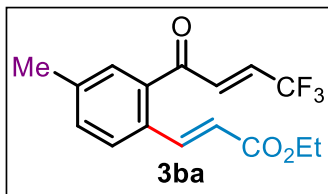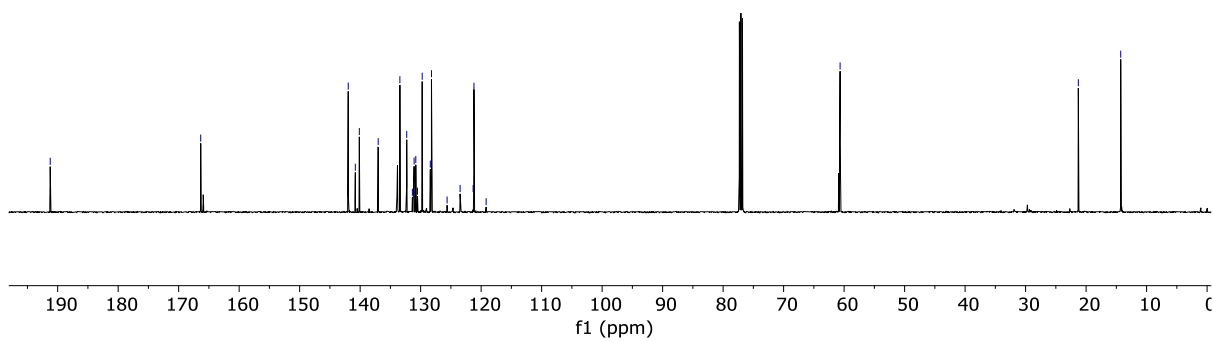

MCHSE-SS64-19F.1.fid  
MCHSE-SS64-19F

-65.1217

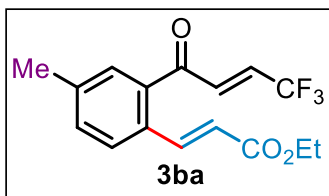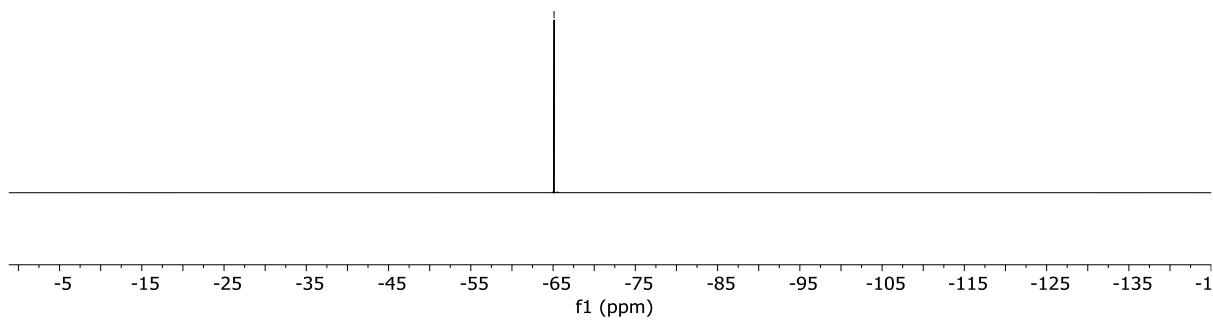



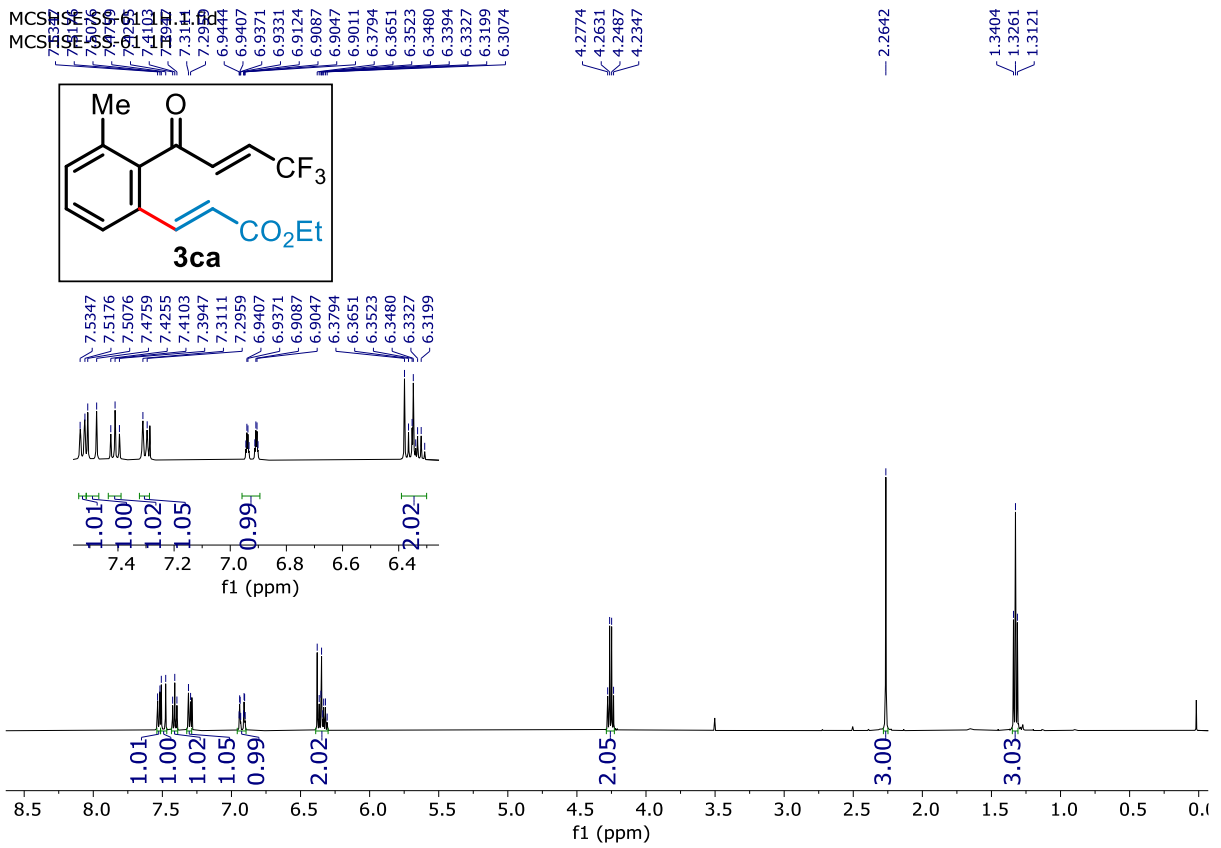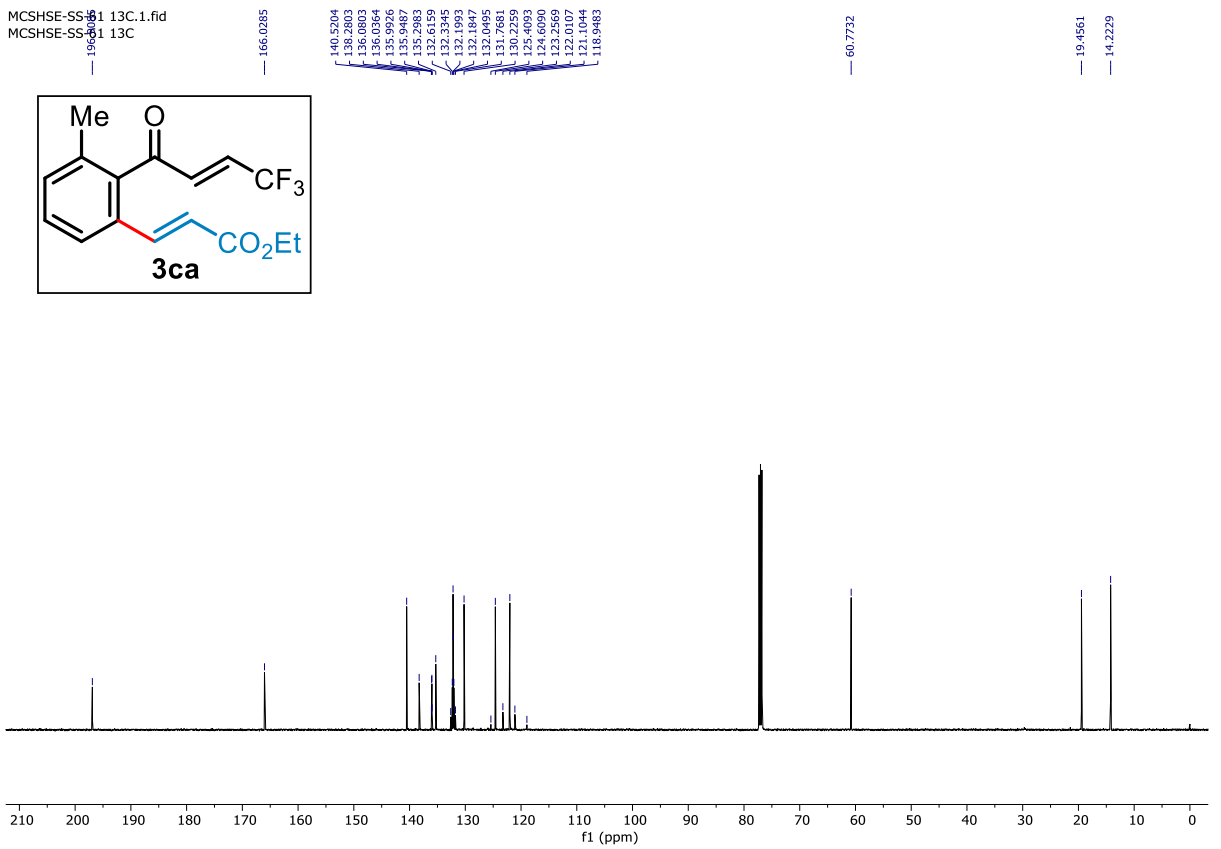

MCSHSE-SS-61 19F.1.fid  
MCSHSE-SS-61 19F

— 65.2838

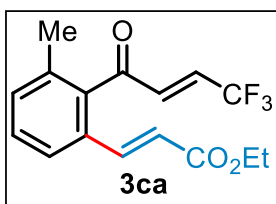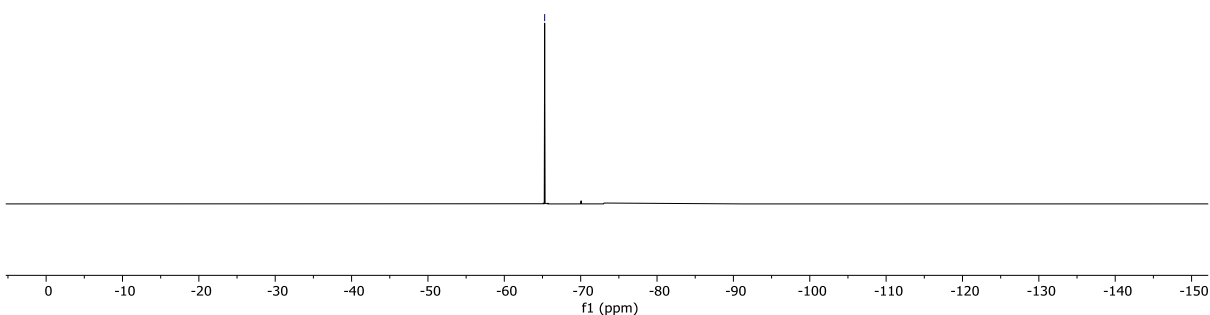

7.372  
7.033  
7.066  
7.050  
7.035  
7.022  
7.009  
7.001  
7.000  
6.996  
6.990  
6.988  
6.531  
6.518  
6.504  
6.499  
6.491  
6.486  
6.473  
6.460  
6.384  
6.352  
4.2620  
4.2477  
4.2333  
4.2193  
— 3.8489  
1.3262  
1.3119  
1.2975

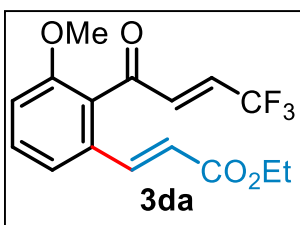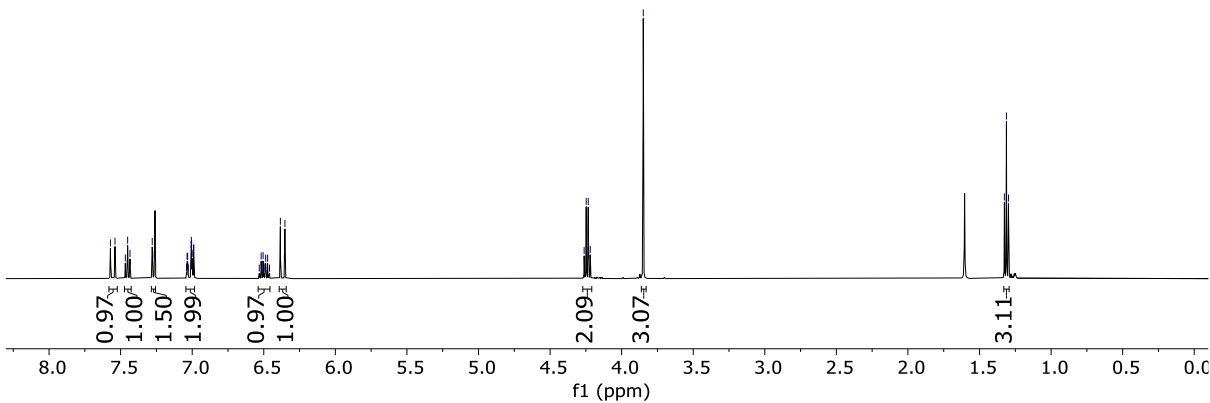

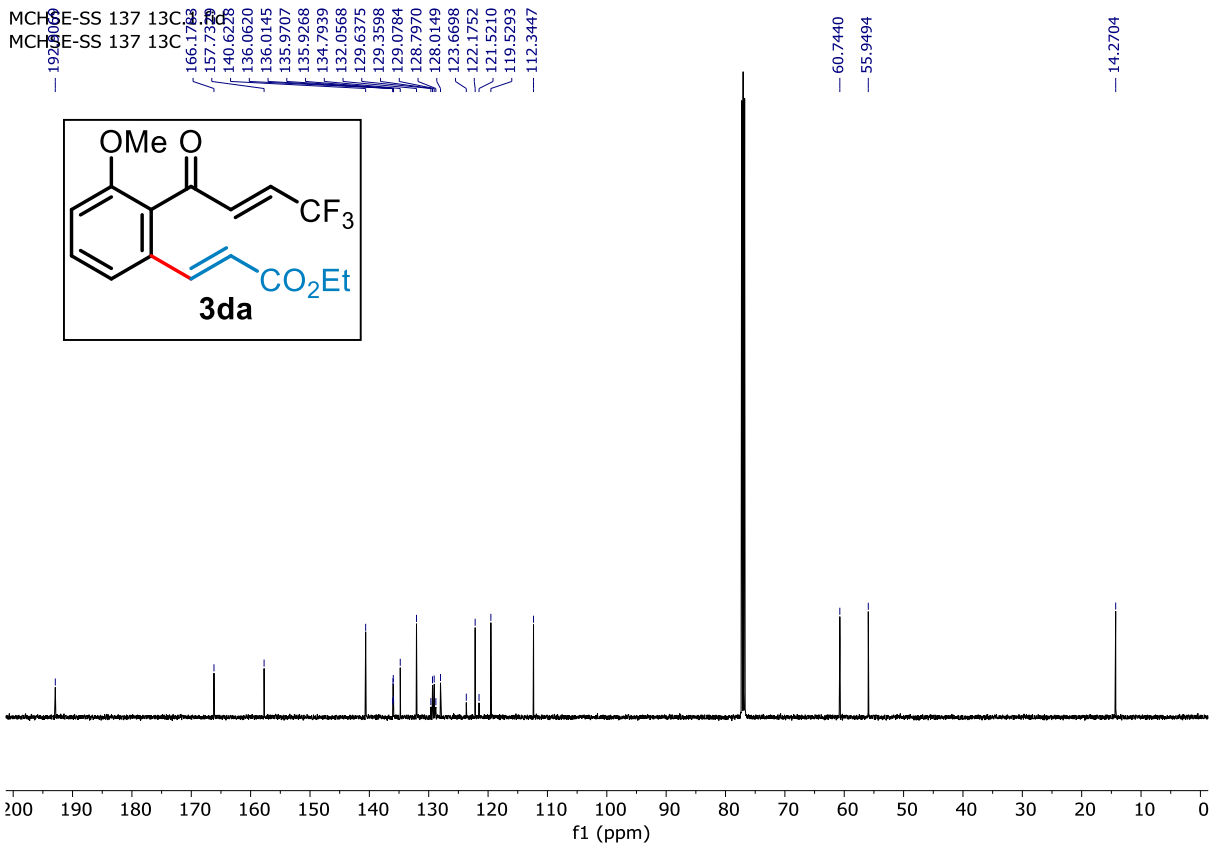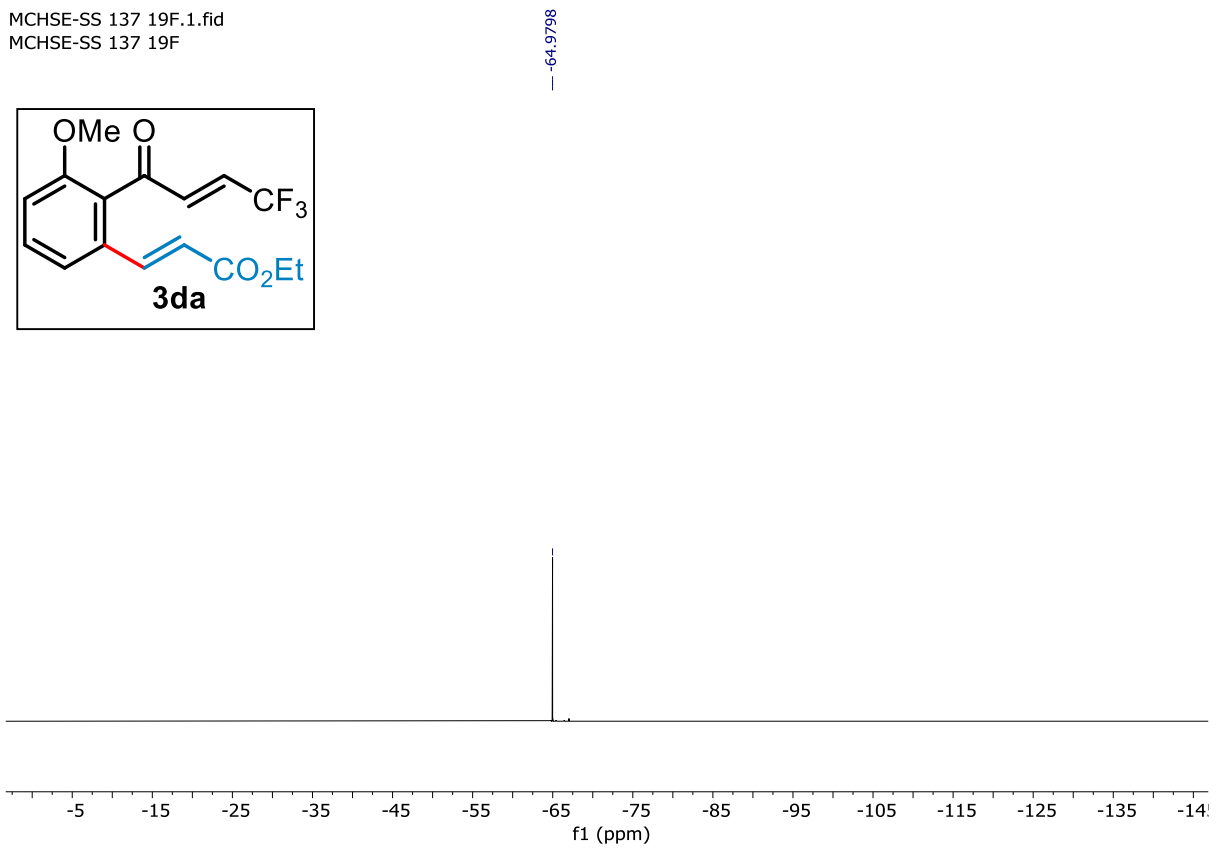

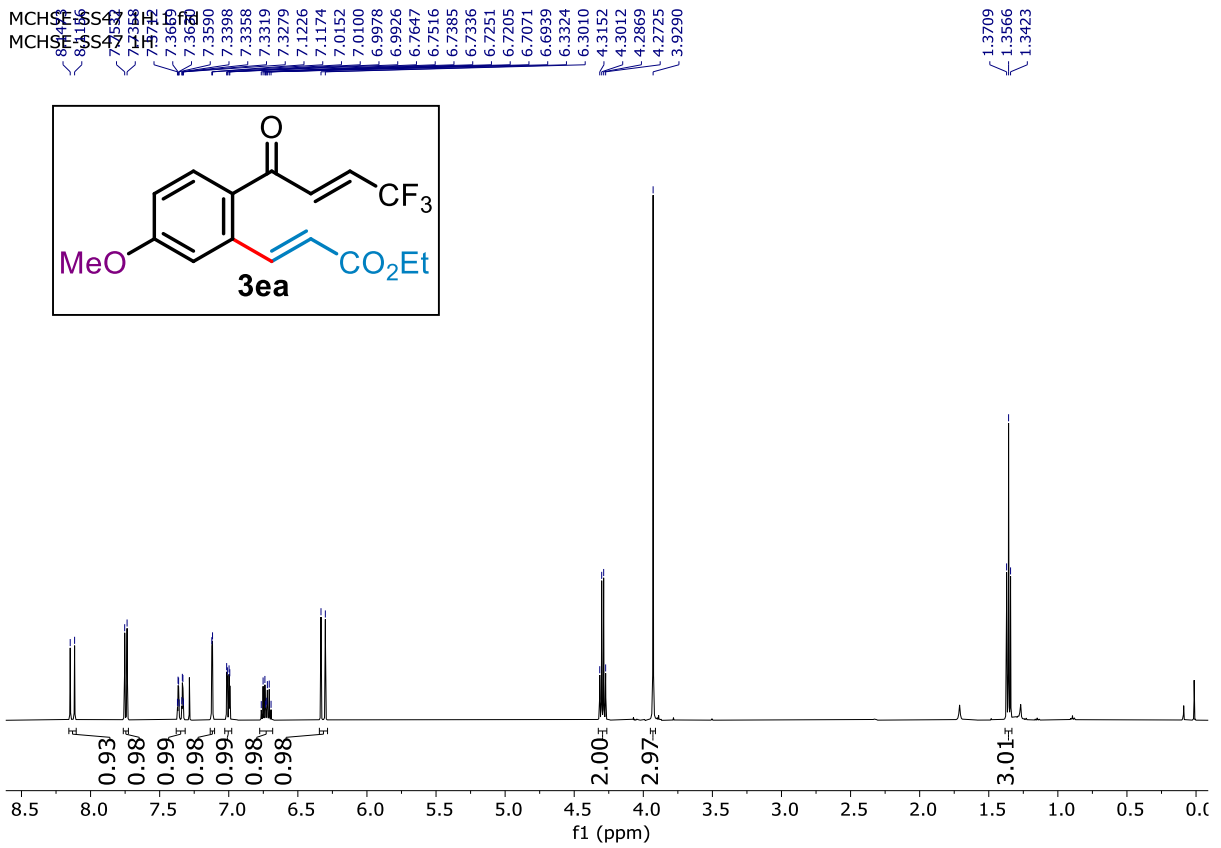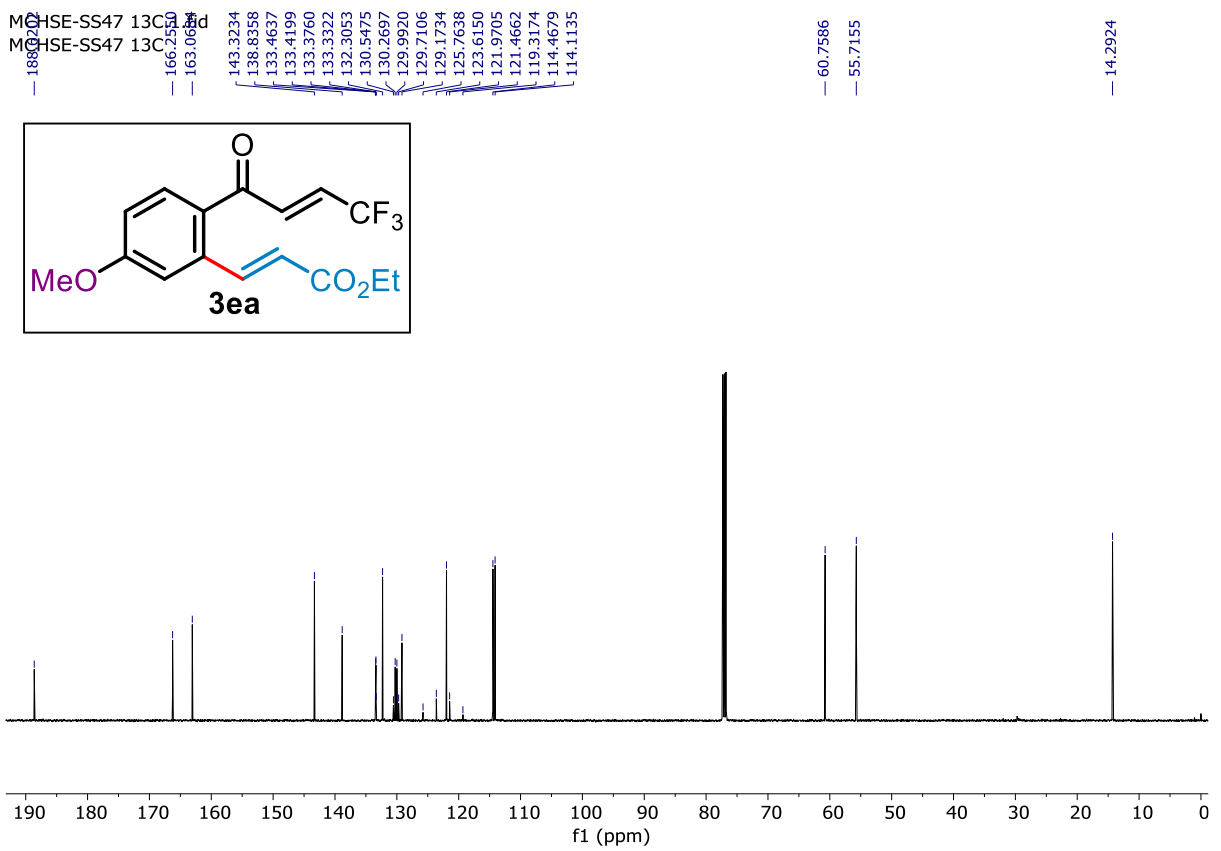

MCHSE-SS47 19F.1.fid  
MCHSE-SS47 19F

-65.0295

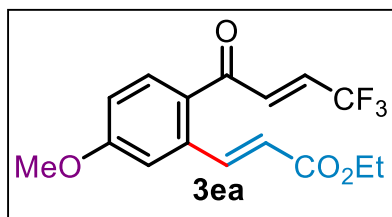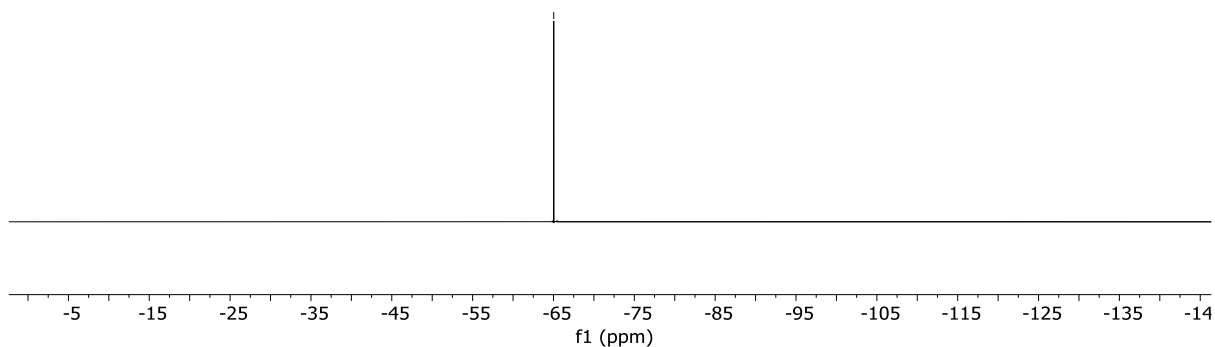

MCHSE-SS47 19F.1.fid  
MCHSE-SS47 19F

4.2730  
4.2586  
4.2443  
4.2303  
-3.9063

1.3287  
1.3143  
1.3000

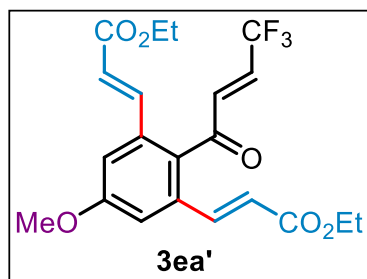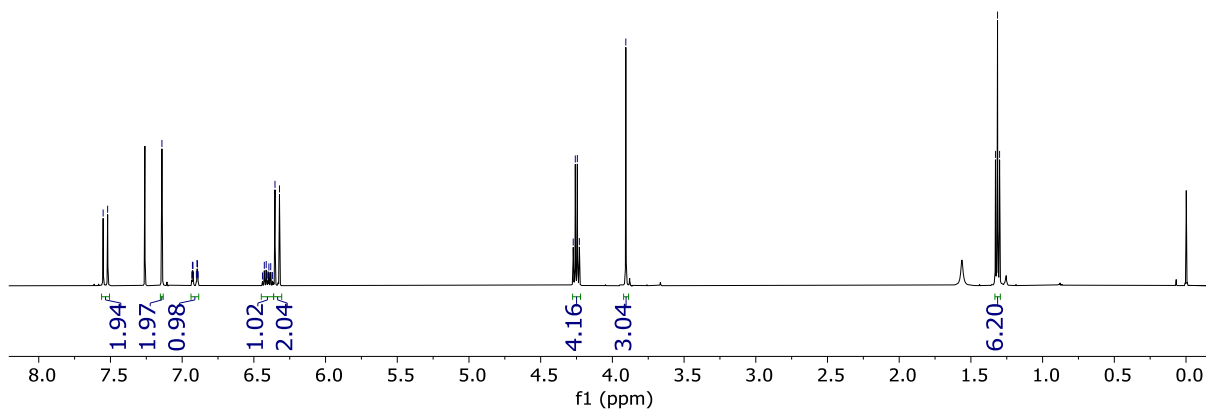

MCHSE-SS-45 13C.1.fid  
MCHSE-SS-45 13C

194.6184

165.6740

161.0228

140.3633

136.2557

136.2119

135.5541

131.7754

131.4940

131.2528

123.2459

123.1984

121.0898

113.7553

60.9267

55.6935

14.1974

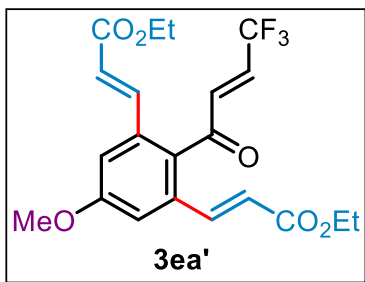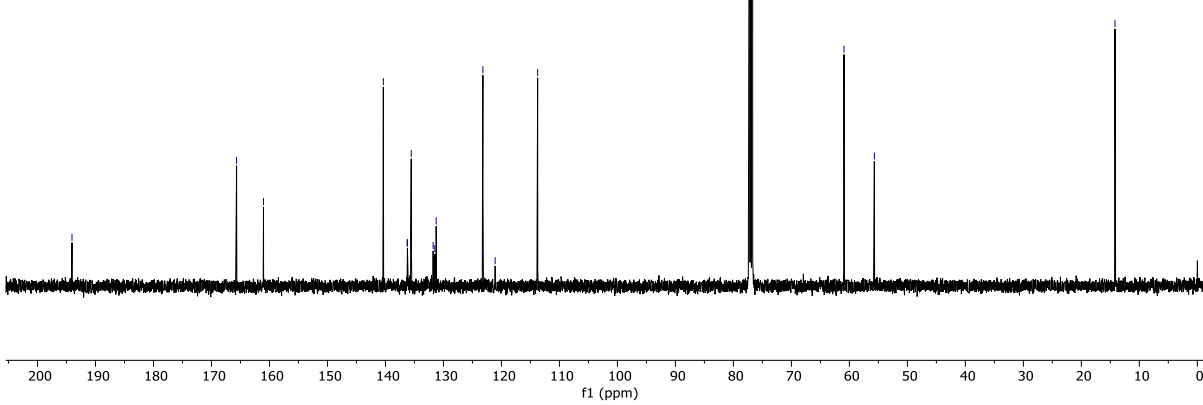

MCHSE-SS-45 19F.1.fid  
MCHSE-SS-45 19F

-65.2653

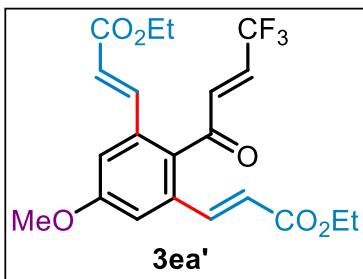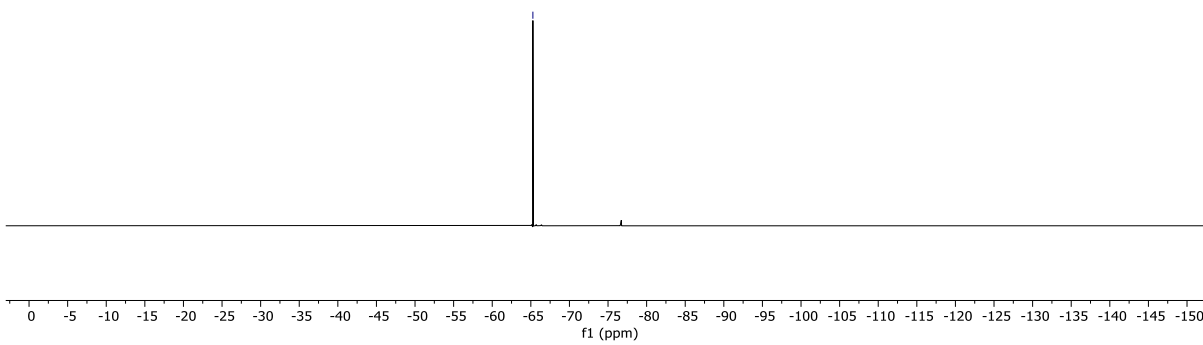

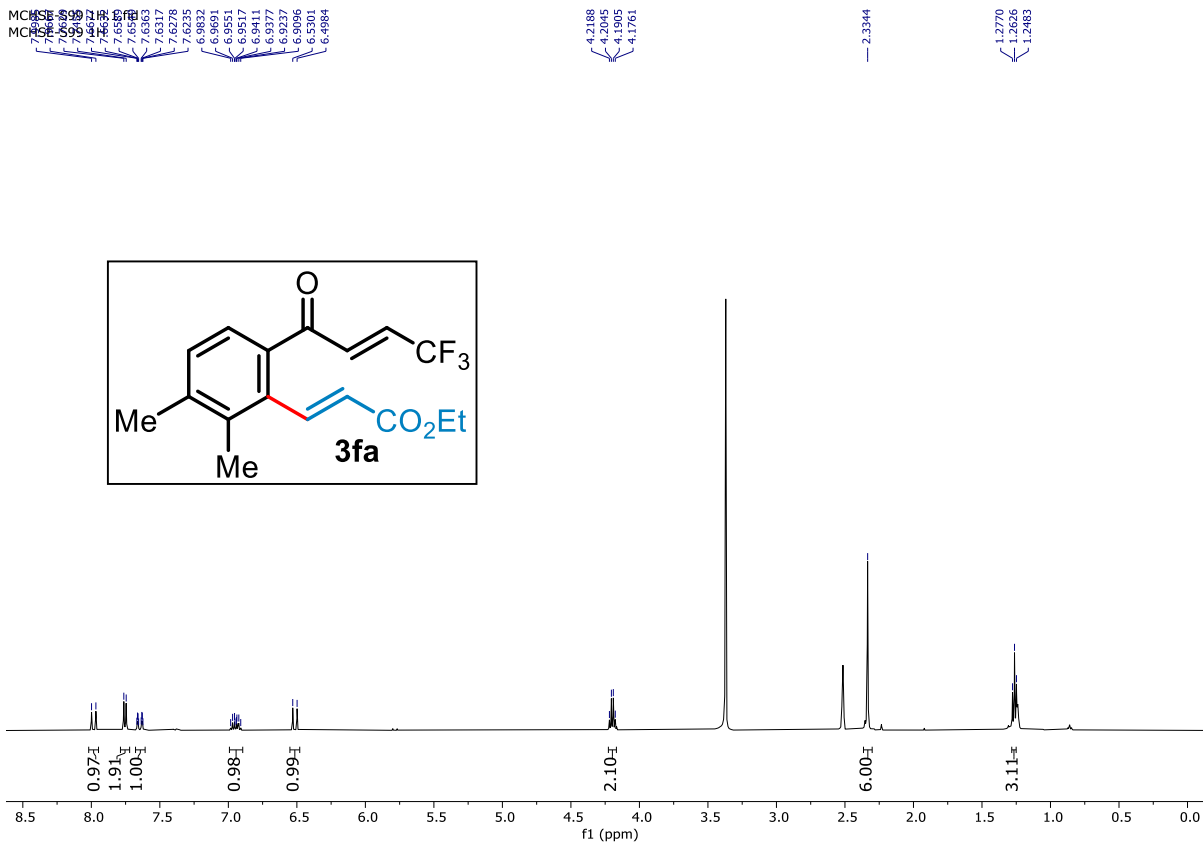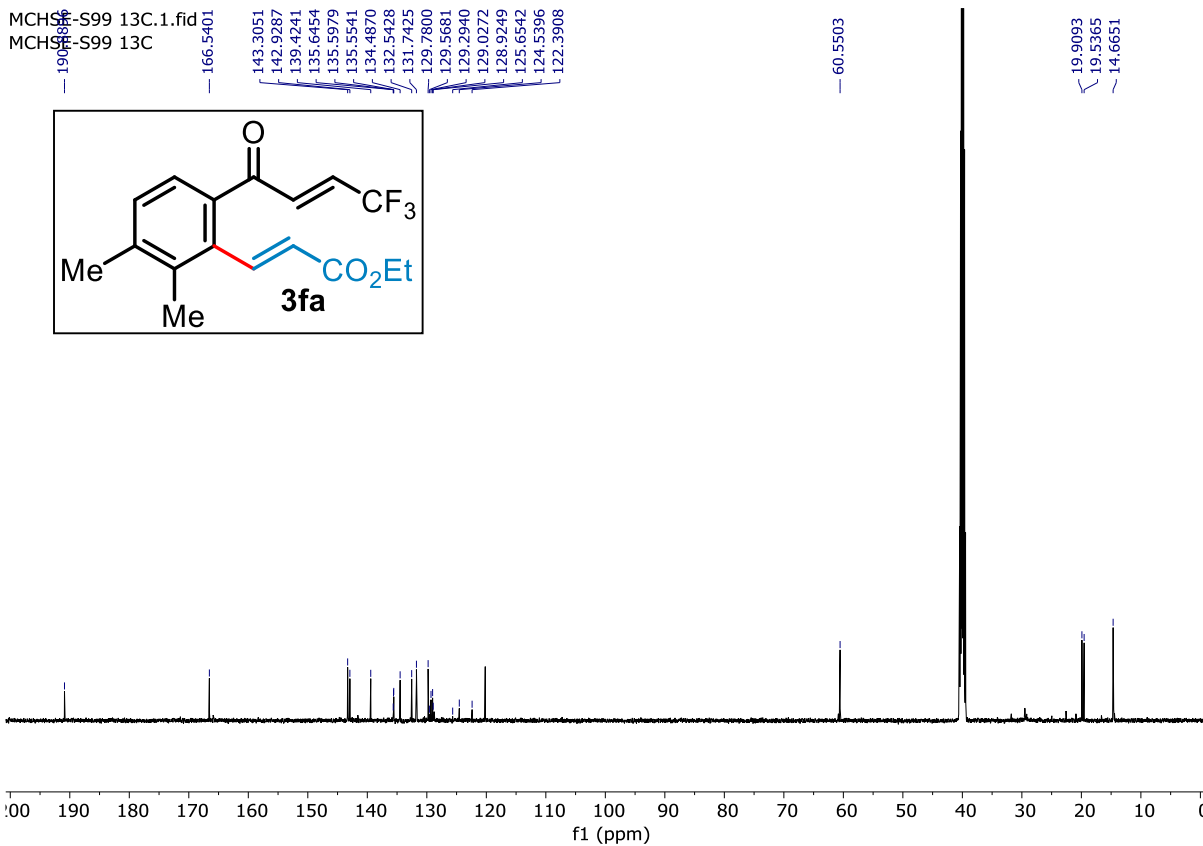

MCHSE-S99 19F.1.fid  
MCHSE-S99 19F

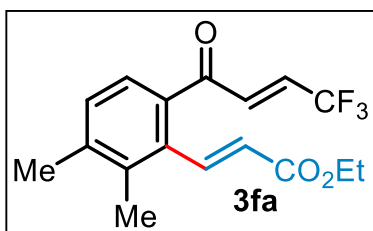

-63.3163

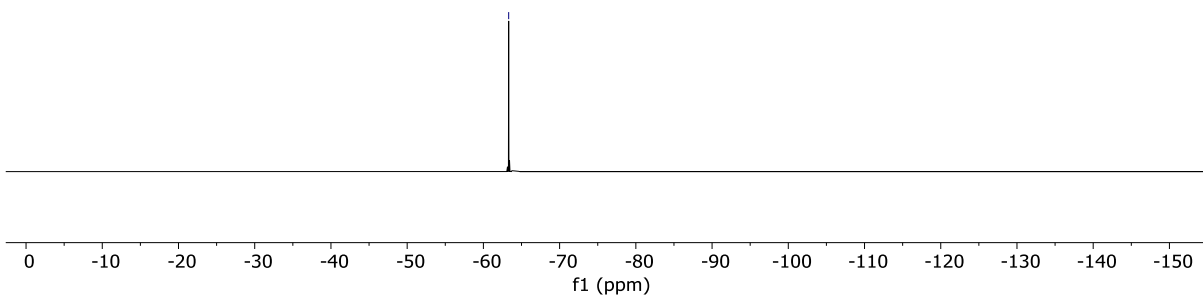

MCHSE-S87017.1.fid  
MCHSE-S87017

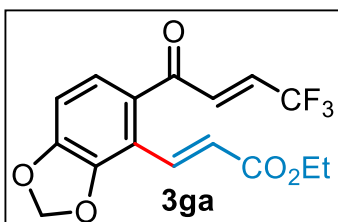

7.9284  
7.8961  
7.3134  
7.2969  
7.2709  
7.2630  
7.2438  
7.2395  
7.2319  
6.8890  
6.8672  
6.7368  
6.7303  
6.7236  
6.7102  
6.7053  
6.6971  
6.6922  
6.6791  
6.6709  
6.1748

4.2093  
4.2760  
4.2617  
4.2476

1.3169  
1.3329  
1.3186

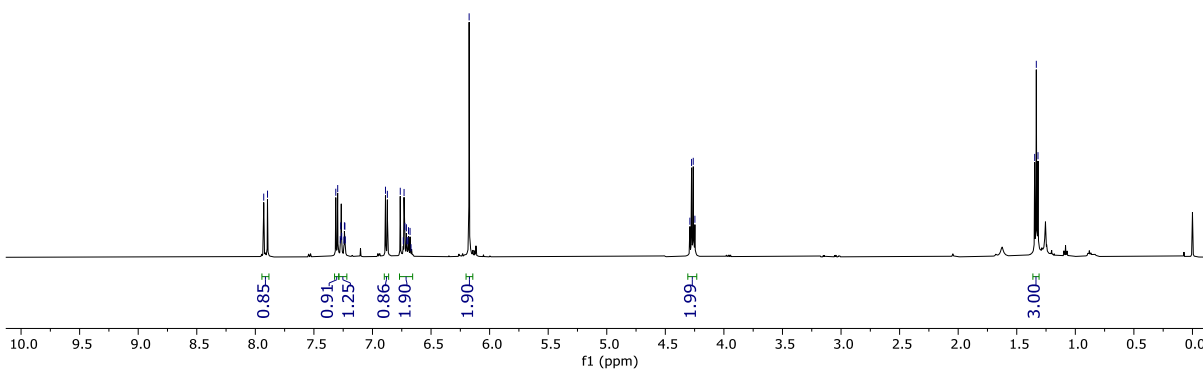



MCHSE-S87017 13C.1.fid  
MCHSE-S87017

186.7017  
166.7959  
151.4582  
147.9353  
136.3507  
133.9242  
133.8767  
131.3113  
130.8398  
130.5584  
129.9993  
129.9993  
126.0306  
124.7735  
123.5565  
121.4077  
117.5815  
108.0544  
102.4631  
60.6563  
14.2887

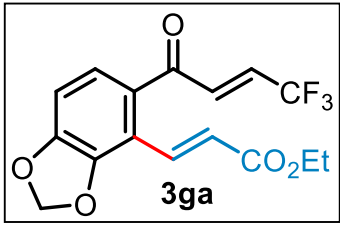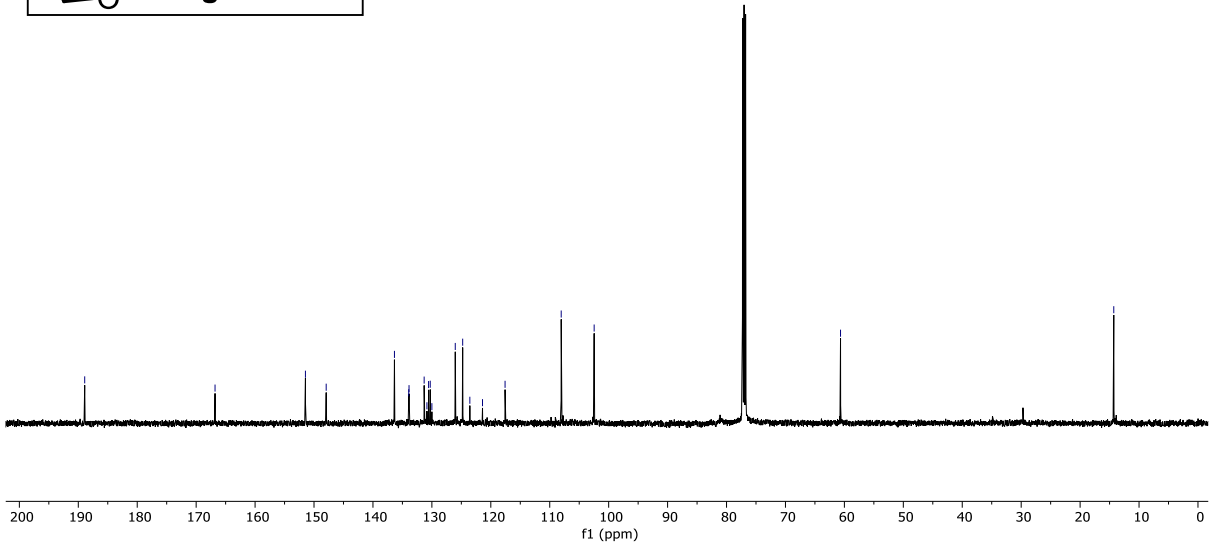

MCHSE-SS129 19F.1.fid  
MCHSE-SS129 19F

-65.0240

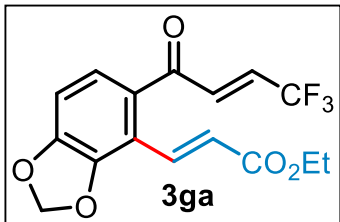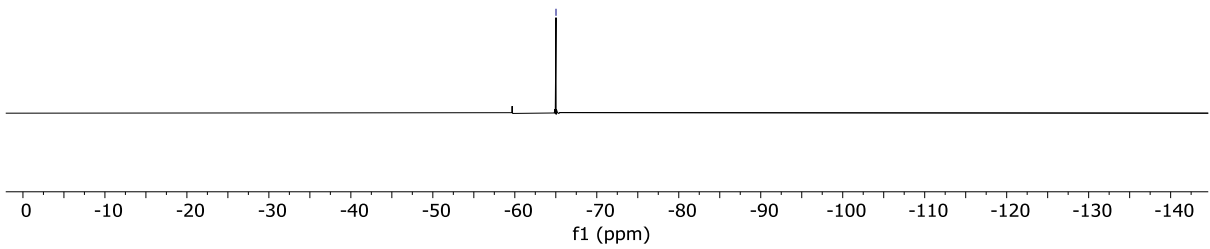

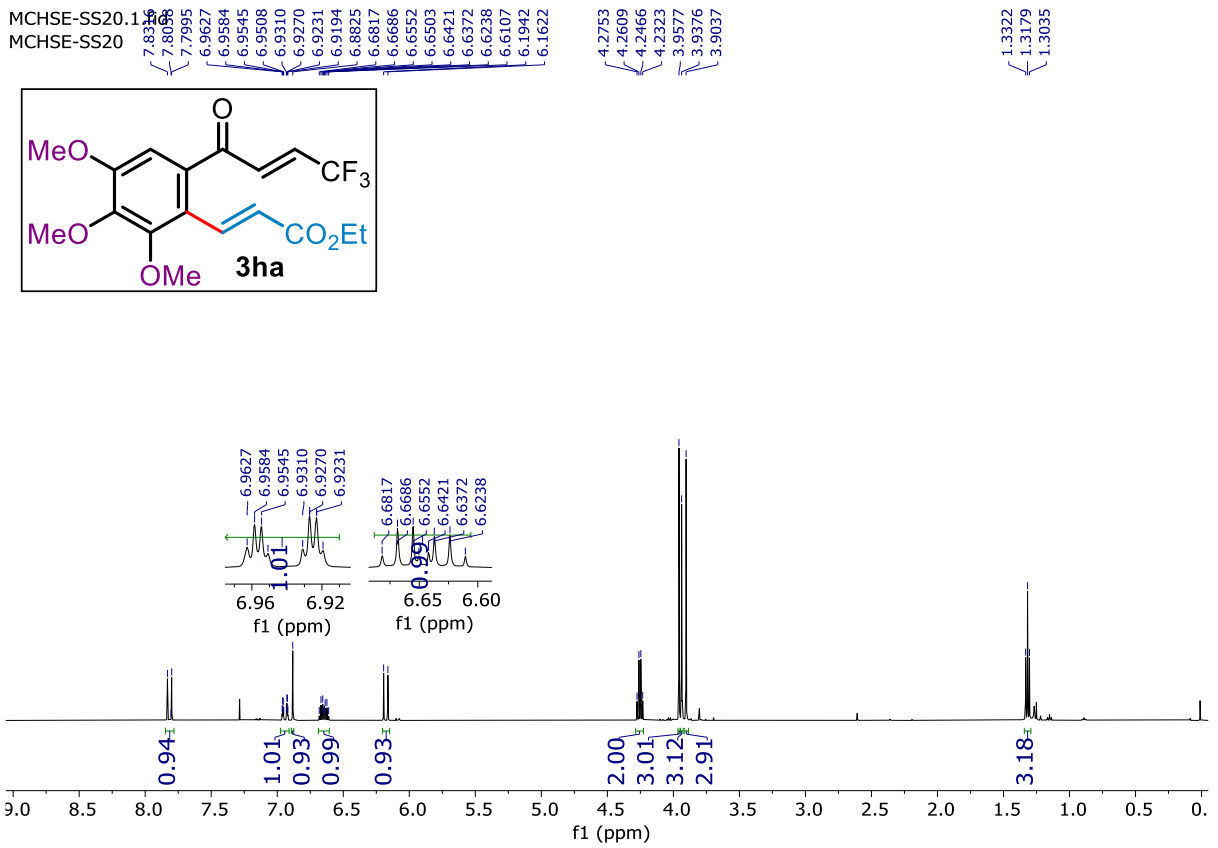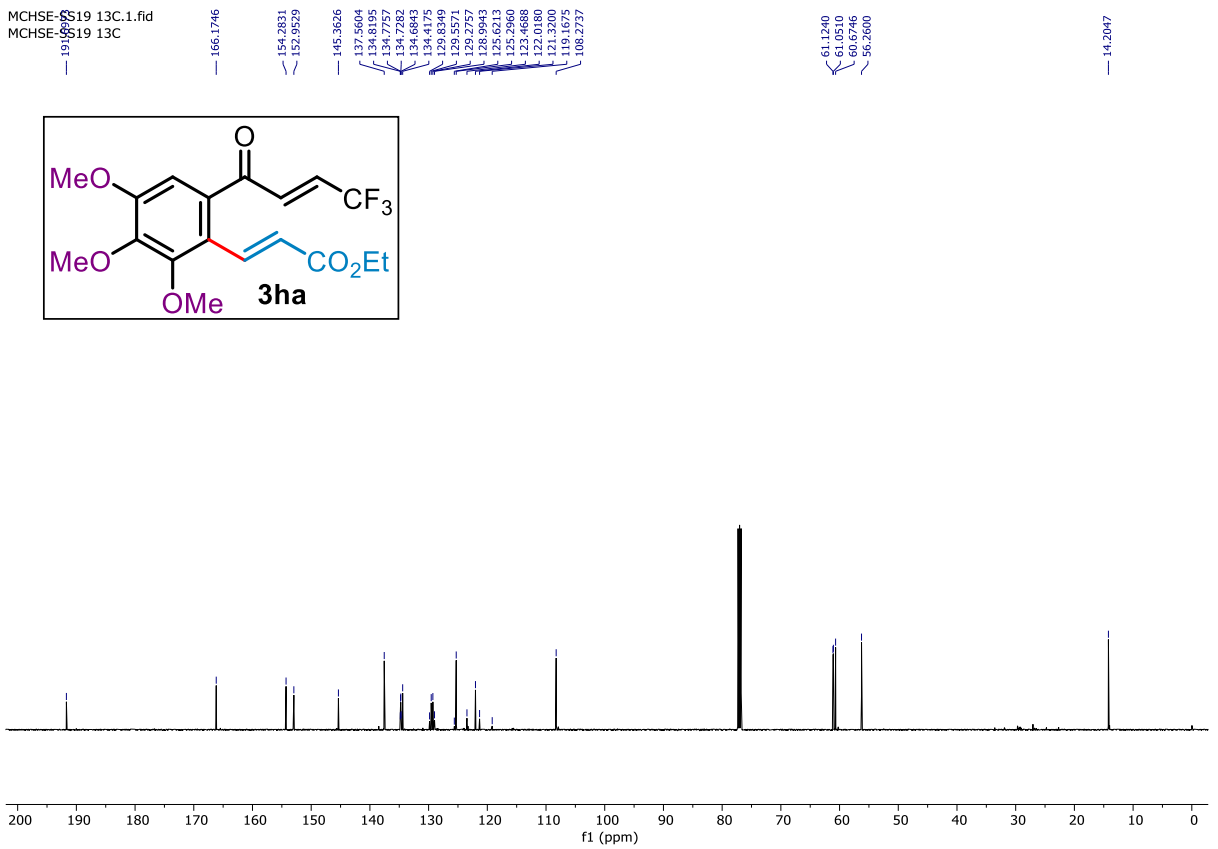

MCHSE-SS19 19F,1.fid  
MCHSE-SS19 19F

— 65.0535

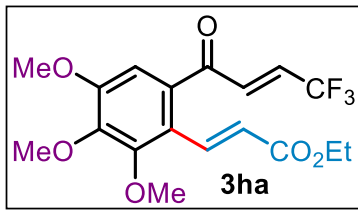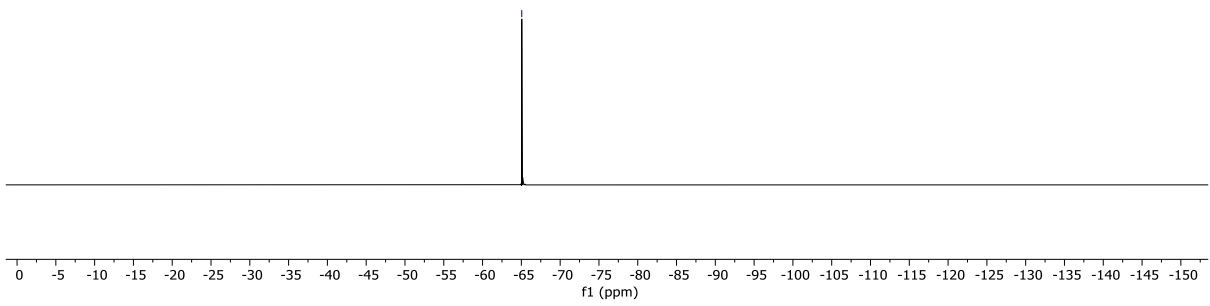

MCHSE-SS19 1H,1.fid  
MCHSE-SS19 1H

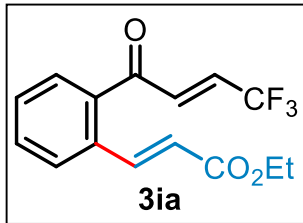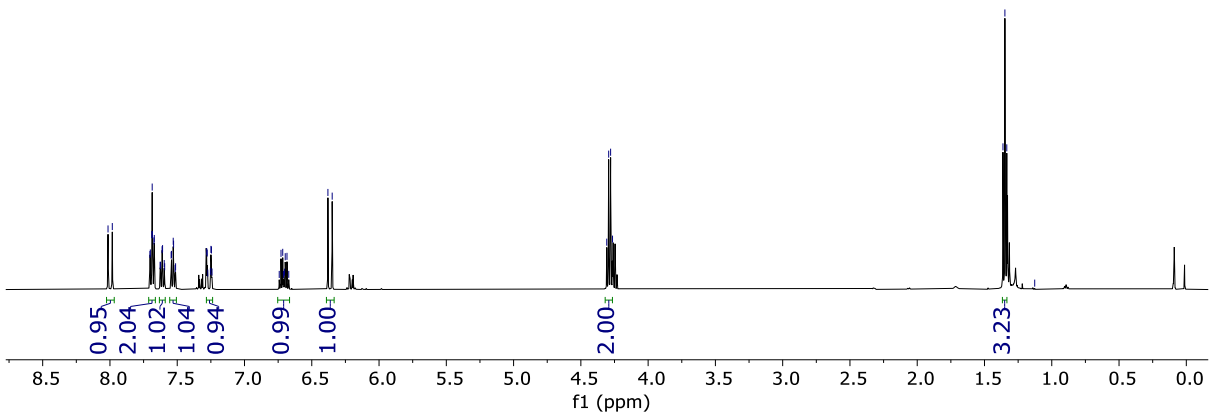

MCHSE-SS25 13C.1.fid  
MCHSE-SS25 13C

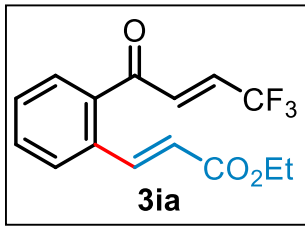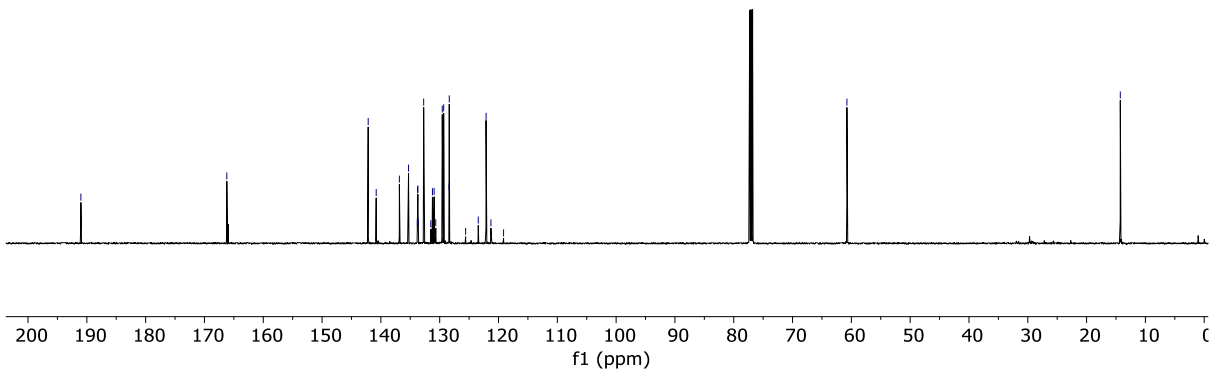

MCHSE-SS25 19F.1.fid  
MCHSE-SS25 19F

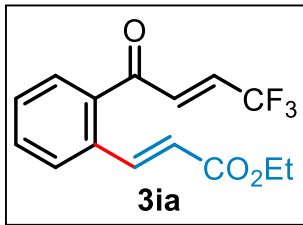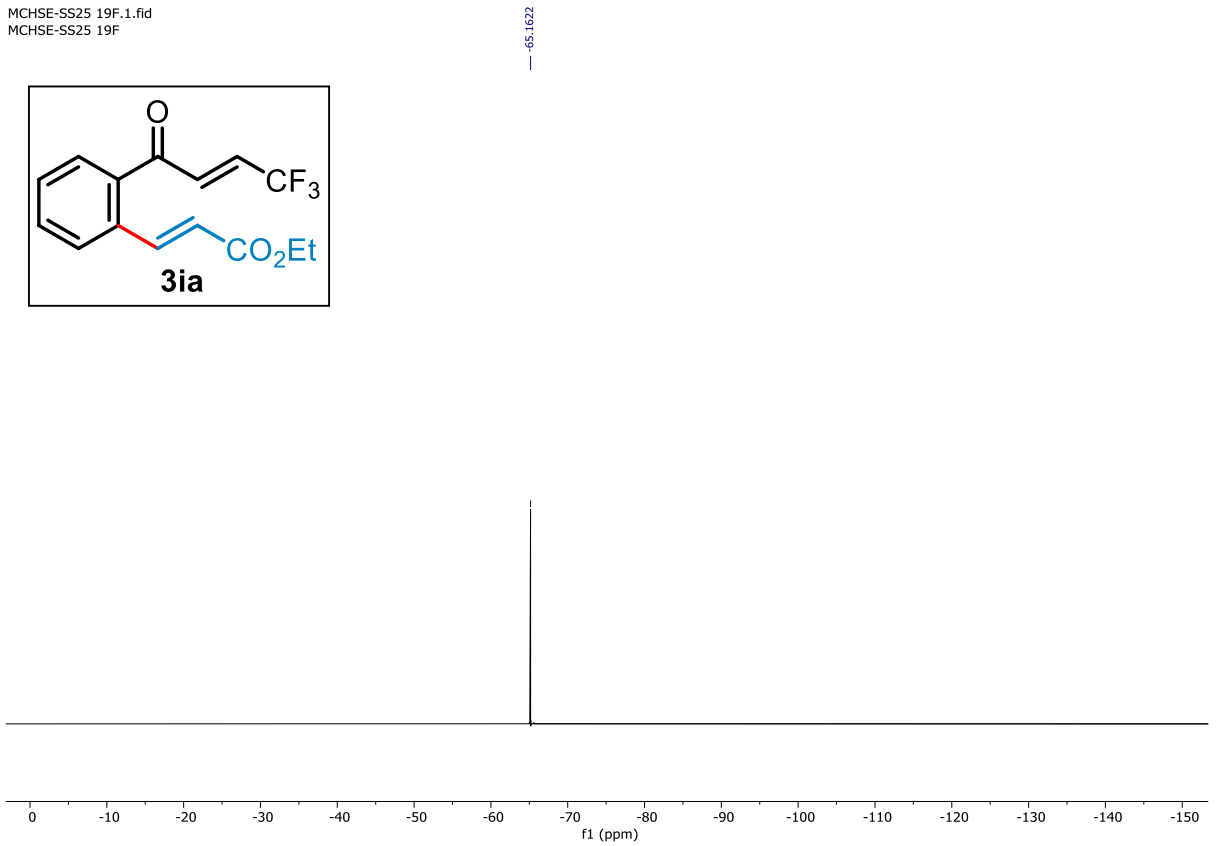

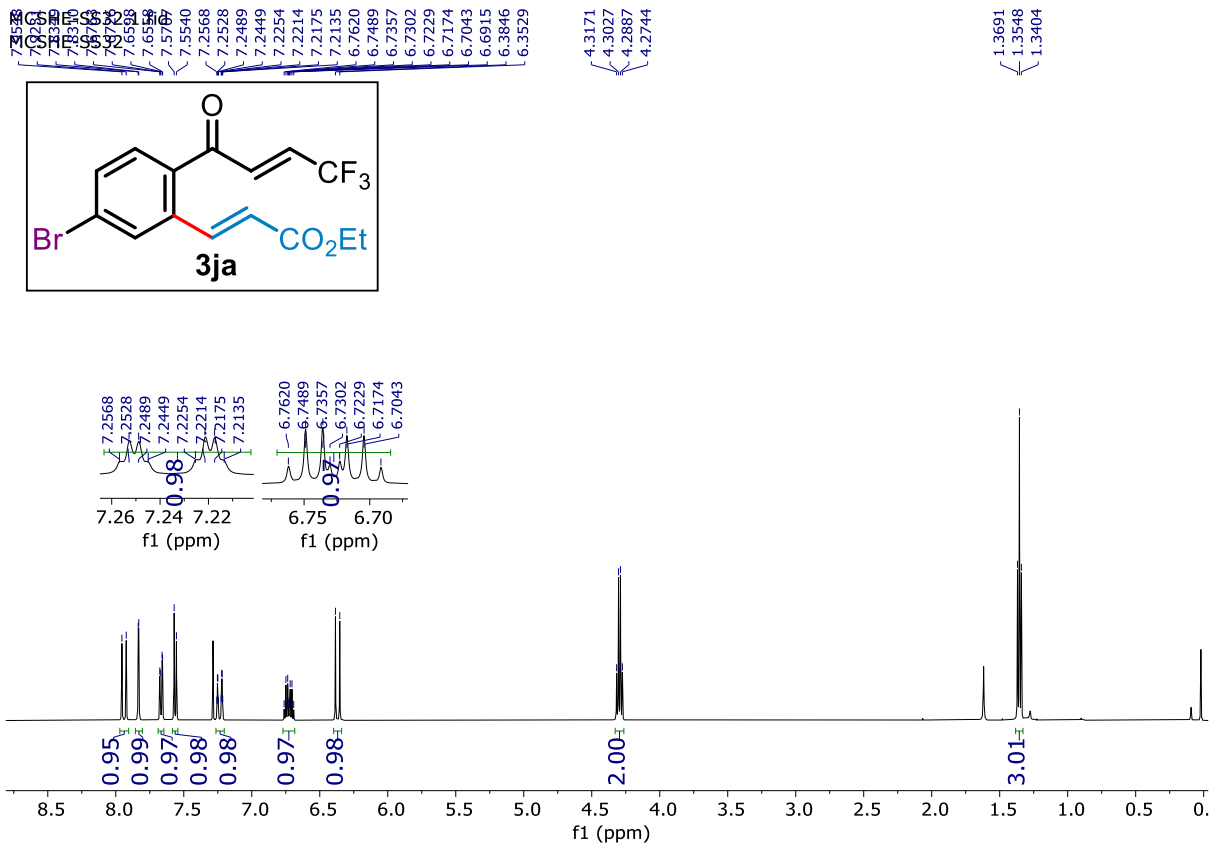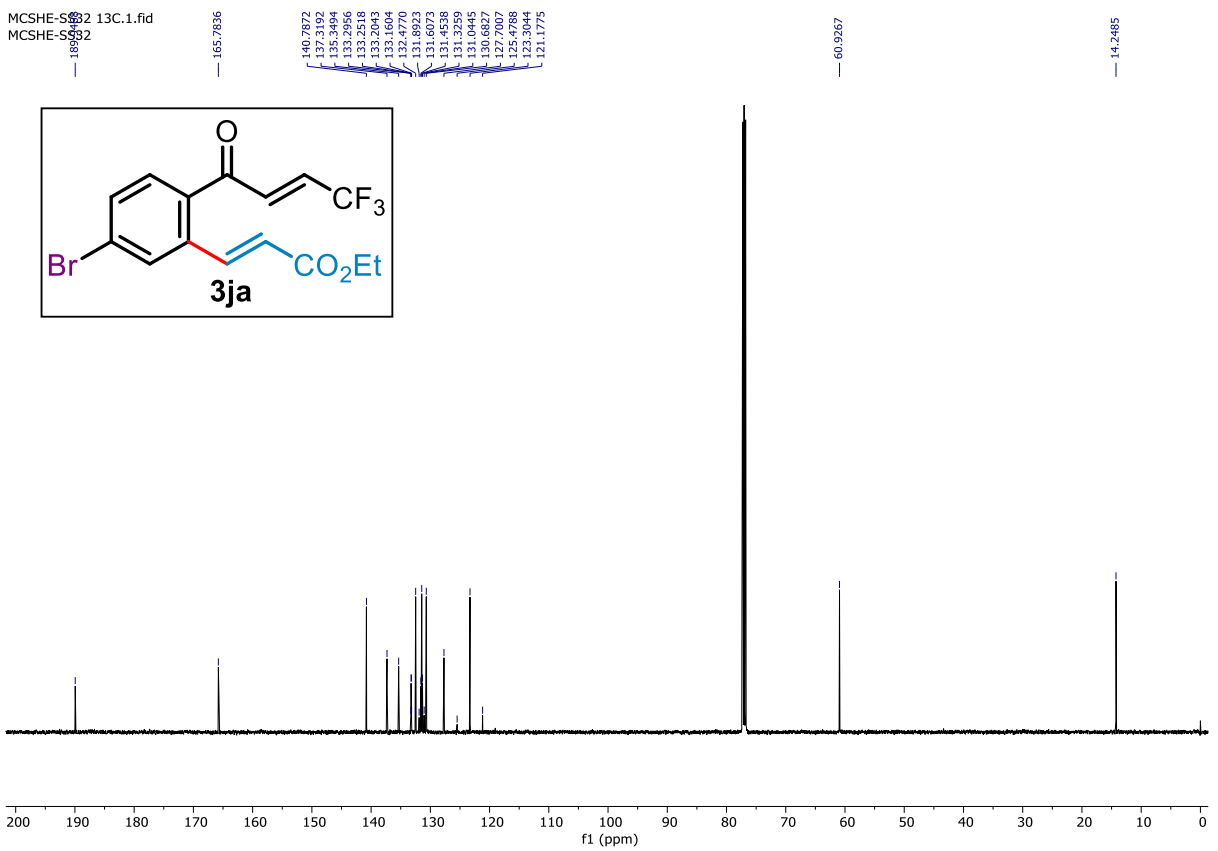

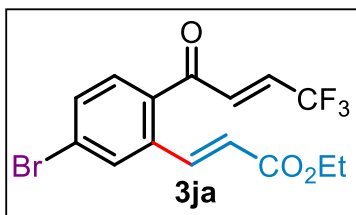

-65.1898

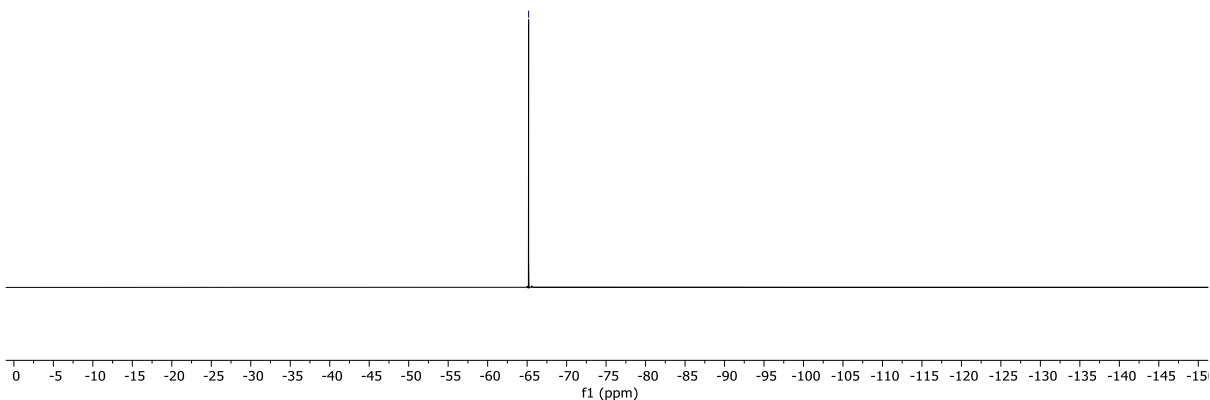

MCHSE  
MCHSE  
7.8483  
7.8165  
7.7473  
7.7339  
7.7115  
7.6151  
7.4881  
7.4684  
7.4726  
7.2432  
7.2393  
7.2353  
7.2316  
7.2118  
7.2078  
7.2042  
7.2002  
6.7408  
6.7276  
6.7148  
6.7093  
6.7017  
6.6962  
6.6834  
6.6703  
6.3625  
6.3310  
4.2931  
4.2791  
4.2647  
4.2504

1.3448  
1.3305  
1.3162

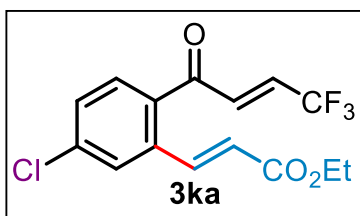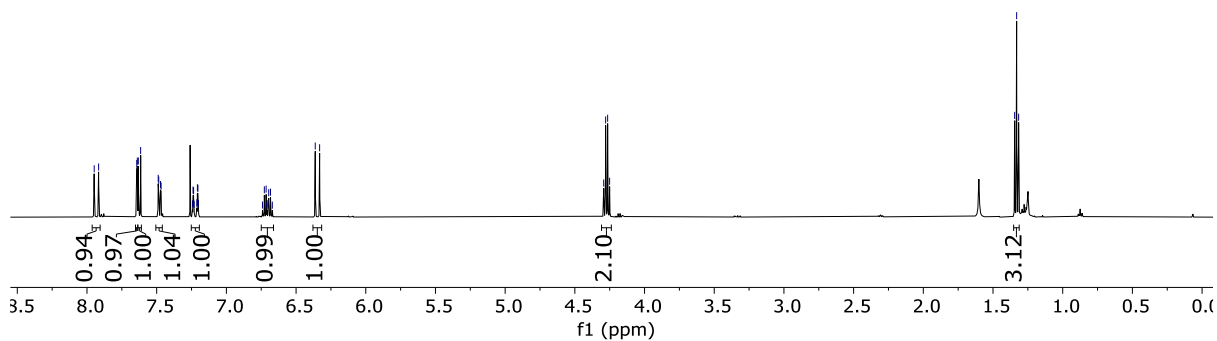

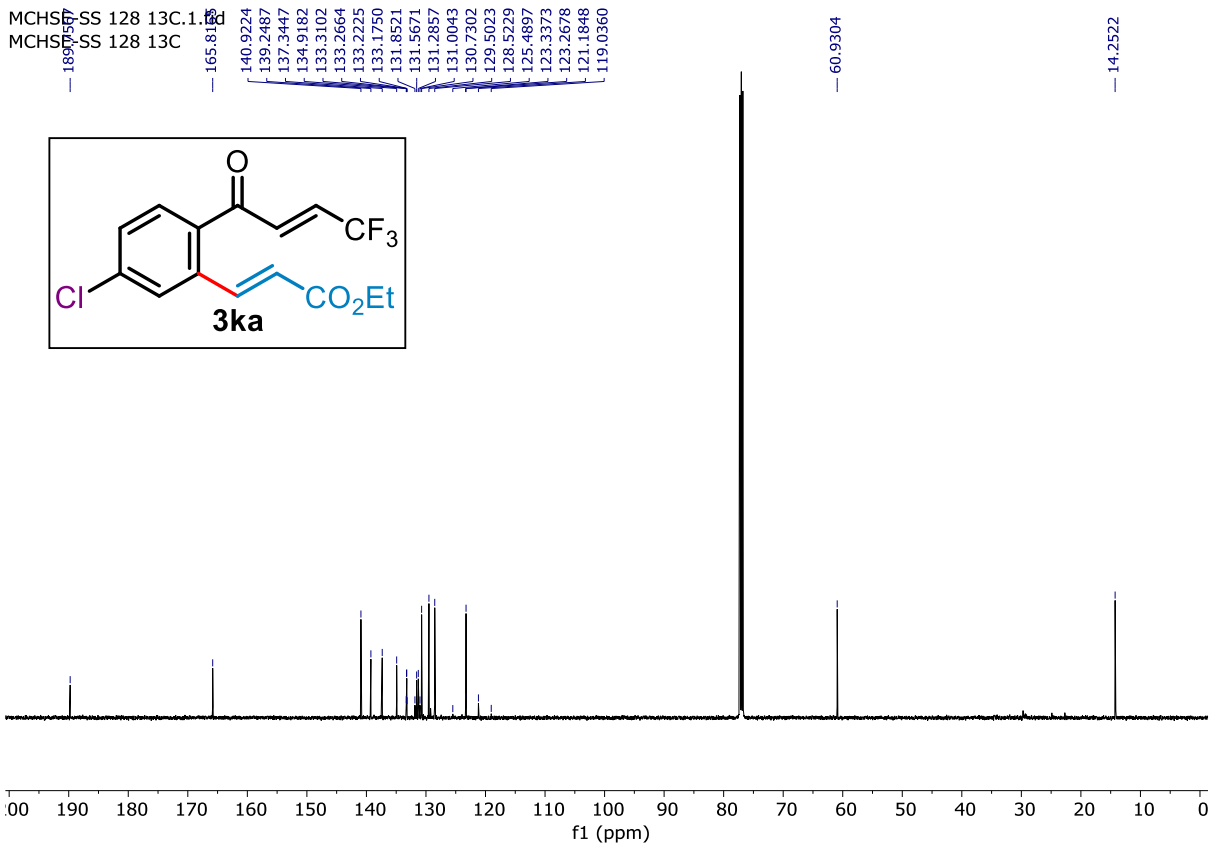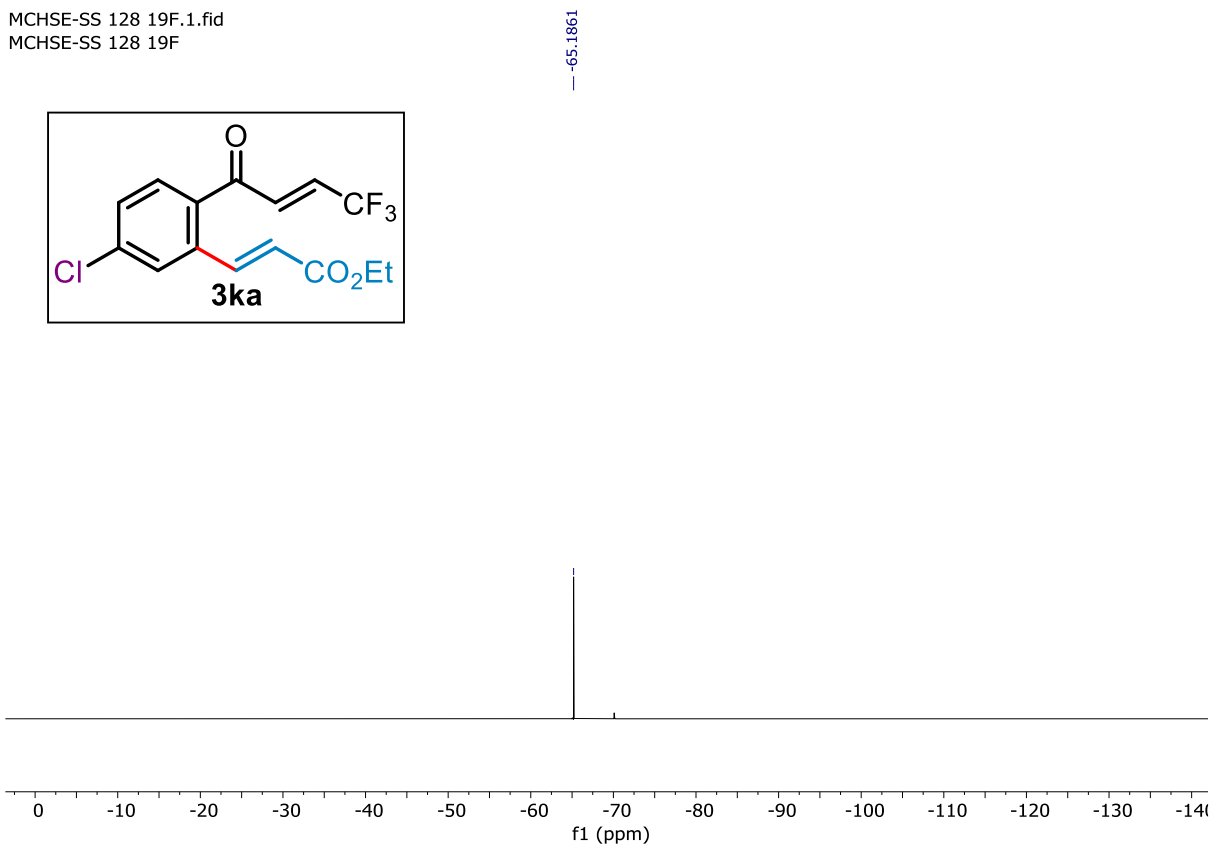

MCSHE-S034 13C.1.fid  
MCSHE-S034

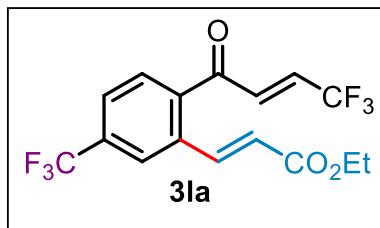

4.3296  
4.3155  
4.3012  
4.2869

1.3773  
1.3630  
1.3487  
1.2556

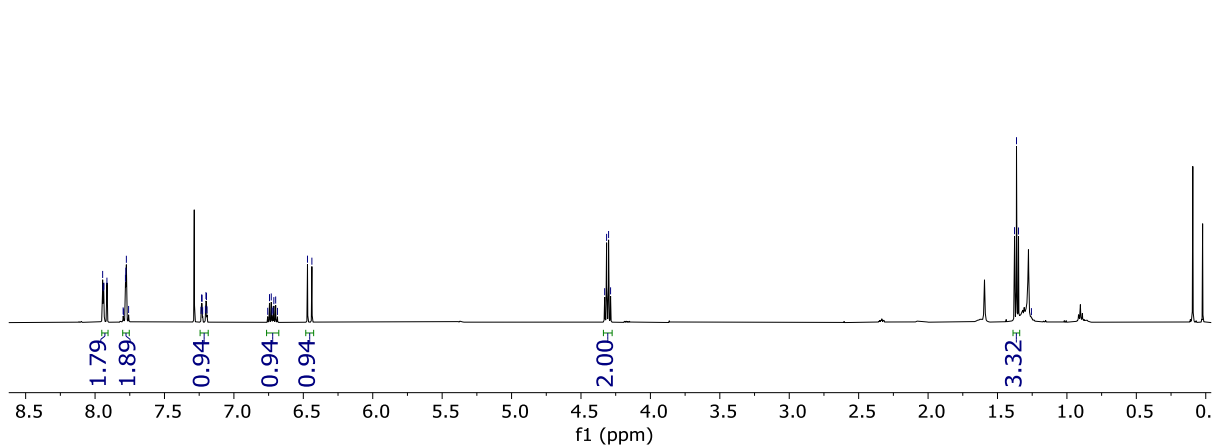

MCSHE-S034 13C.1.fid  
MCSHE-S034

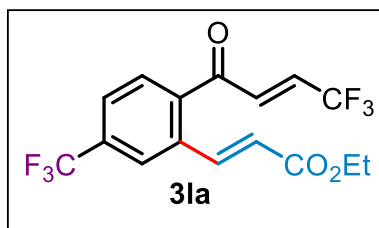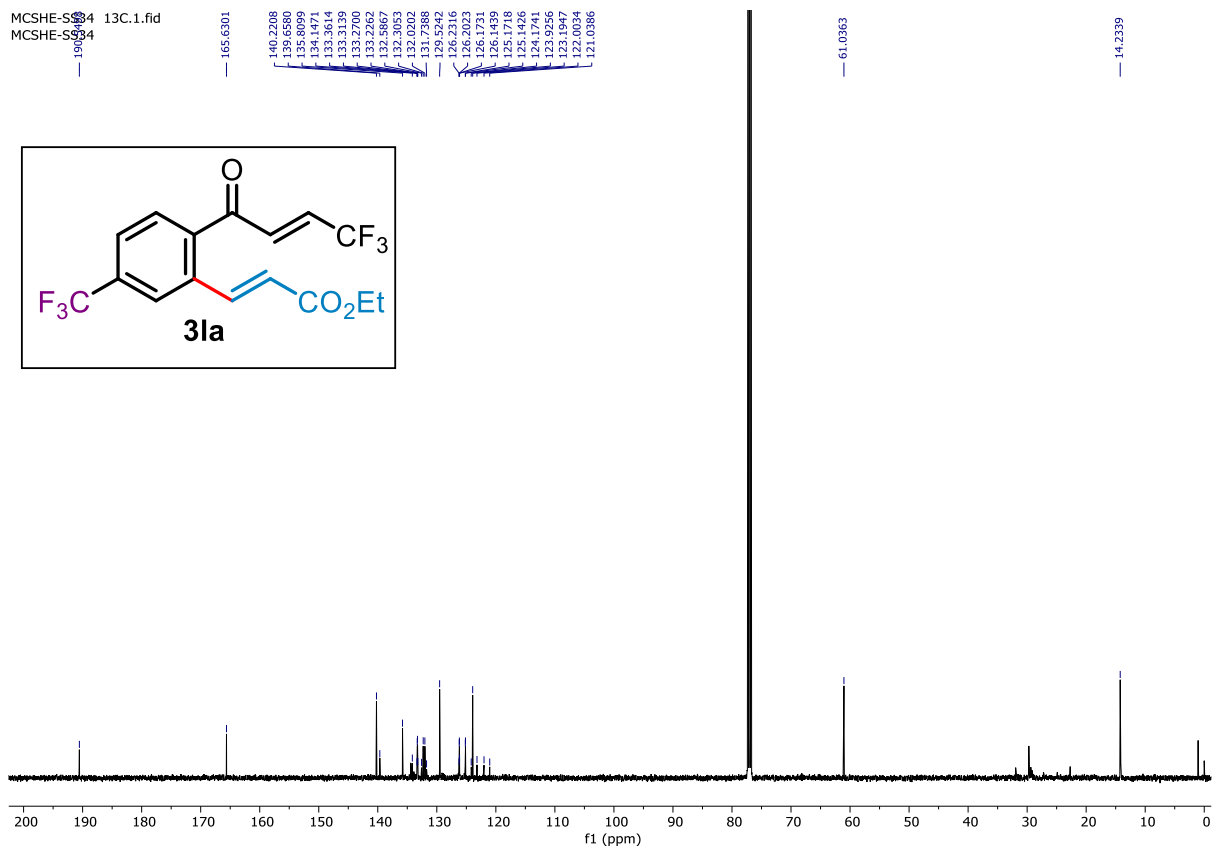



MCSHE-SS34 19F.1.fid  
MCSHE-SS34

— -63.3310  
— -65.2746

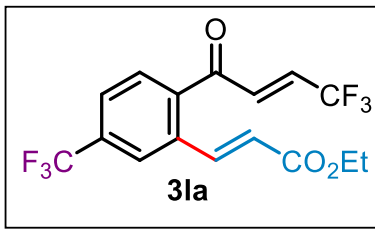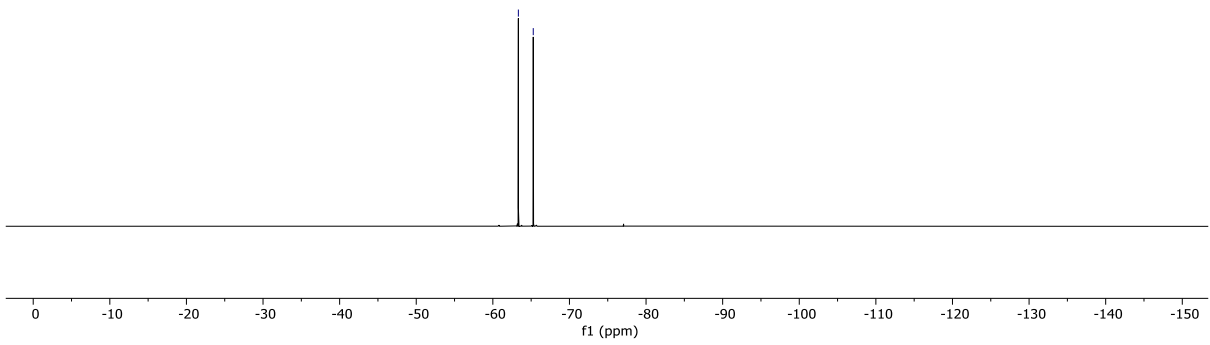

MCHS  
MCHS  
7.6387  
7.6218  
7.6090  
7.6063  
7.5216  
7.5216  
7.5051  
7.5051  
7.4899  
7.4778  
7.4725  
7.4653  
7.4653  
7.4391  
7.4391  
7.4235  
7.4235  
7.4080  
7.4080  
6.9043  
6.9006  
6.8967  
6.8927  
6.8729  
6.8689  
6.8652  
6.8613  
6.8364  
6.6233  
6.6102  
6.6050  
6.5971  
6.5919  
6.5788  
6.5656  
5.9799  
5.9476  
4.2791  
4.2650  
4.2507  
4.2364

1.3281  
1.3137  
1.2994

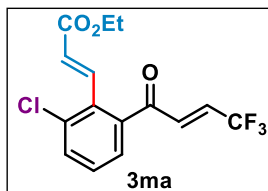

7.6246  
7.6218  
7.6090  
7.6063  
7.4809  
7.4778  
7.4725  
7.4653  
7.4653  
7.4391  
7.4391  
7.4235  
7.4080

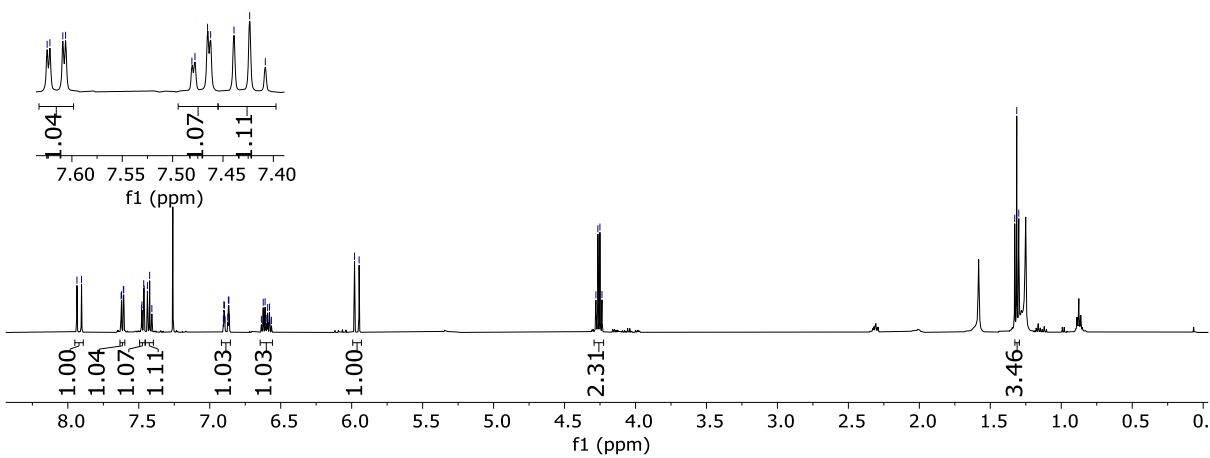

MCHSE-SS 150 13C.1.fid  
MCHSE-SS 150 13C

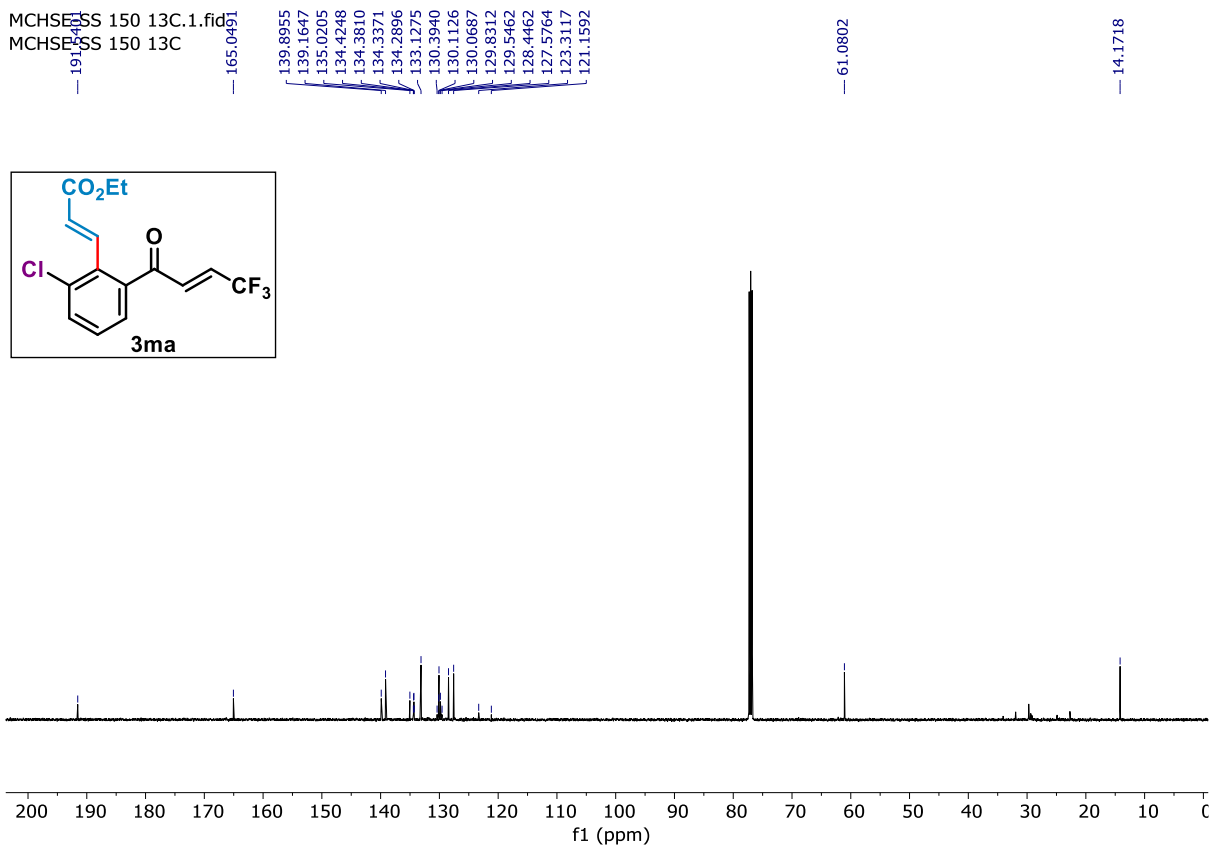

MCHSE-SS 150 19F.1.fid  
MCHSE-SS 150 19F

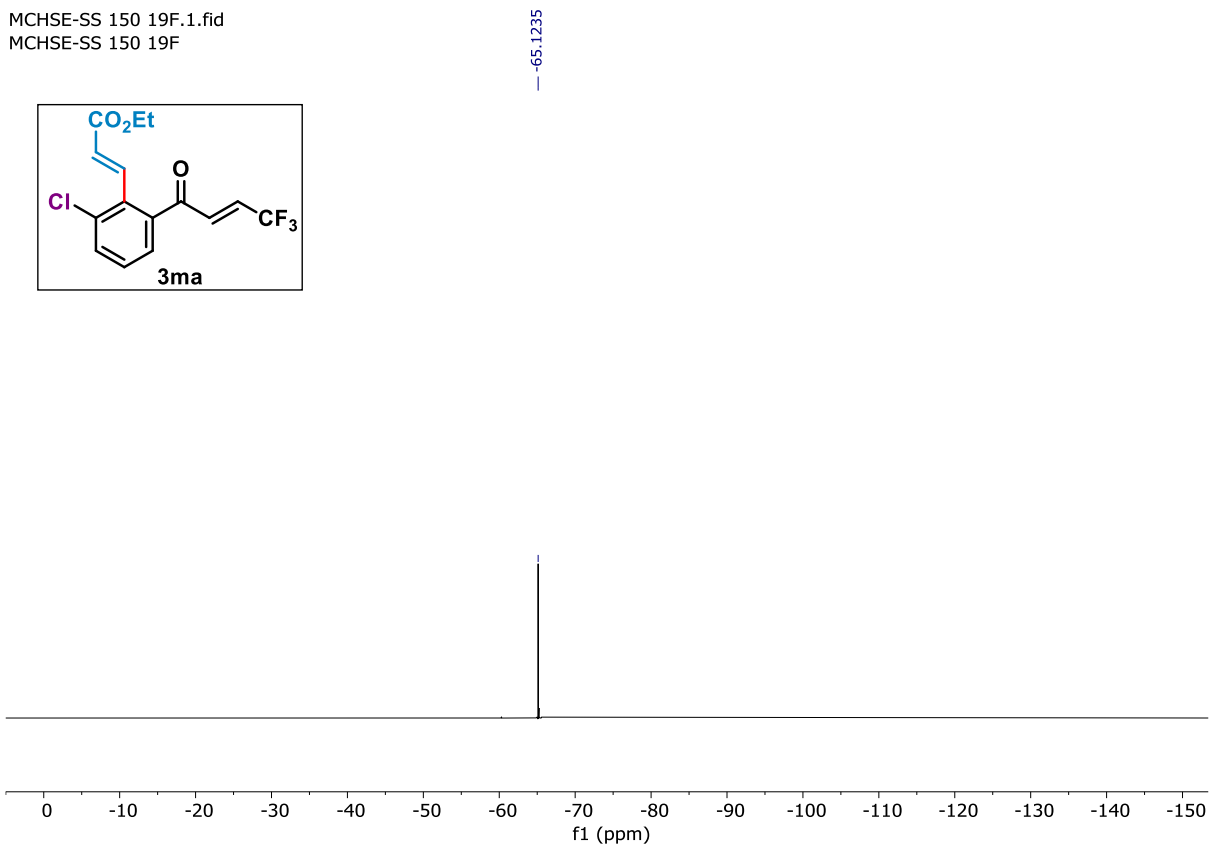

MCH  
 7.5286  
 MCH  
 7.5119  
 7.4874  
 7.4866  
 7.4872  
 7.4775  
 7.4719  
 7.0190  
 7.0063  
 6.9856  
 6.9819  
 6.9780  
 6.9743  
 6.4883  
 6.4758  
 6.4630  
 6.4563  
 6.4502  
 6.4438  
 6.4291  
 6.4181  
 6.3974

4.2908  
 4.2765  
 4.2622  
 4.2481

1.3505  
 1.3362  
 1.3221

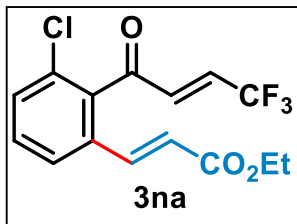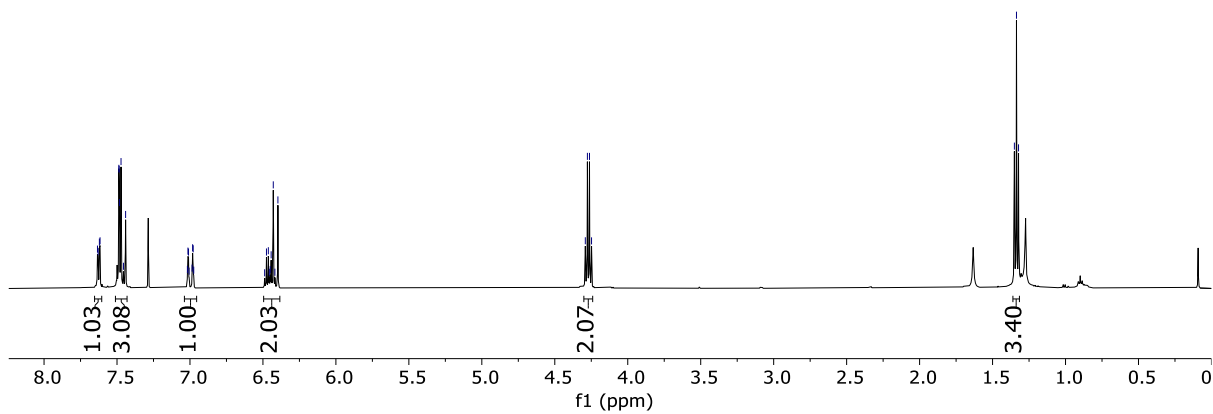

MCH  
 192.776  
 E-SS117 13C.1.f1  
 139.0112  
 137.2863  
 135.1703  
 135.1265  
 135.0826  
 135.0388  
 134.5820  
 132.3491  
 132.0641  
 131.7790  
 131.3807  
 131.4940  
 131.3076  
 130.9860  
 125.5153  
 125.3618  
 123.3117  
 123.2094  
 121.0569  
 118.9008  
 60.9779  
 14.2229

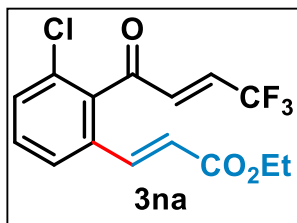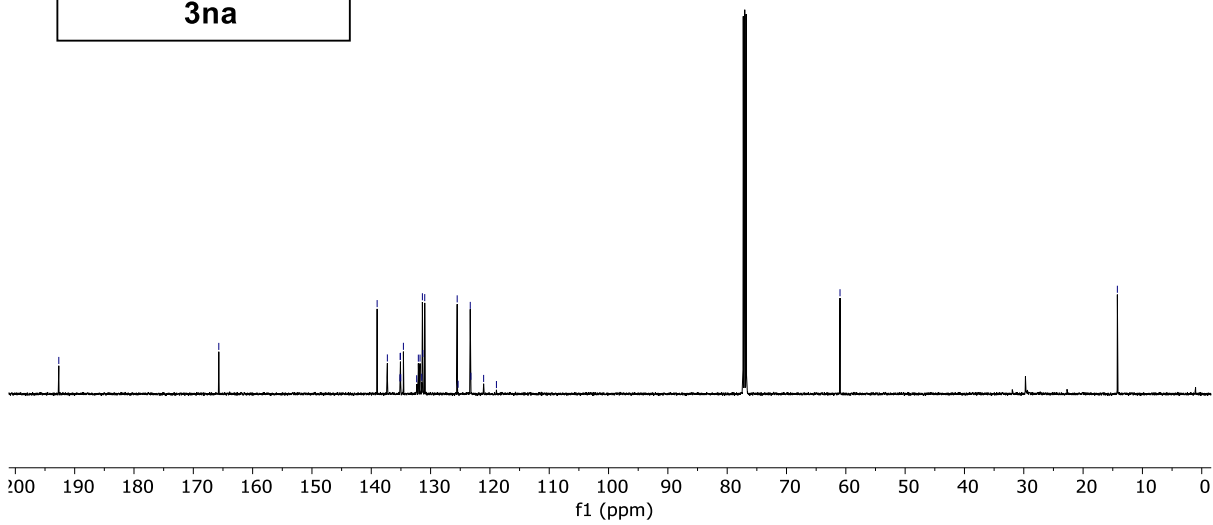

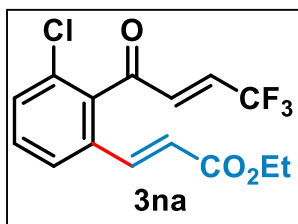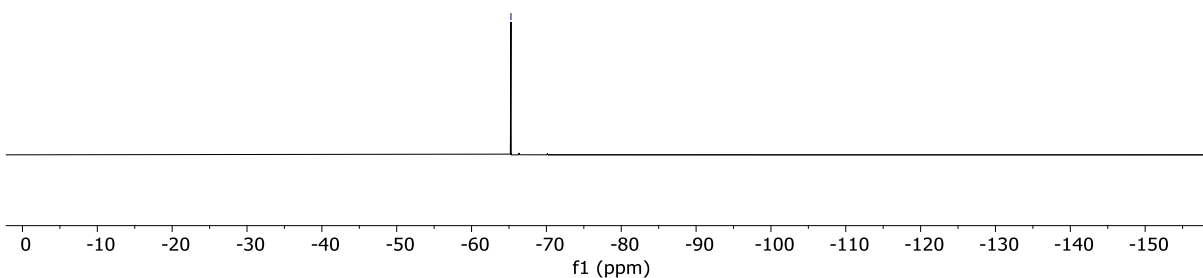

MCHSE-SS117 19F.1.fid  
MCHSE-SS117 19F  
7.7676  
7.7597  
7.7569  
7.7587  
7.7580  
6.9799  
6.9793  
6.9683  
6.9656  
6.9449  
6.9412  
6.9373  
6.9336  
6.9367  
6.4867  
6.4738  
6.4613  
6.4546  
6.4485  
6.4418  
6.4293  
6.4165  
6.4095  
6.3777

4.2690  
4.2547  
4.2404  
4.2263

1.3256  
1.3113  
1.2970

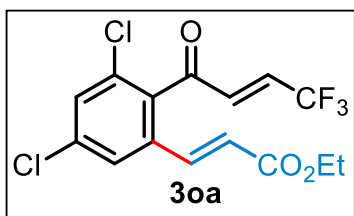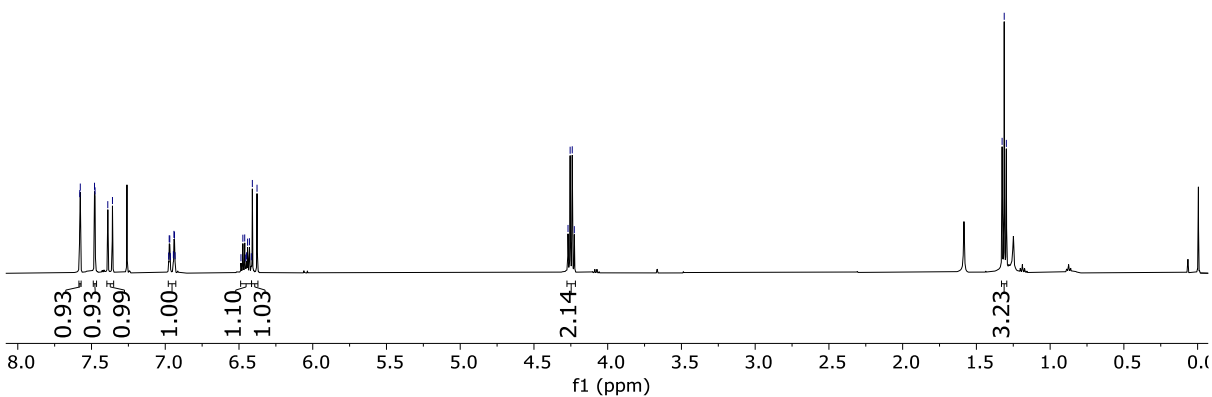

MCHSE-SS52 13C.1.fid  
MCHSE-SS52 13C

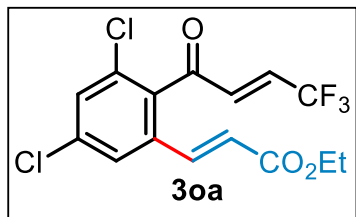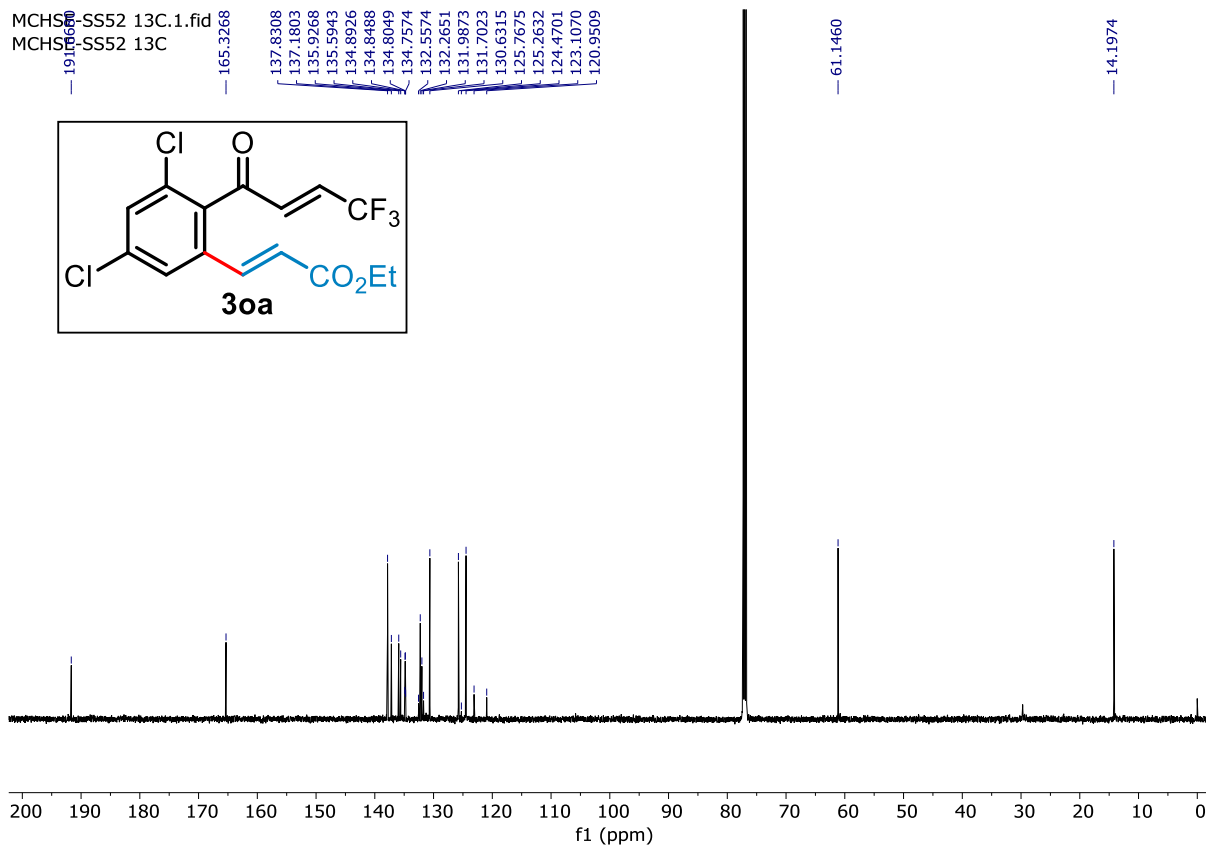

MCHSE-SS52 19F.1.fid  
MCHSE-SS52 19F

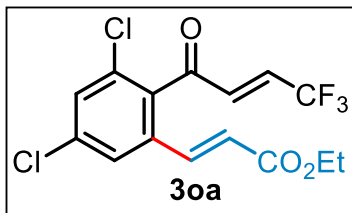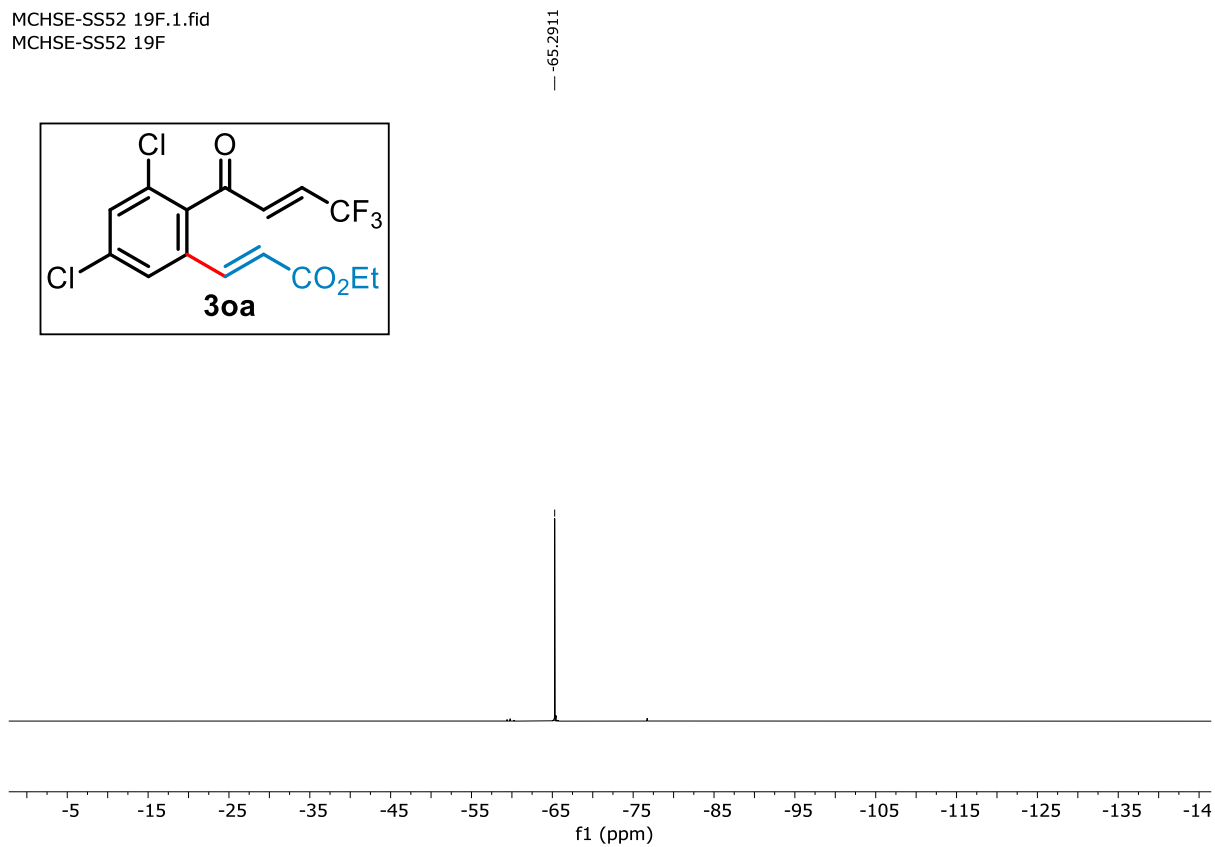

MCHSE-81117  
MCHSE-81117  
8.0860  
7.7005  
7.7011  
7.5916  
7.5916  
7.6678  
7.6708  
7.6580  
7.6549  
7.6107  
7.6073  
7.5957  
7.5924  
7.5805  
7.5771  
7.5338  
7.5311  
7.5186  
7.5158  
7.5036  
7.5009  
7.0710  
7.0680  
7.0652  
7.0622  
7.0591  
7.0561  
7.0533  
6.3770  
6.3452  
4.3213  
4.3070  
4.2930  
4.2786

2.2267  
2.2233

1.3764  
1.3621  
1.3481

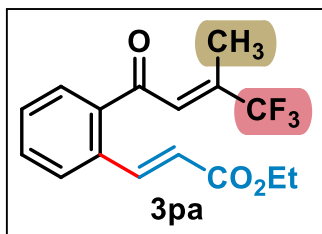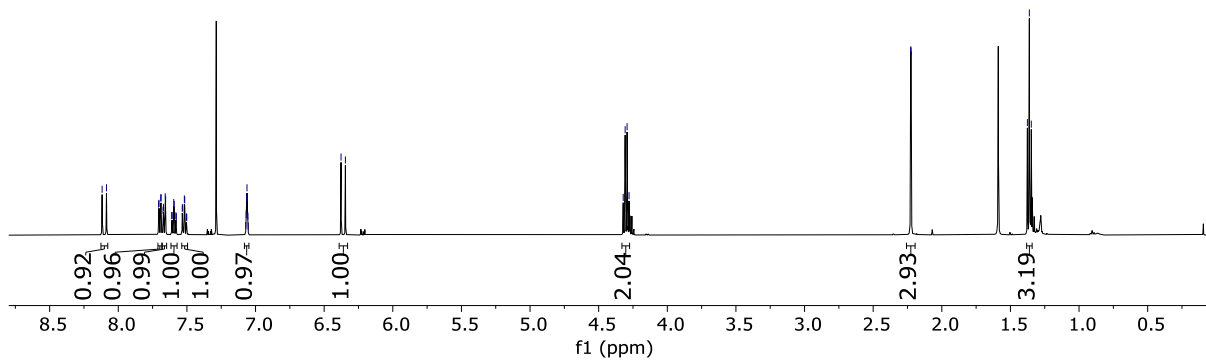

MCHSE-SS 142 13C.1.fid  
MCHSE-SS 142 13C

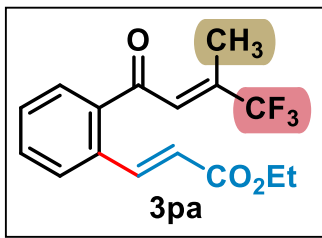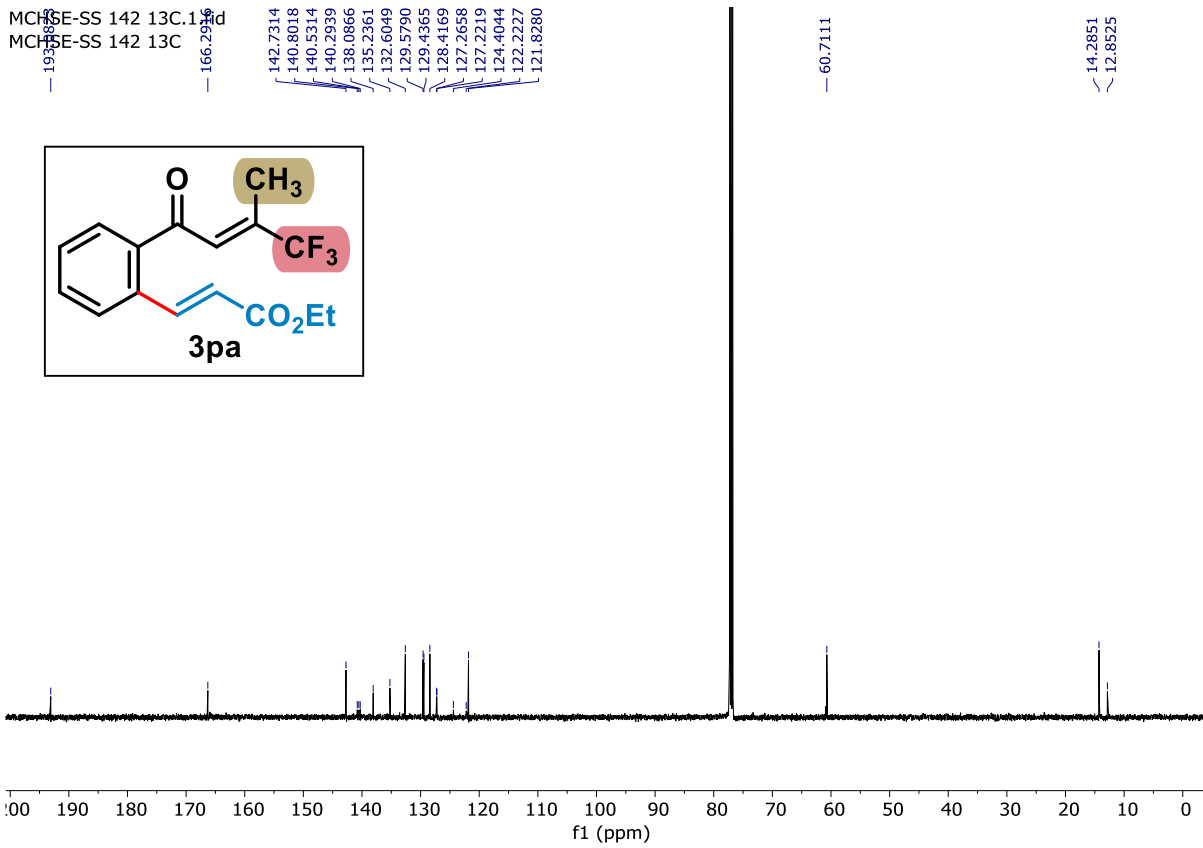

MCHSE-SS 142 19F.1.fid  
MCHSE-SS 142 19F

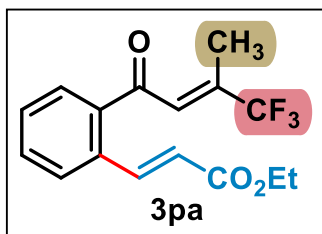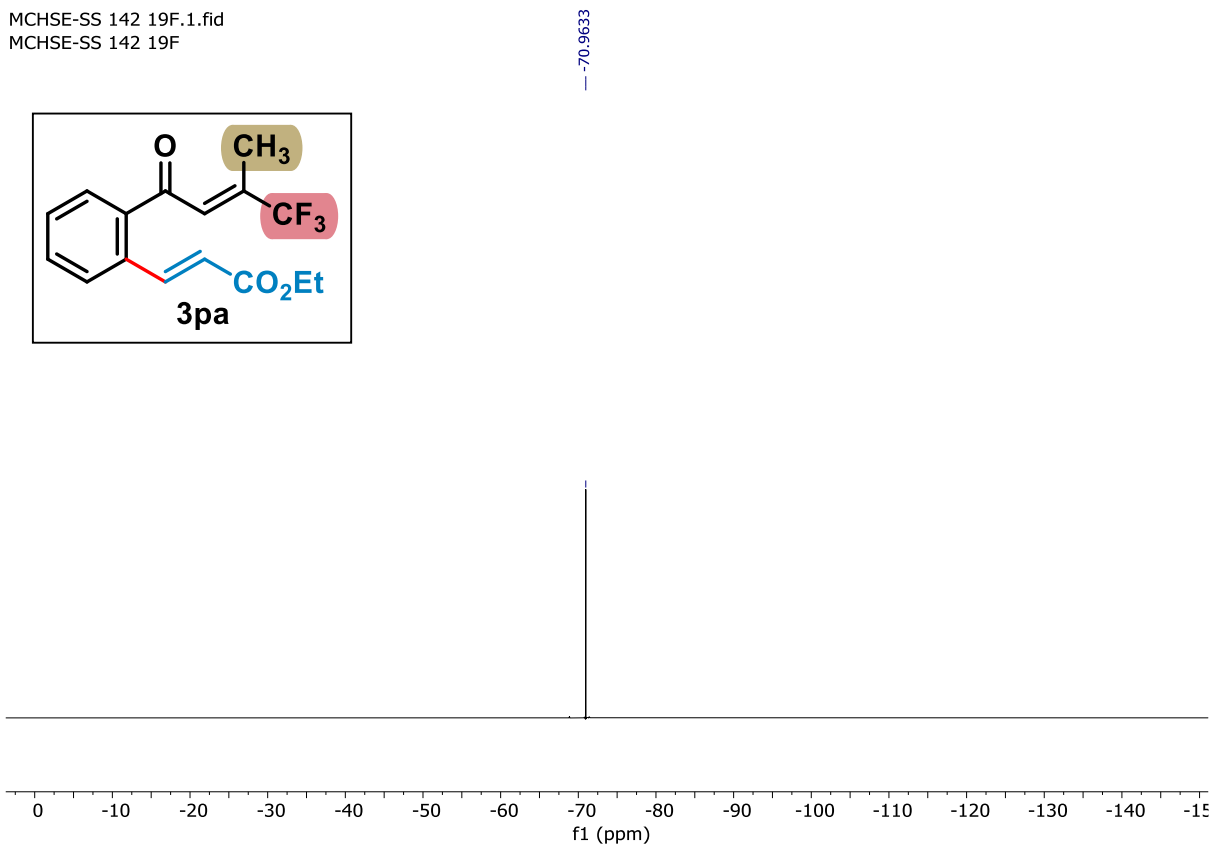

7.3650  
7.3329  
7.0600  
7.0410  
7.0100  
7.0100  
7.4885  
7.474  
7.4644  
7.4370  
7.4208  
7.4022  
6.7905  
6.7768  
6.7631  
6.7591  
6.7493  
6.7454  
6.7320  
6.7182  
6.5611  
6.5581  
6.5547  
6.5513  
6.5300  
6.5266  
6.5236  
6.5202  
6.3704  
6.3387  
4.2675  
4.2532  
4.2389  
4.2245

1.9709  
1.9679  
1.9572  
1.9541  
1.3321  
1.3177  
1.3034

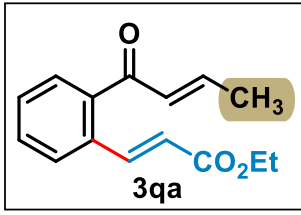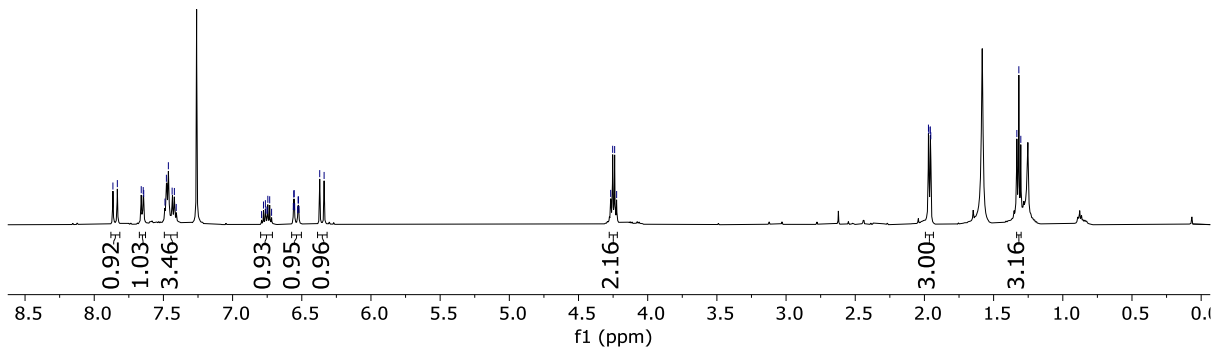

MCHSE-SS 147 13C.1.fid  
MCHSE-SS 147 13C

195.617  
166.5108  
148.2094  
142.2563  
139.8115  
133.6355  
132.2139  
130.6973  
129.3050  
128.5010  
127.3352  
120.7682  
60.6088  
18.6960  
14.3216

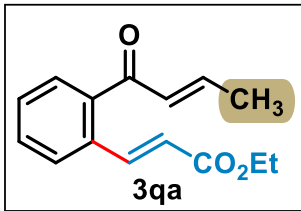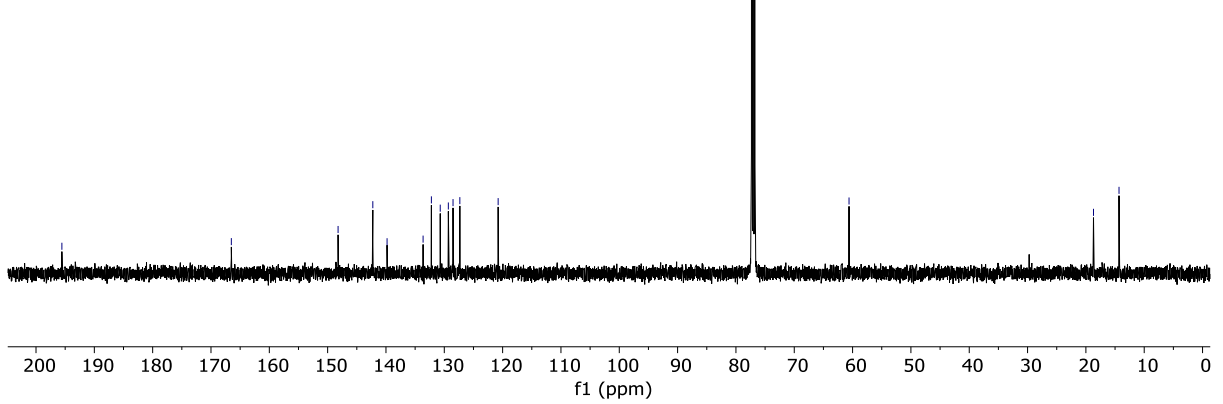



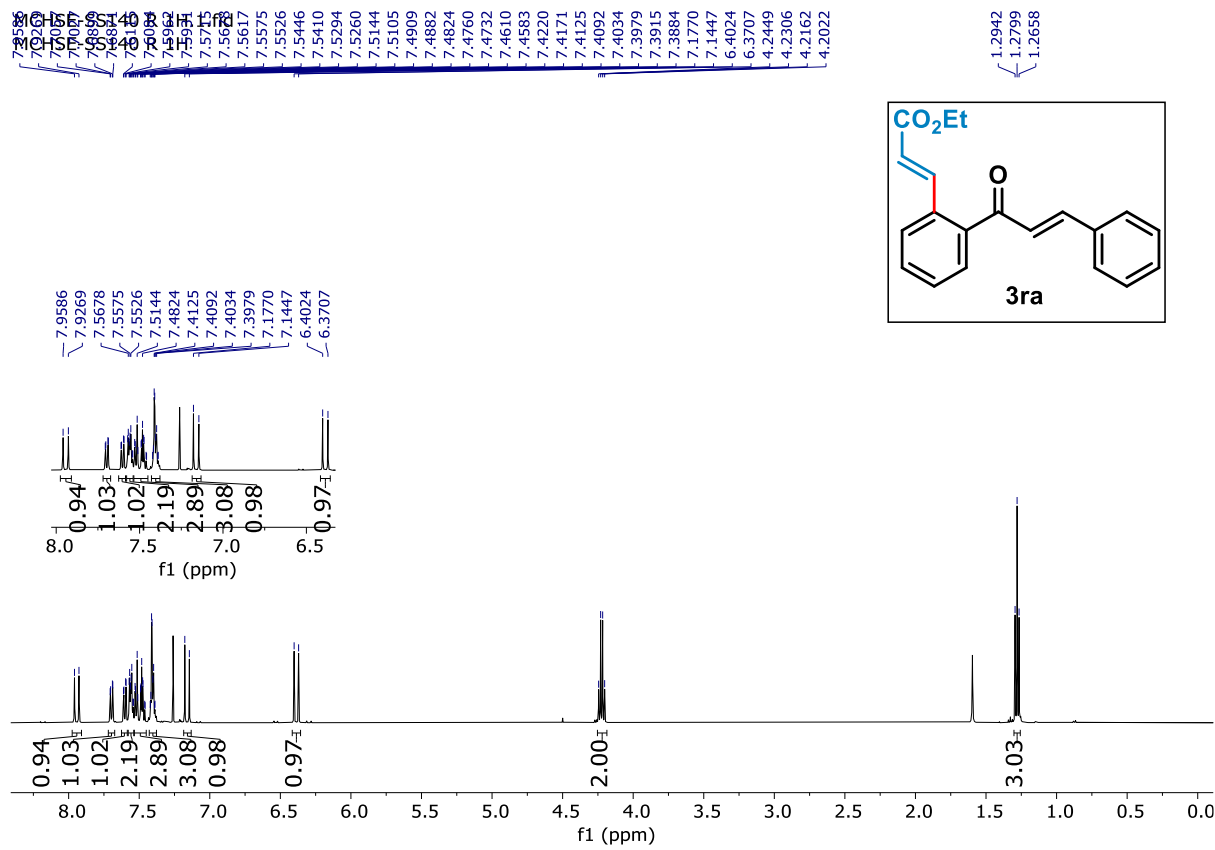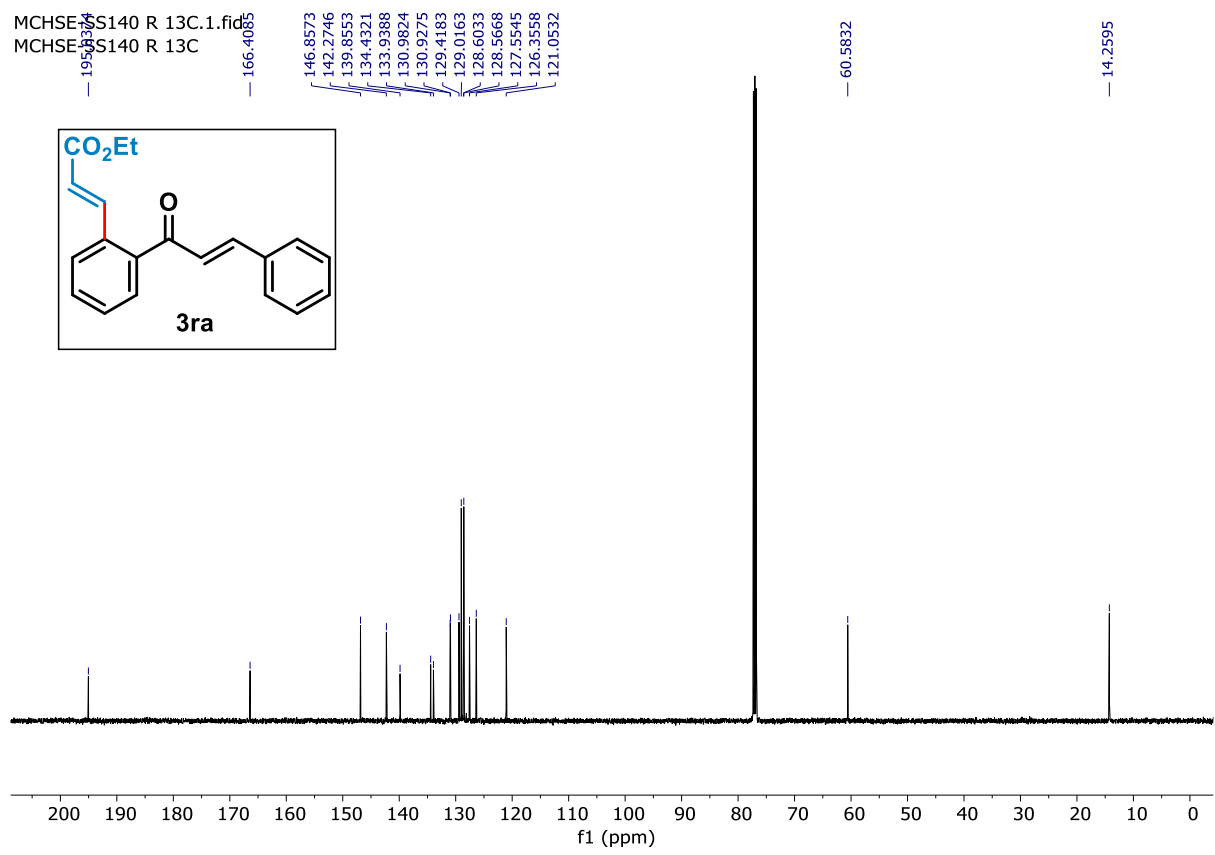

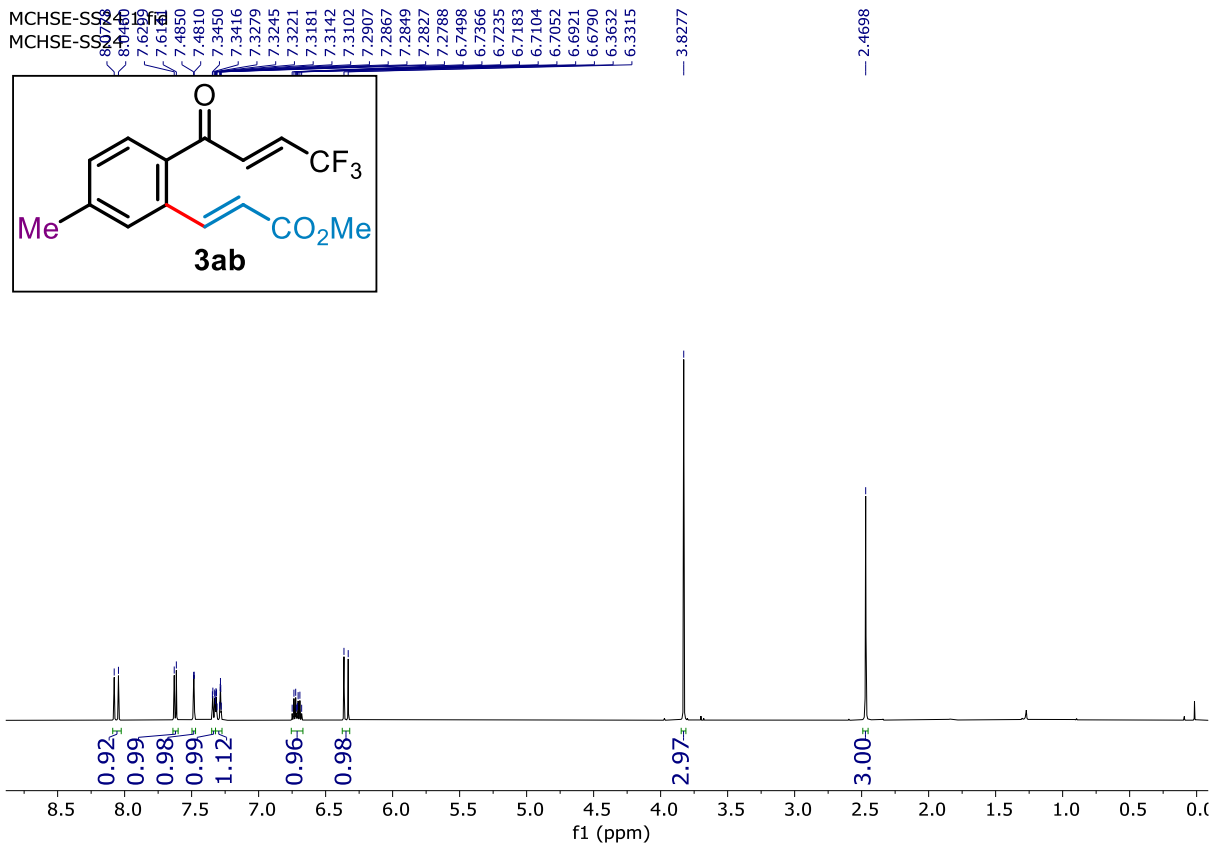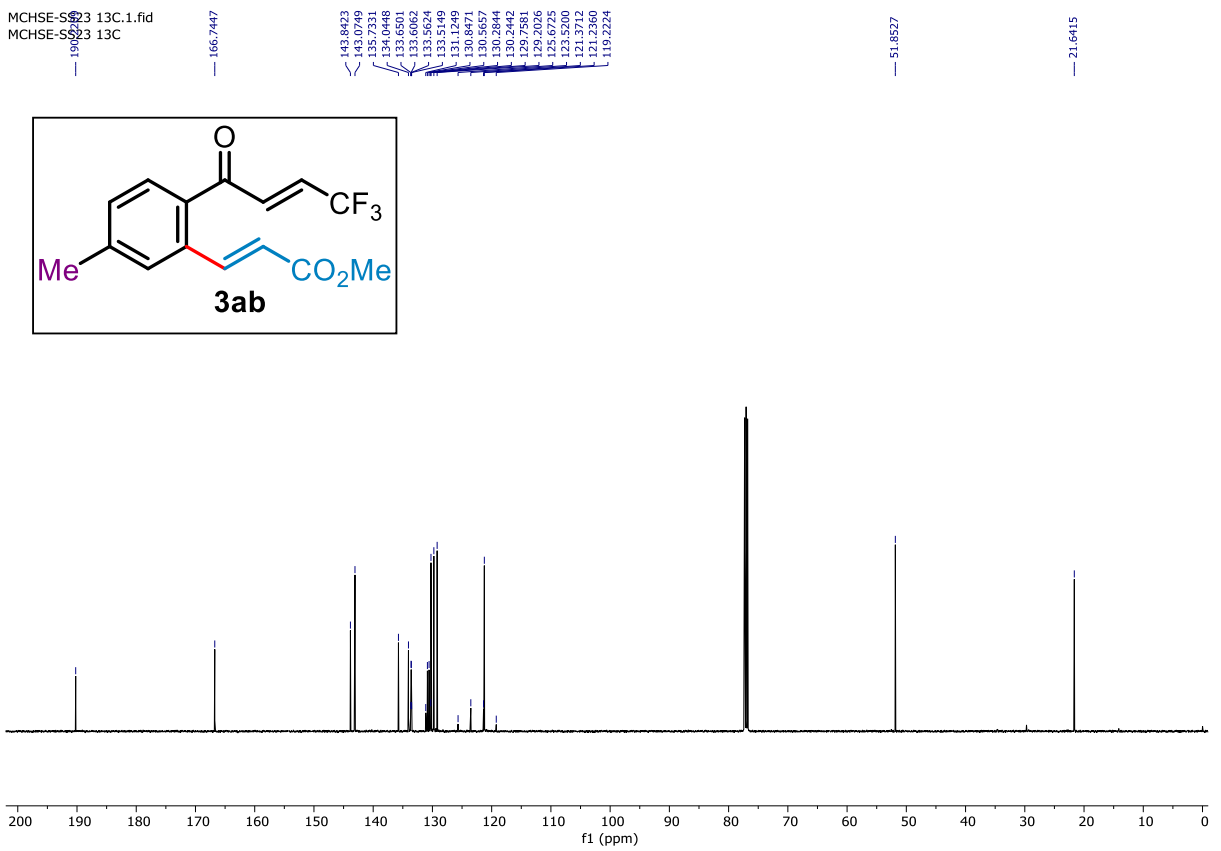

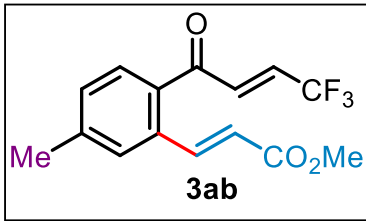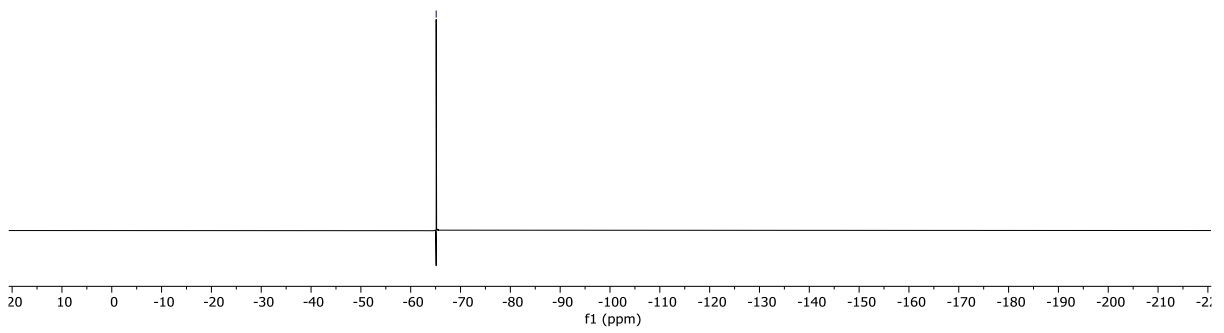

MCHSE-SS23 19F.1.fid  
MCHSE-SS23 19F

8.0364  
8.0063  
7.6005  
7.5846  
7.4717  
7.4623  
7.3186  
7.3137  
7.3027  
7.2979  
7.2905  
7.2866  
7.2826  
7.2786  
7.2600  
7.2551  
7.2512  
7.2472  
6.7252  
6.7121  
6.6990  
6.6941  
6.6859  
6.6810  
6.6676  
6.6544  
6.3466  
6.3149  
4.2242  
4.2108  
4.1973

2.4468  
1.7137  
1.7003  
1.6853  
1.6698  
1.6563  
1.4663  
1.4513  
1.4361  
1.4211  
1.4062  
1.3915  
0.9736  
0.9586  
0.9440

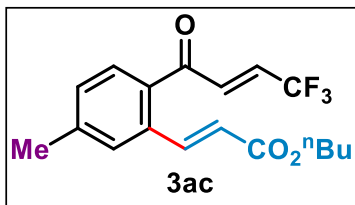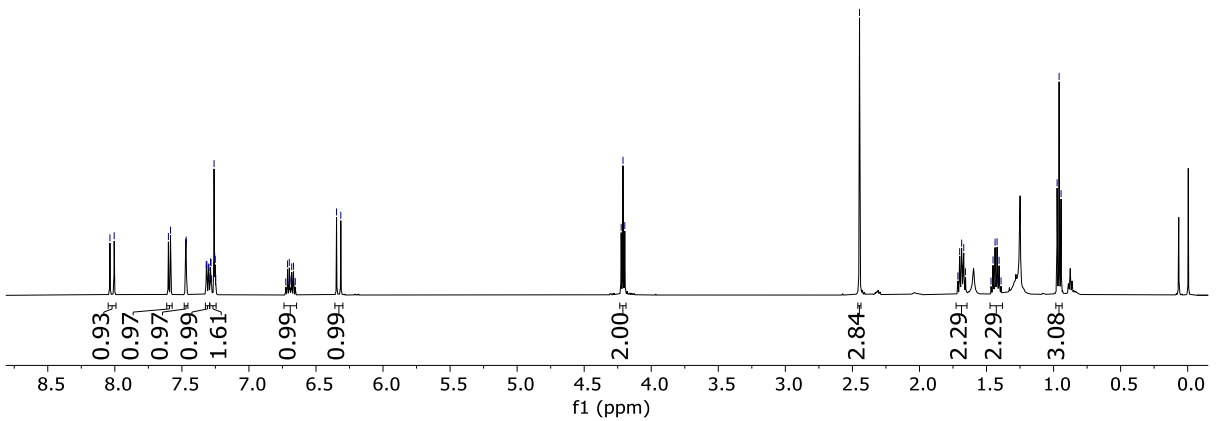

MCHSE-SS 73 13C.1.fid  
MCHSE-SS 73 13C

143.7583  
142.7241  
135.7514  
134.1142  
133.7159  
133.6282  
133.5843  
131.0920  
130.8143  
130.5329  
130.2515  
130.2003  
129.7435  
129.2063  
125.6798  
123.5273  
121.7878  
121.3785

64.6323

30.7301

21.6597  
19.1930  
13.7698

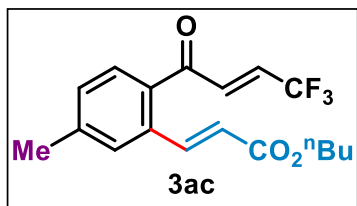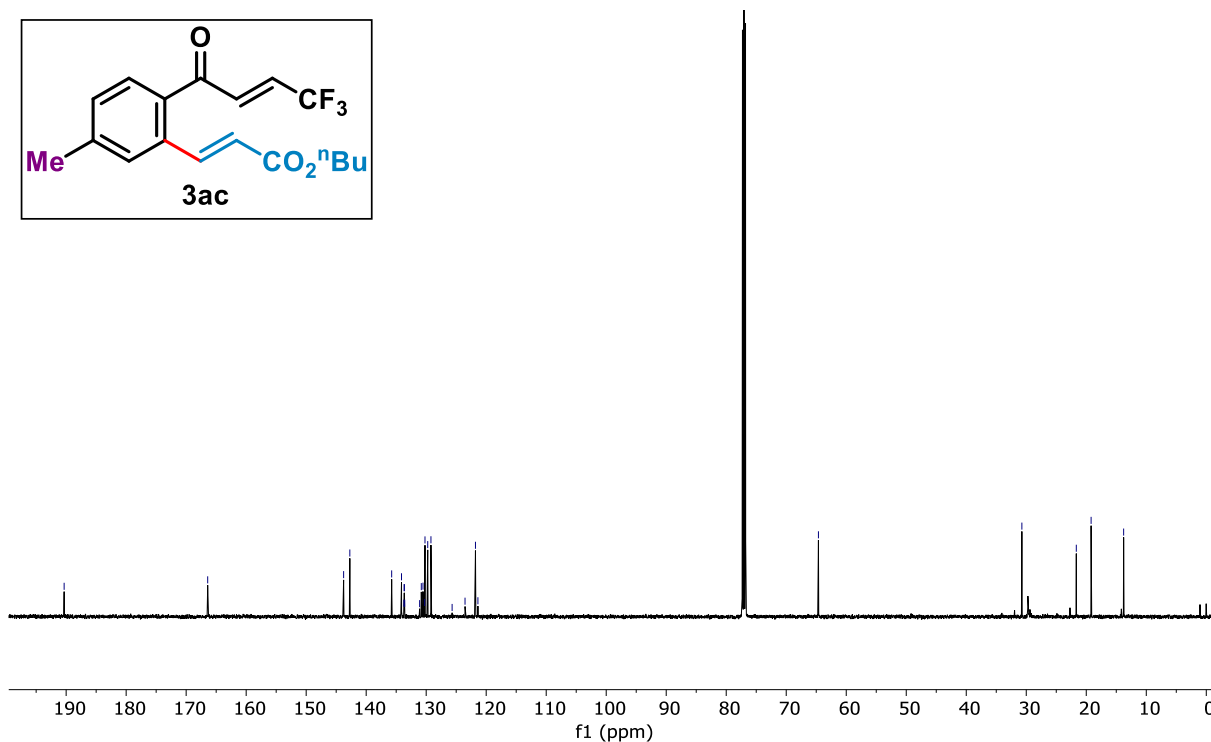

MCHSE-SS 73 19F.1.fid  
MCHSE-SS 73 19F

65.0977

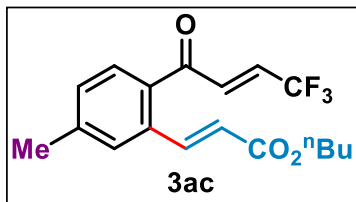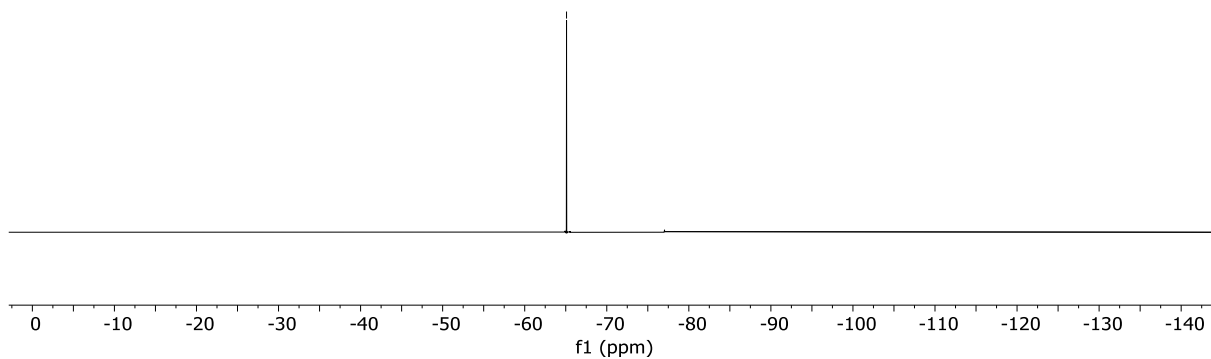

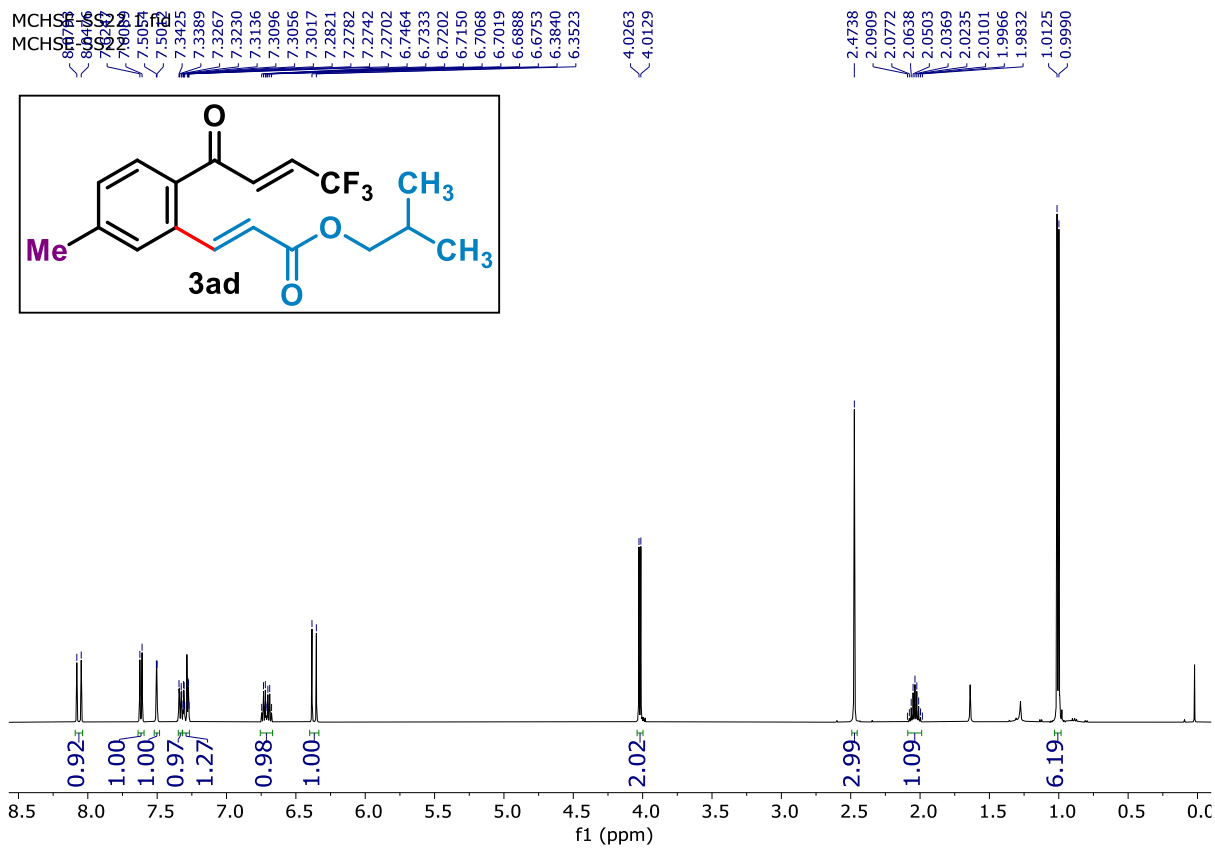

S

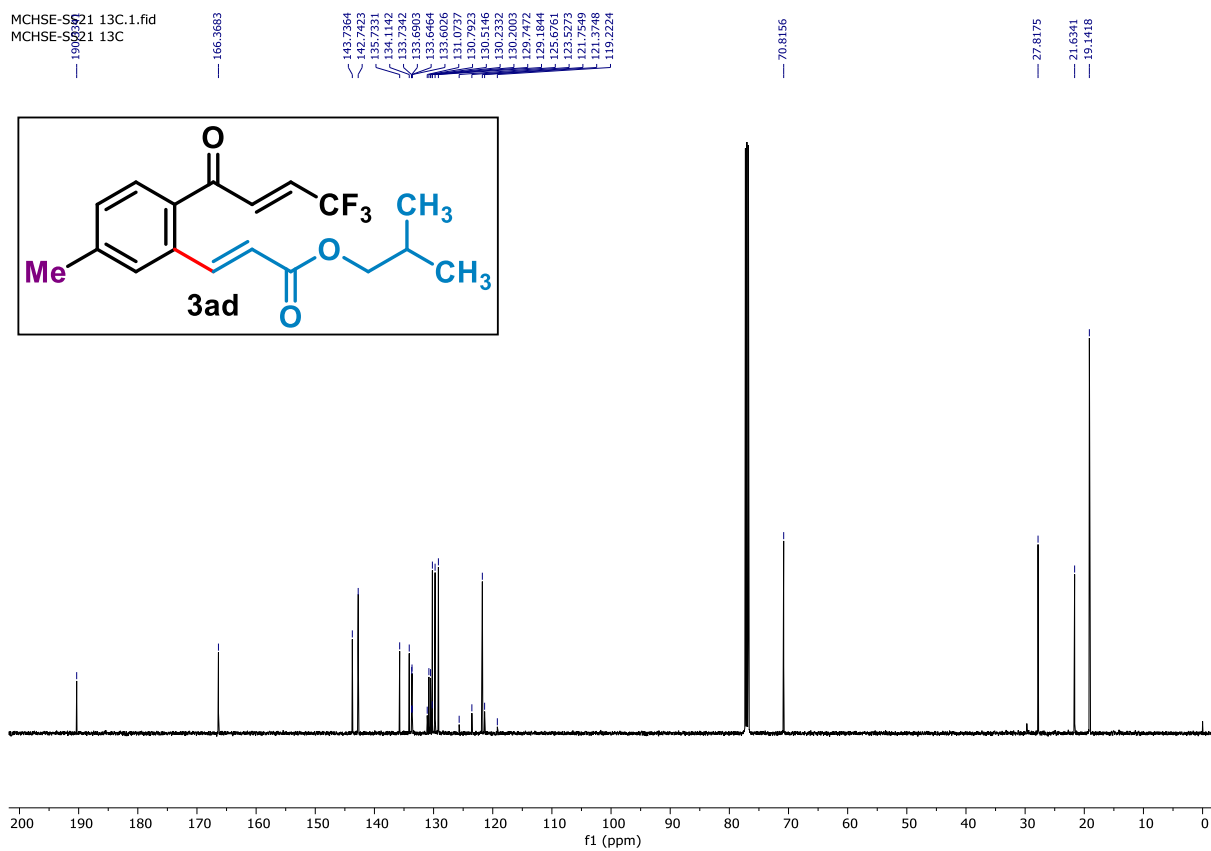

MCHSE-SS21 19F,1.fid  
MCHSE-SS21 19F

-65.1014

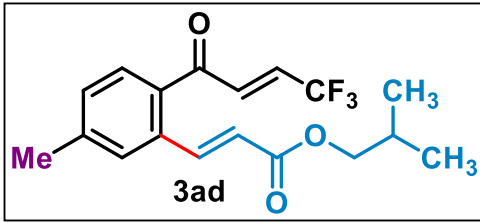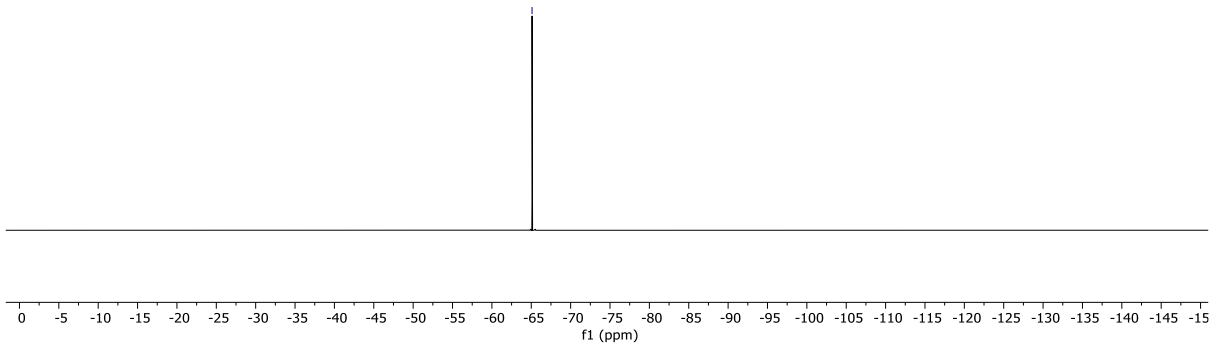

MCHSE-SS44  
MCHSE-SS44

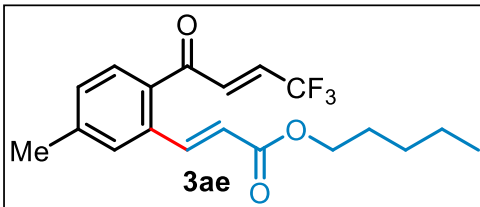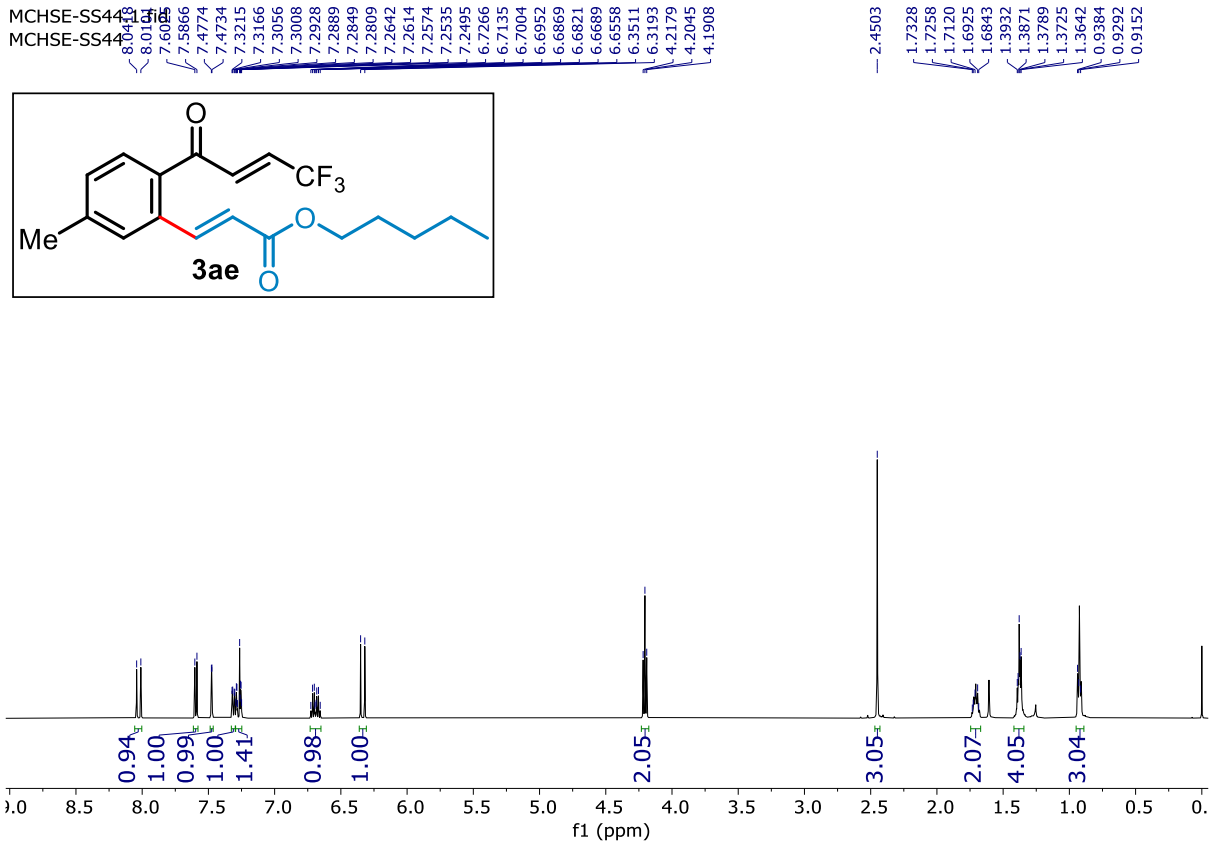

MCHSE-SS44 13C.1.fid  
MCHSE-SS44

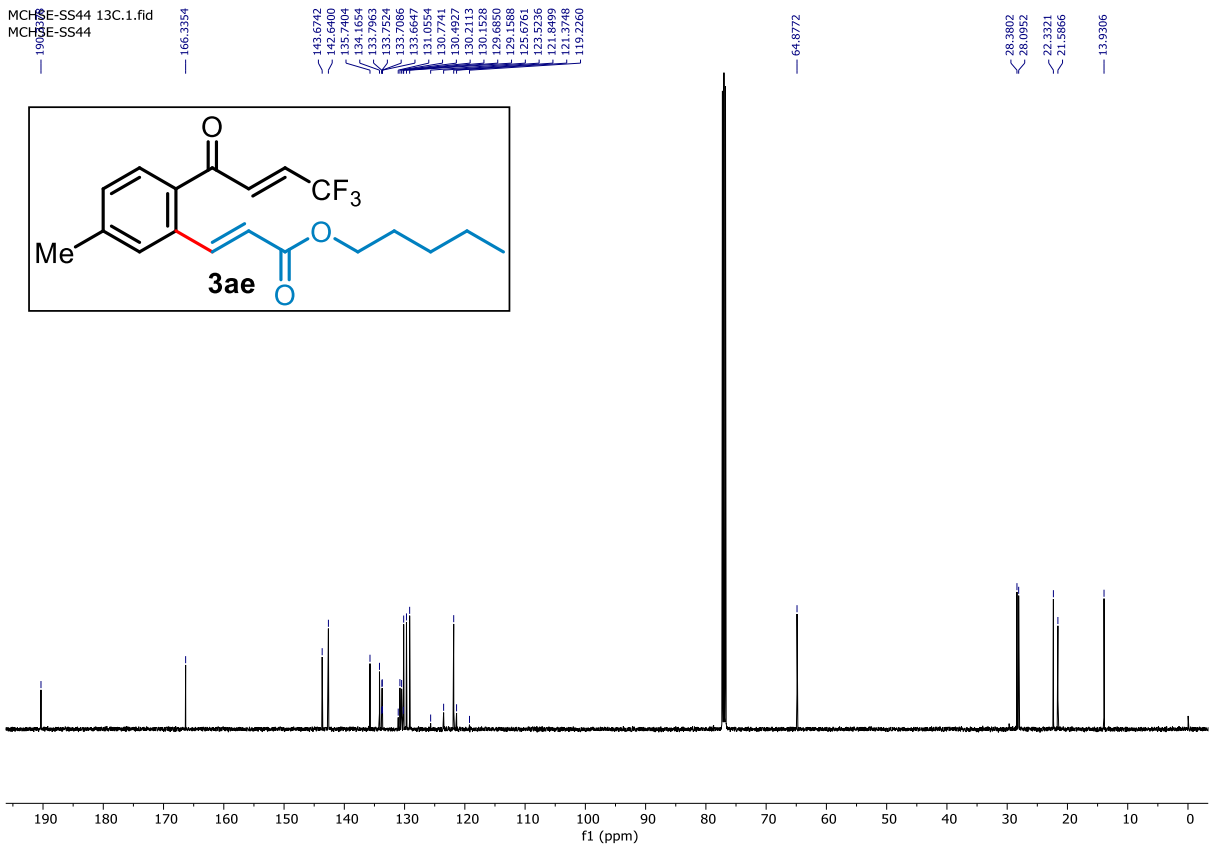

MCHSE-SS44 19F.1.fid  
MCHSE-SS44

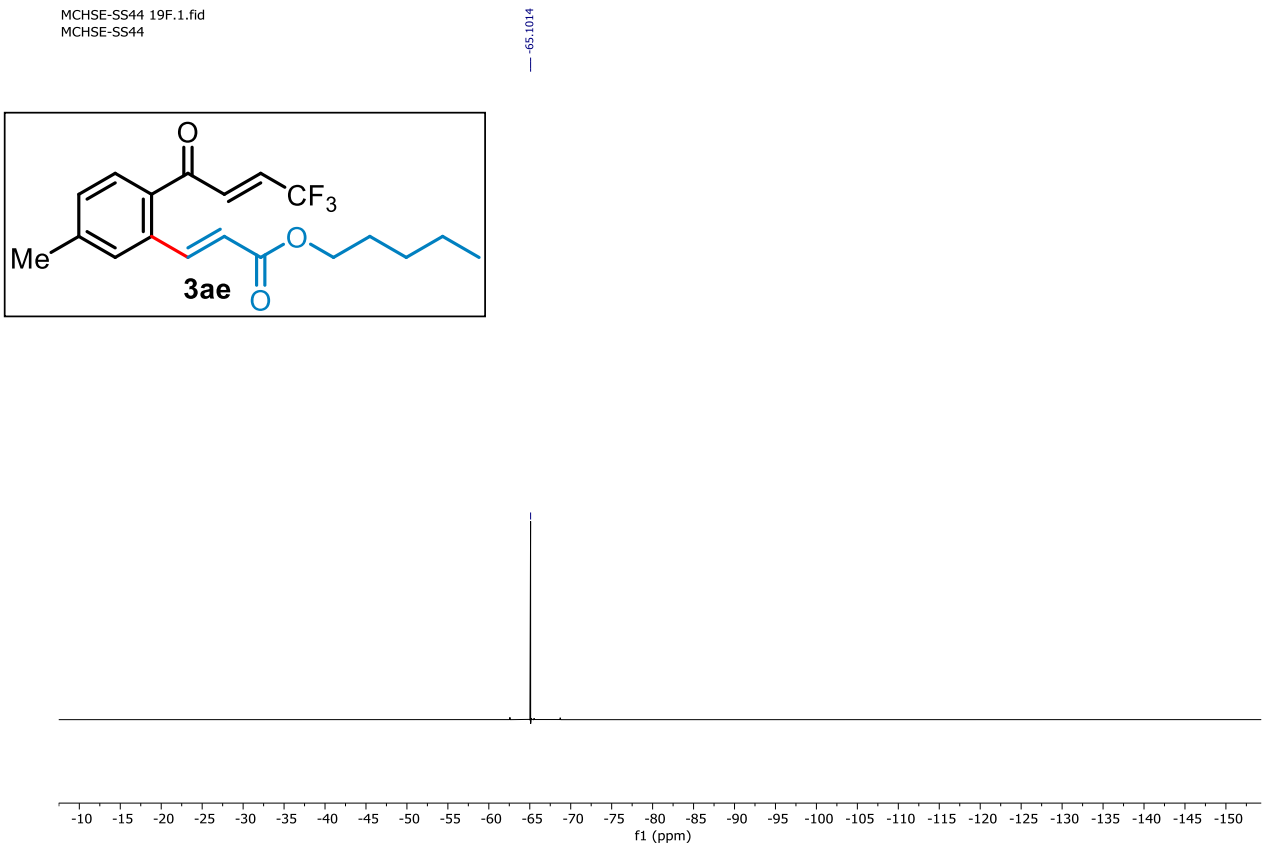

MCSHSE-1H SS 56  
MCSHSE-1H SS 56

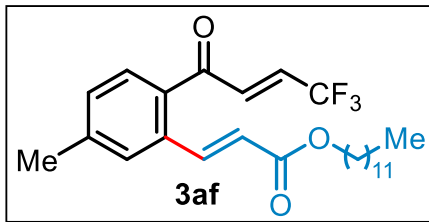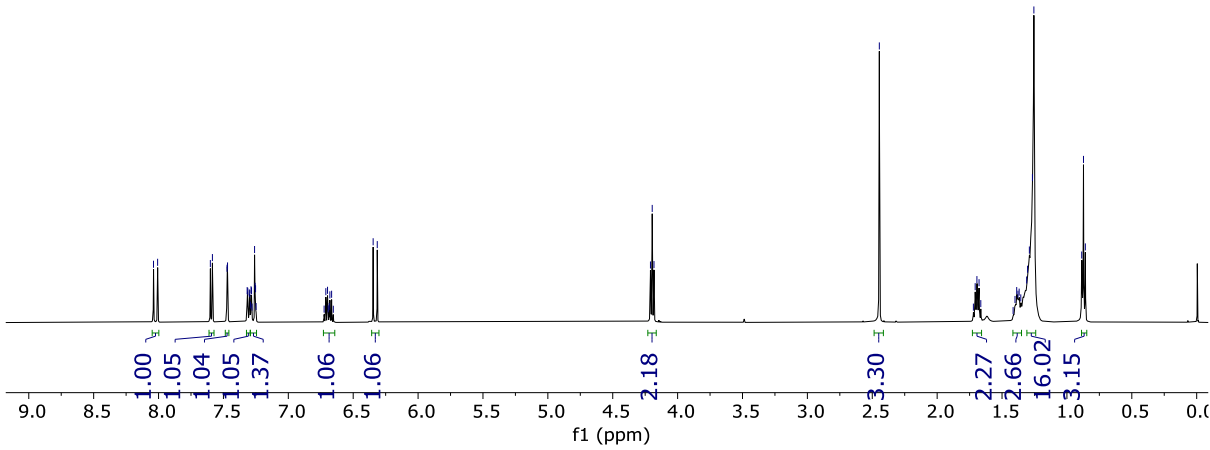

MCSHSE-13C SS 56.fid  
MCSHSE-13C SS 56

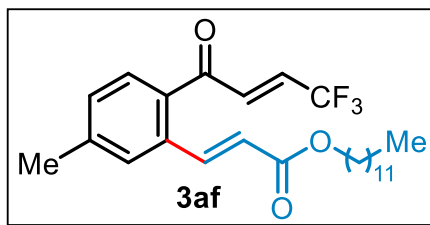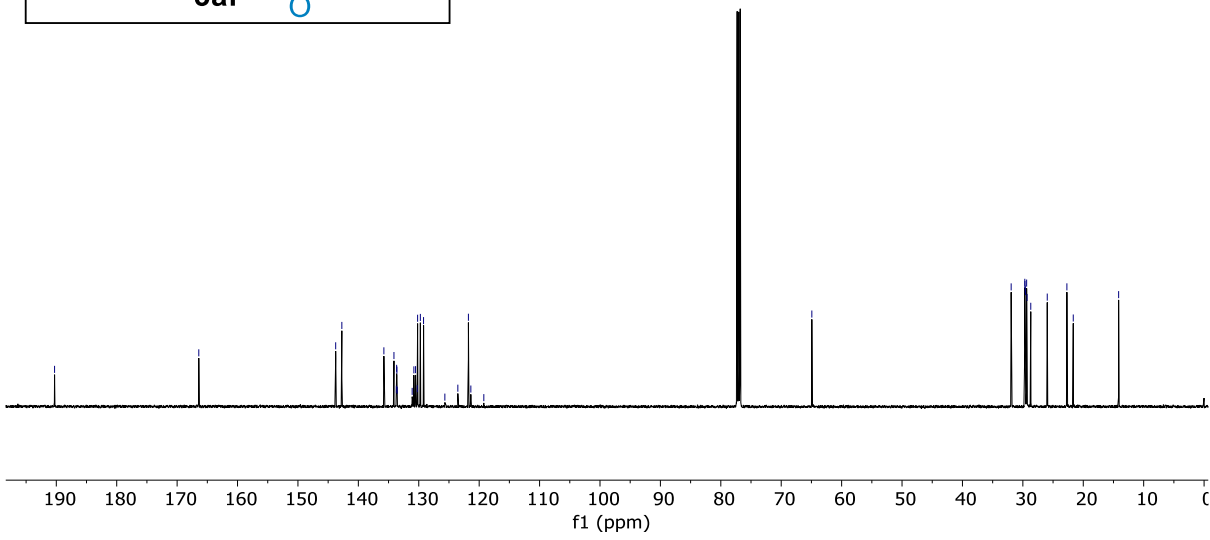



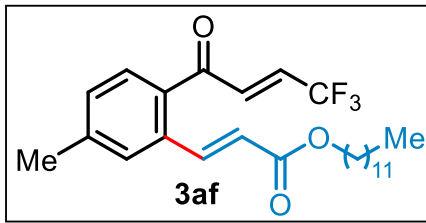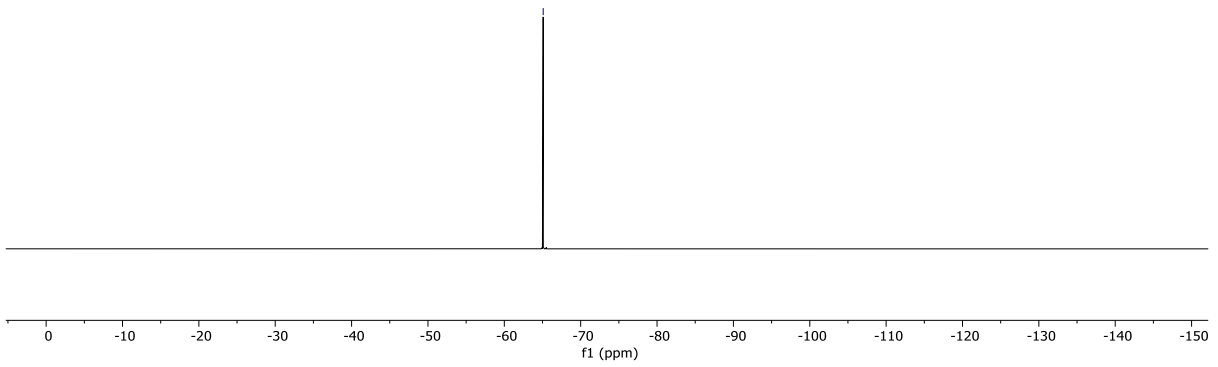

MCSHSE-19F SS 56.1.fid  
MCSHSE-1H9FSS 56

7.9890  
7.7776  
7.6669  
7.3183  
7.3183  
7.3183  
7.3183  
7.2882  
7.2882  
7.2813  
7.2600  
7.2538  
7.2227  
6.7096  
6.6962  
6.6913  
6.6830  
6.6782  
6.6650  
6.6516  
6.3453  
6.3136

4.2107  
4.1973  
4.1835

2.4464  
1.7216  
1.7081  
1.6944  
1.6782  
1.6645  
1.4012  
1.3848  
1.3674  
1.3311  
1.2935  
1.2499  
0.8893  
0.8753  
0.8612

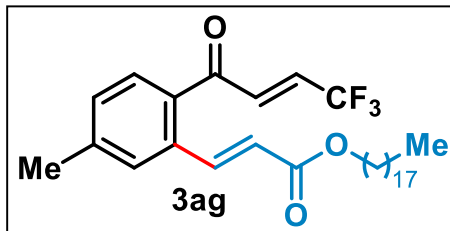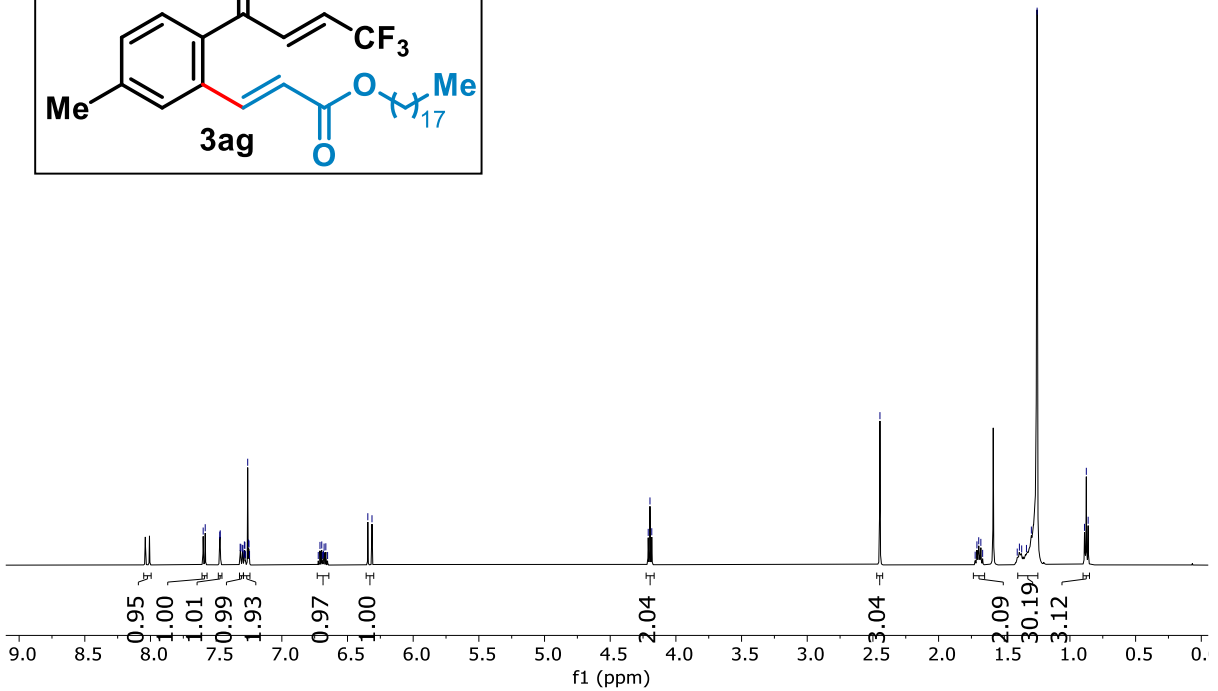

MCSHL-SS 132 13C.13.fid  
MCSHL-SS 132 13C

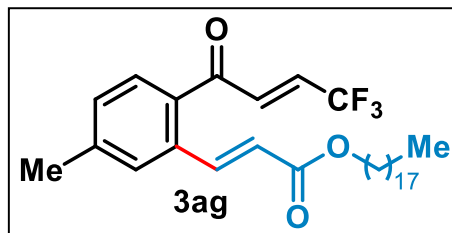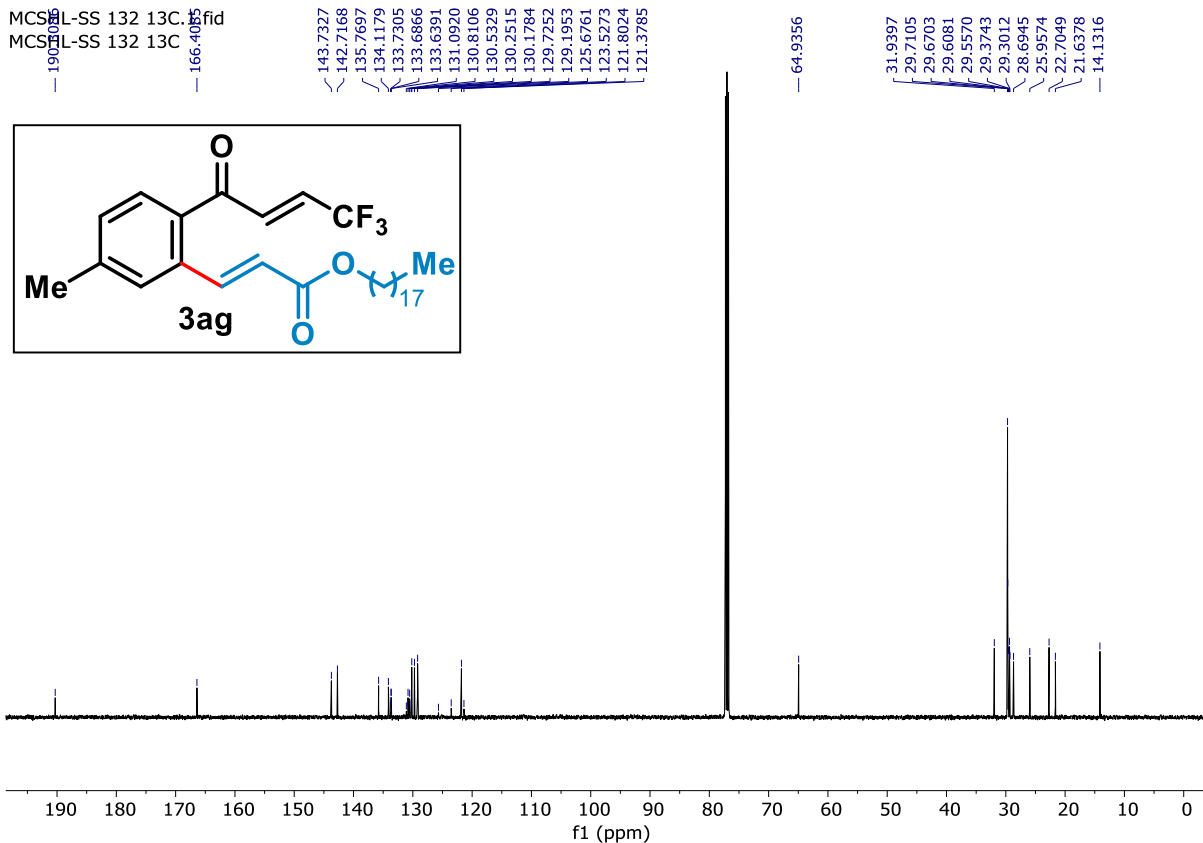

MCSHL-SS 132 19F.1.fid  
MCSHL-SS 132 19F

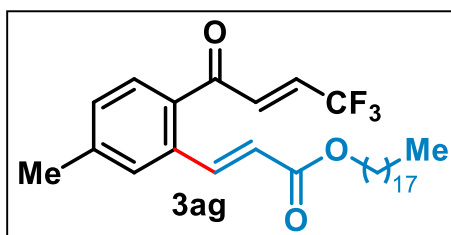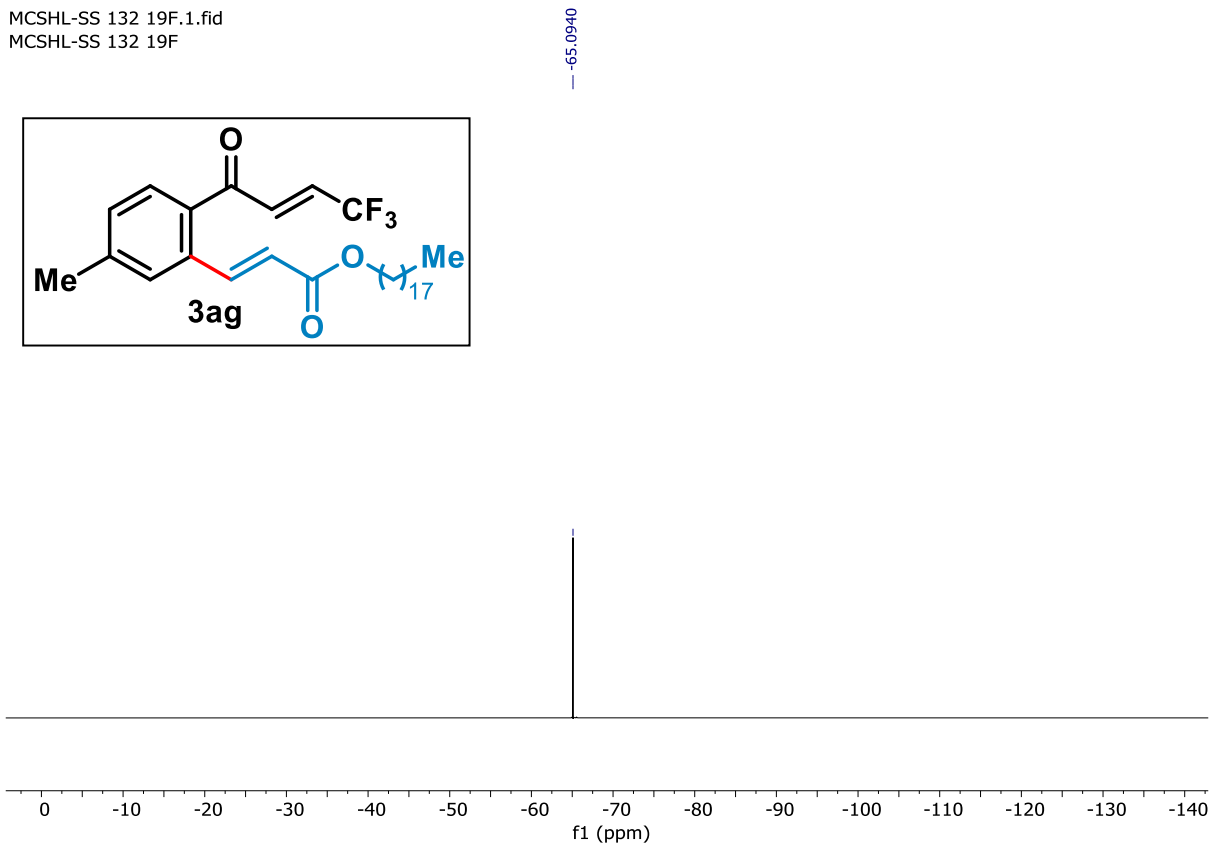

8.3724  
8.0362  
7.7676  
7.7596  
7.7552  
7.7501  
7.7273  
7.7155  
7.6186  
7.5957  
7.5914  
7.5872  
7.5832  
7.4340  
7.4246  
7.4209  
7.4179  
7.4127  
7.3989  
7.3941  
7.3831  
7.3626  
7.3483  
6.9590  
6.9450  
6.9313  
6.9273  
6.9172  
6.9136  
6.8998  
6.8858  
6.6115  
6.5798  
5.2350

— 2.4045

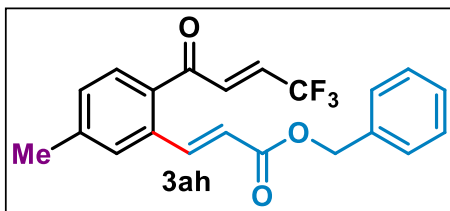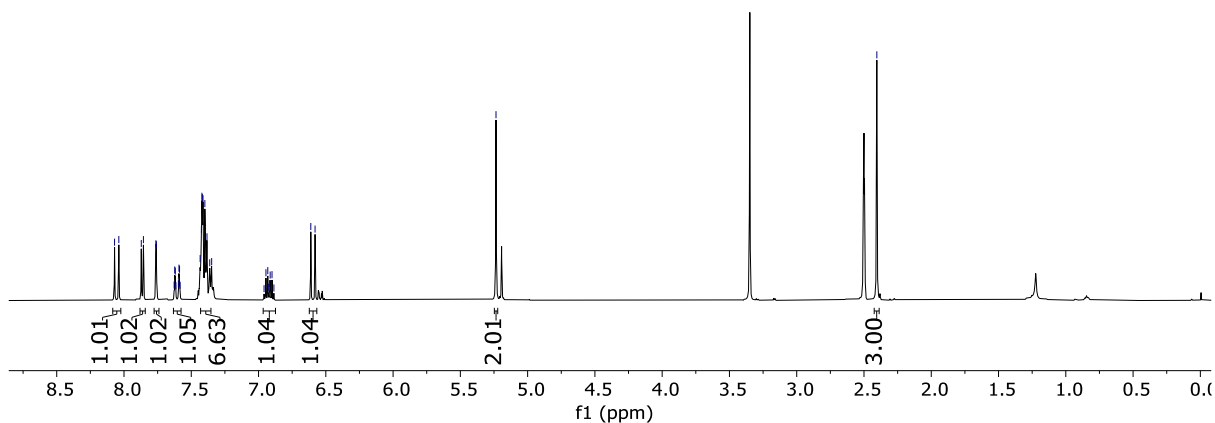

MCHSE-SS-15R 13C.1.fid  
MCHSE-SS-15R 13C

190.8869  
166.2989  
144.1237  
144.1018  
136.6394  
135.6710  
135.6235  
135.5796  
135.5321  
135.0936  
134.1581  
131.1176  
130.9641  
129.5644  
129.2977  
129.0272  
128.9578  
128.8226  
128.6691  
128.5668  
126.6518  
124.4994  
122.3506  
120.6914  
120.2018  
66.1672

— 21.4770

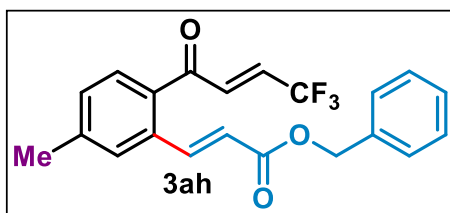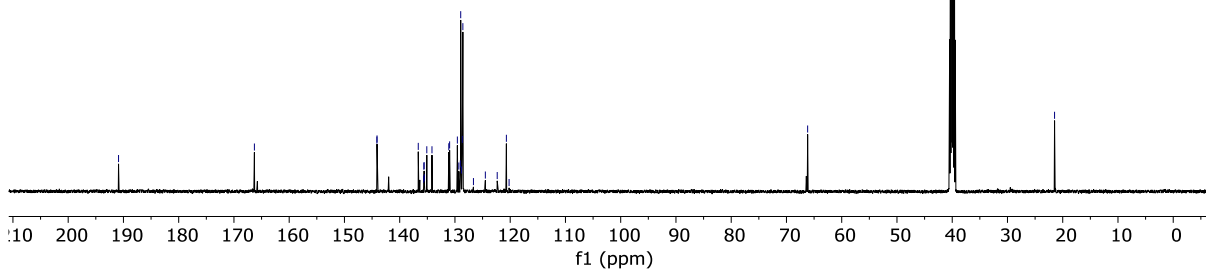

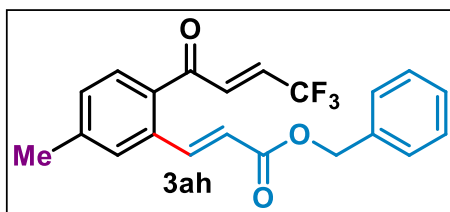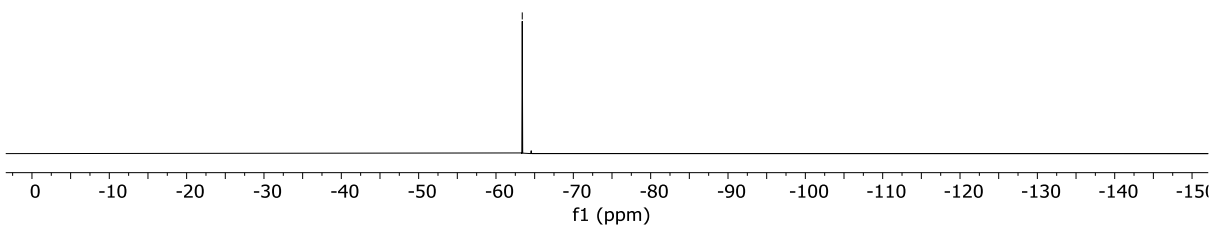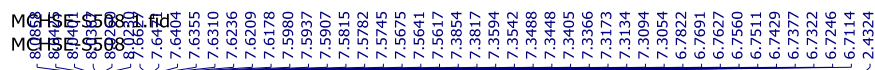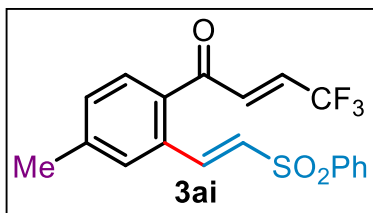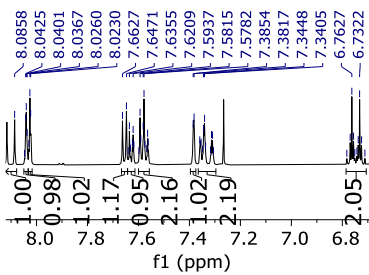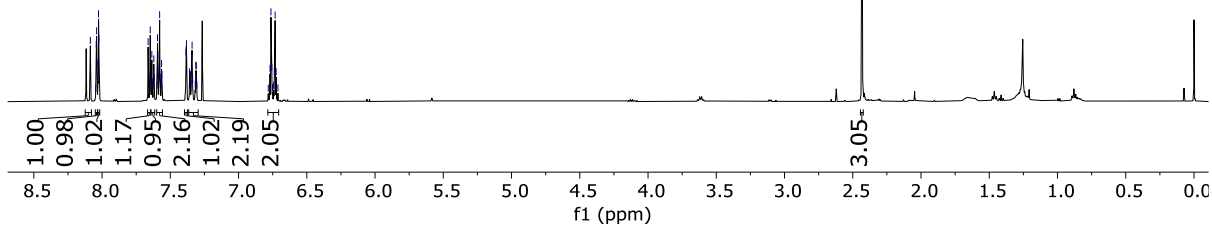

MCHSE-S508 13C.1.fid  
MCHSE-S508 19F

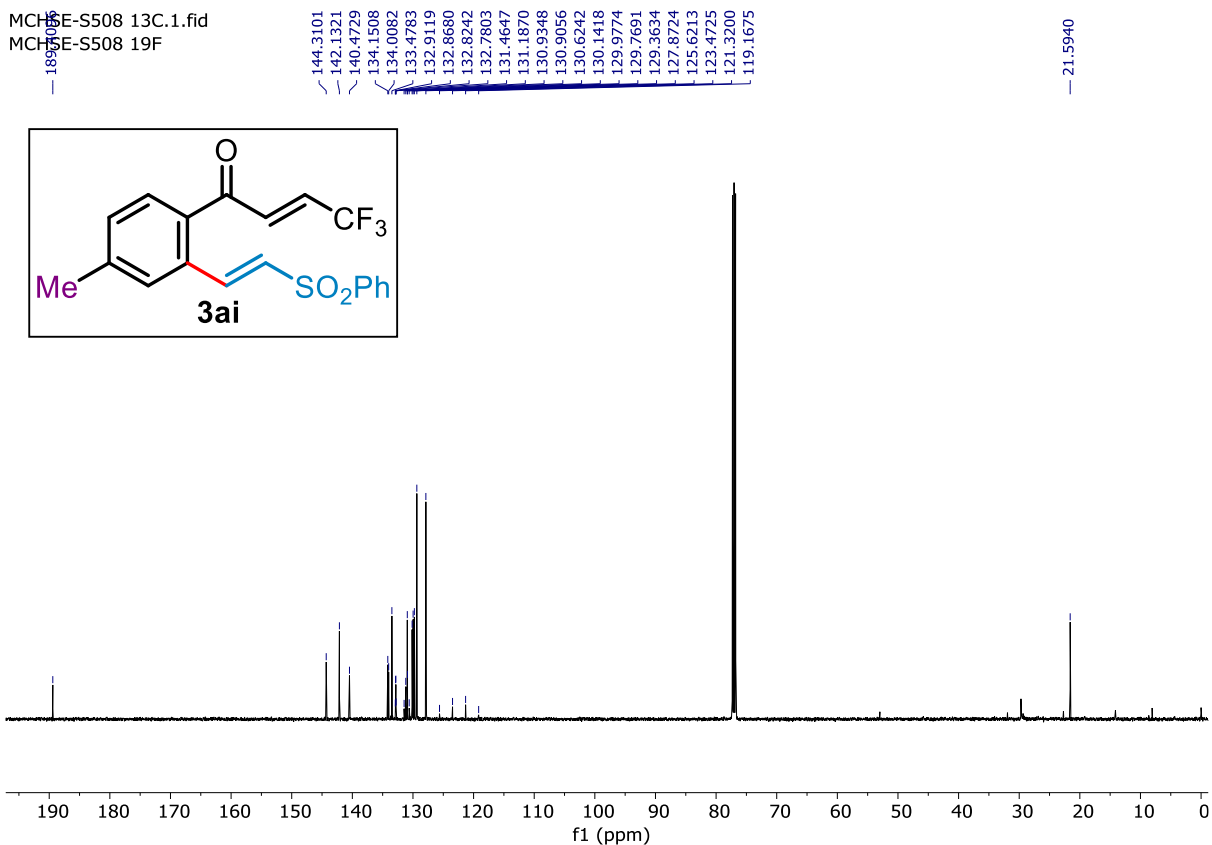

MCHSE-S508 19F.1.fid  
MCHSE-S508 19F

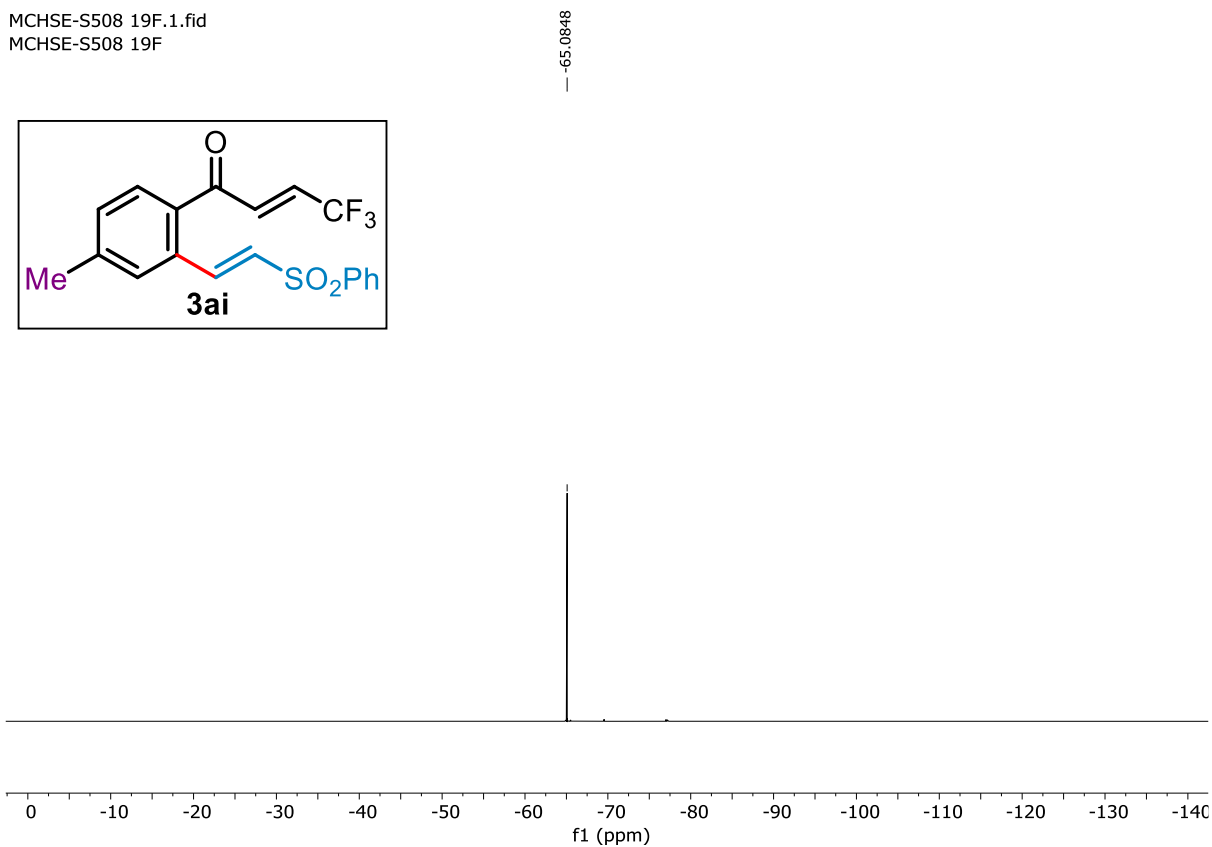

MCHSE-SS 107  
MCHSE-SS 107

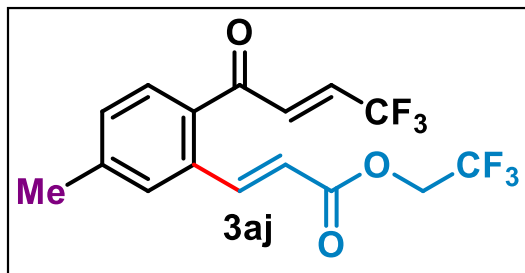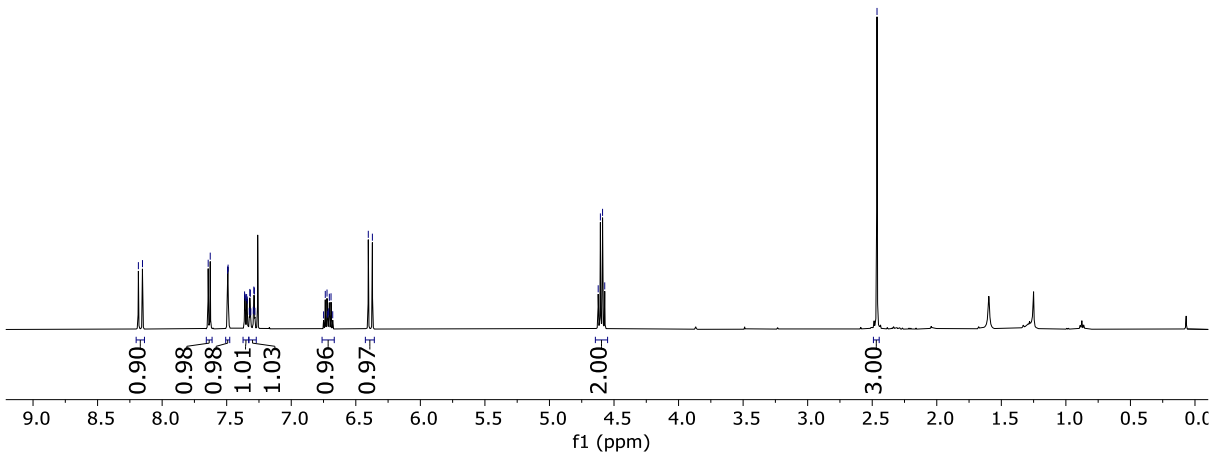

MCHSE-SS 107 13C.1  
MCHSE-SS 107 13C

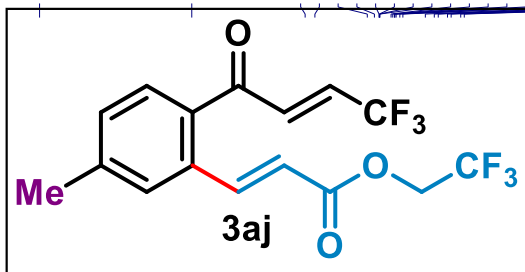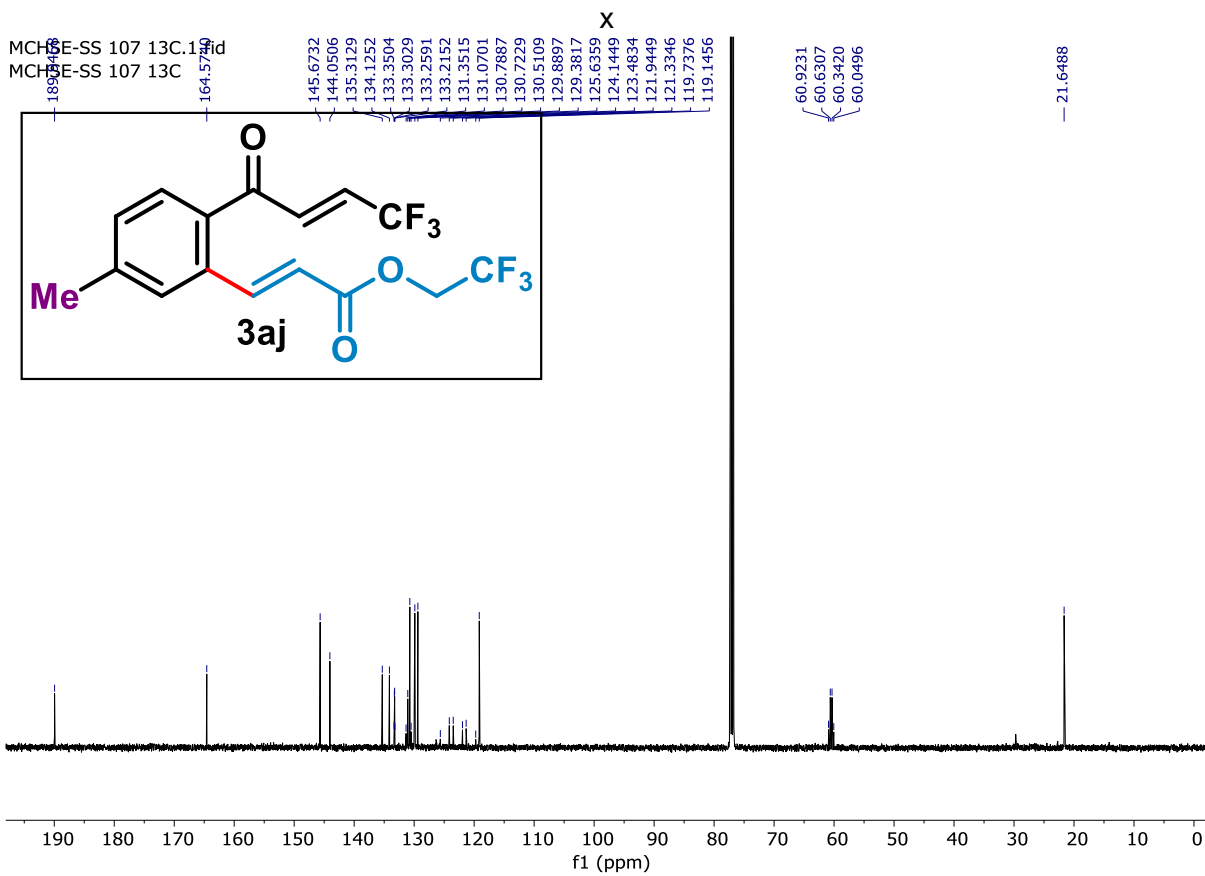

MCHSE-SS 107 19F.1.fid  
MCHSE-SS 107 19F

— -65.1438

— -73.7008

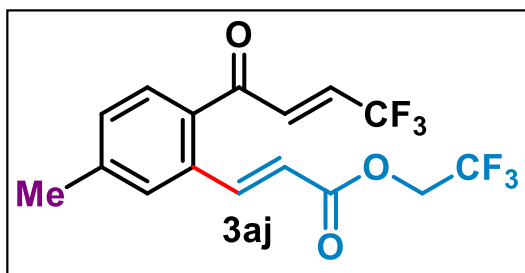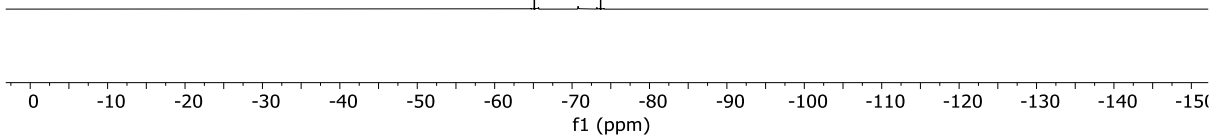

MCHSE-SS 107 19F.1.fid  
MCHSE-SS 107 19F

— 2.5012

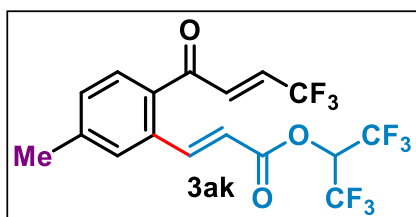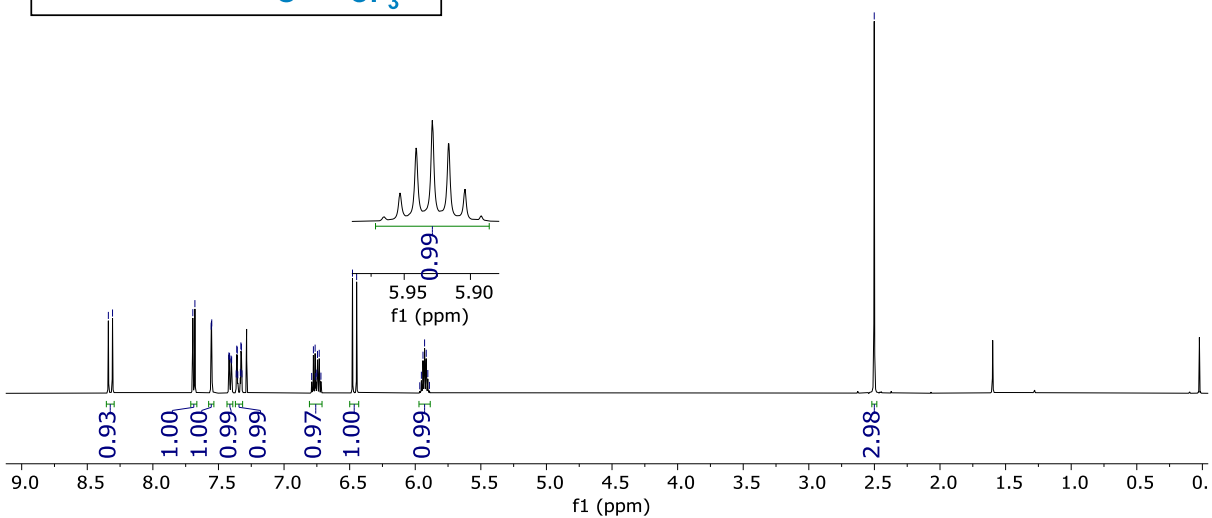

MCHSE-SS20 13C.1.fid  
MCHSE-SS20 13C

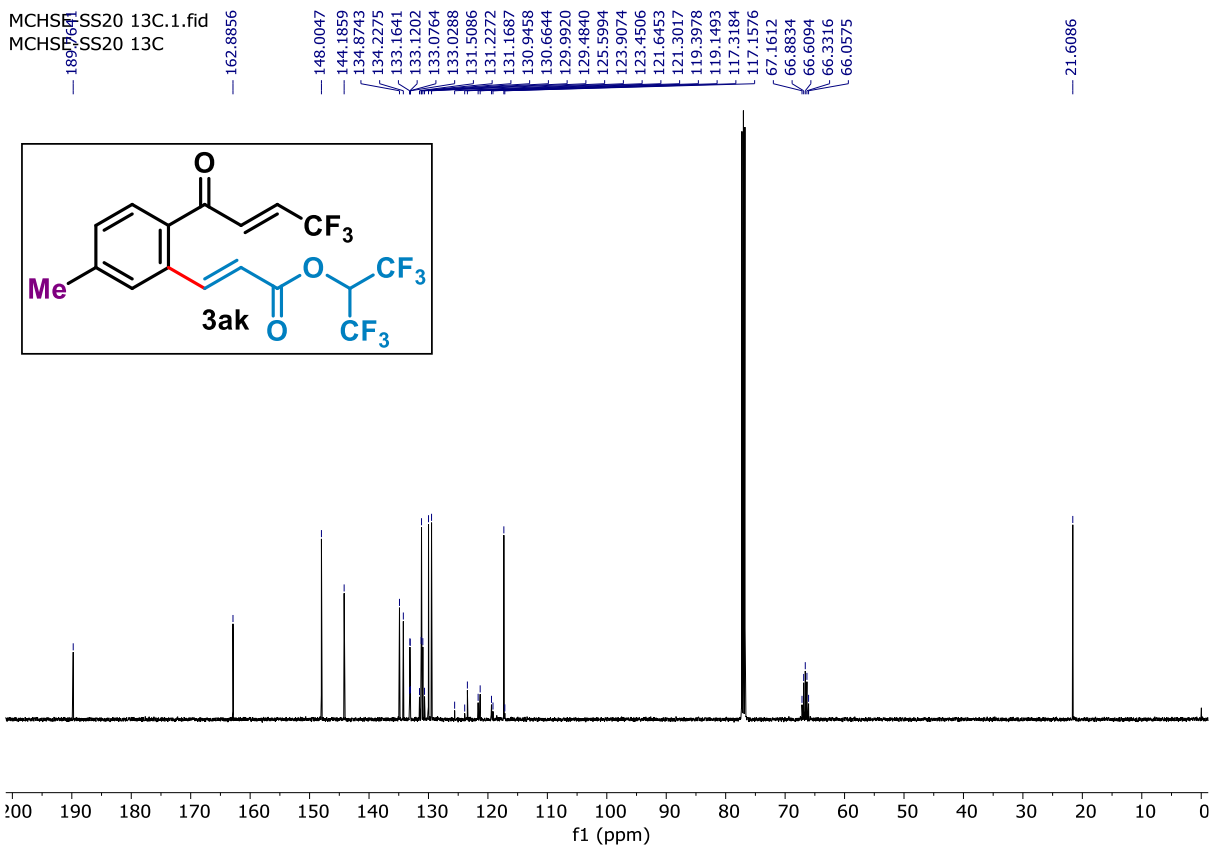

MCHSE-SS20 19F.1.fid  
MCHSE-SS20 19F

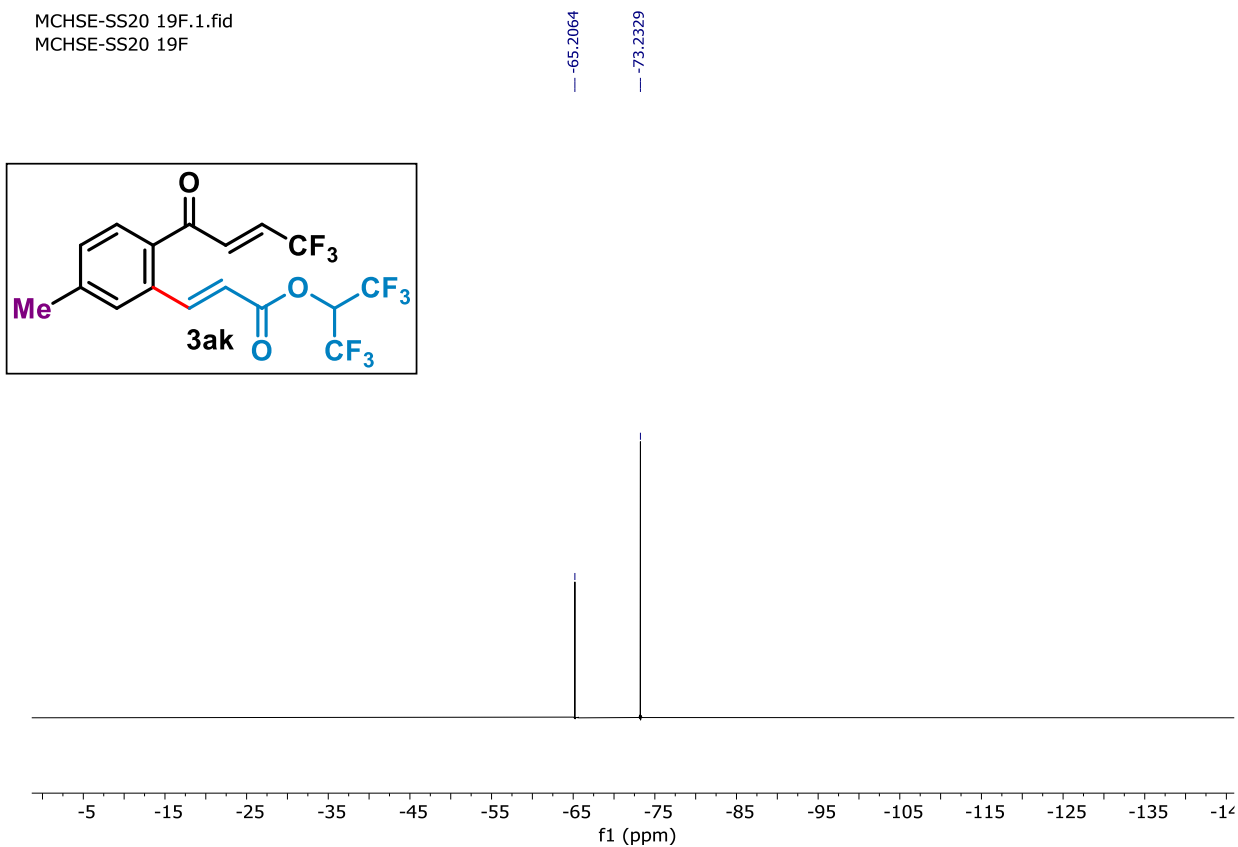



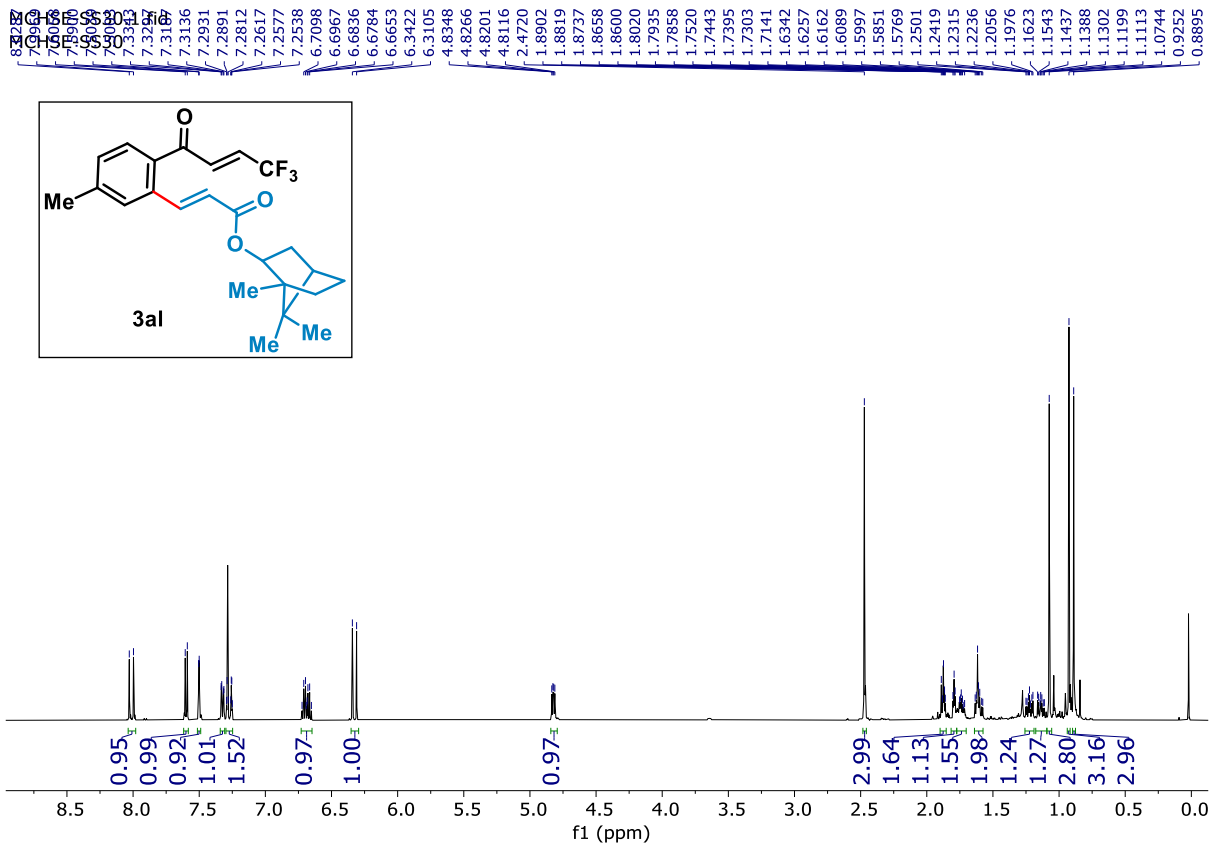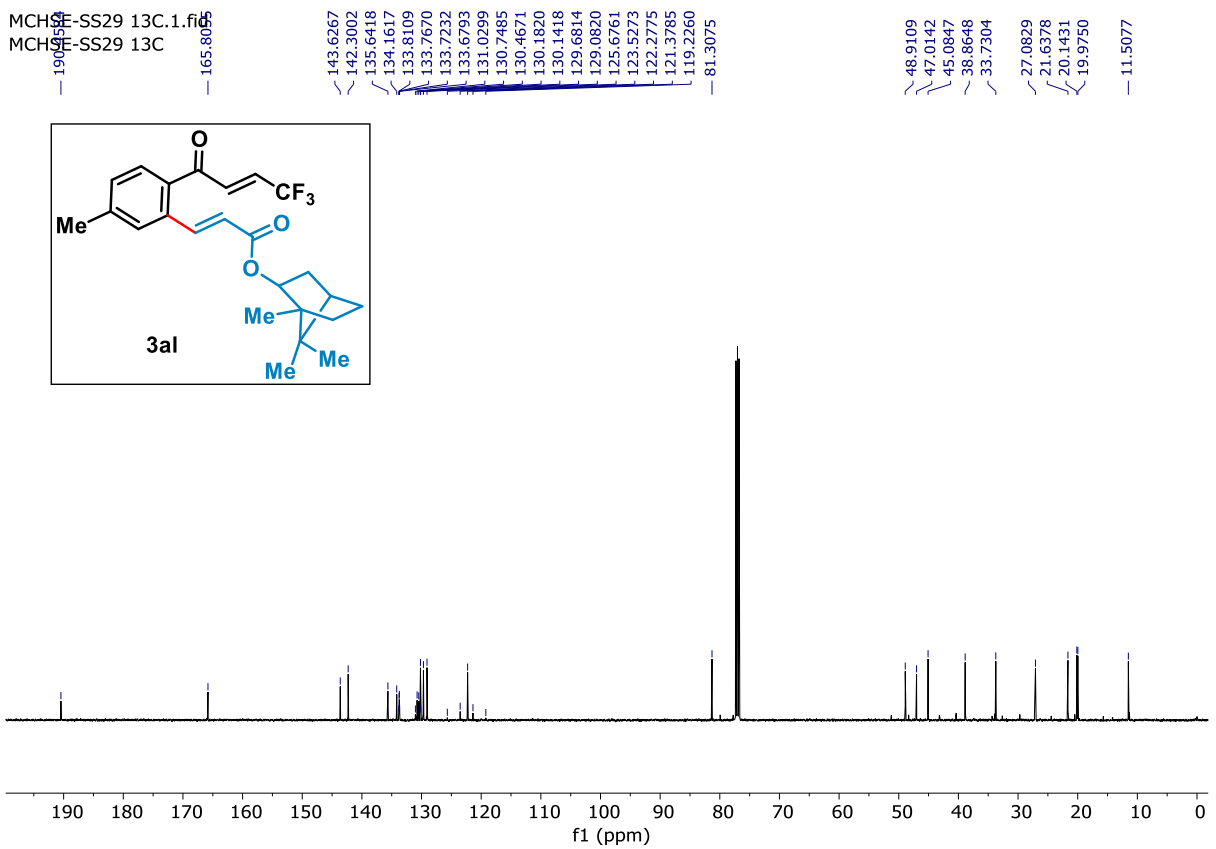

MCHSE-SS29 19F.1.fid  
MCHSE-SS29 19F

-65.0719

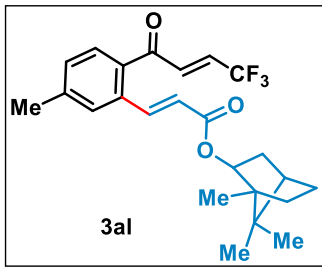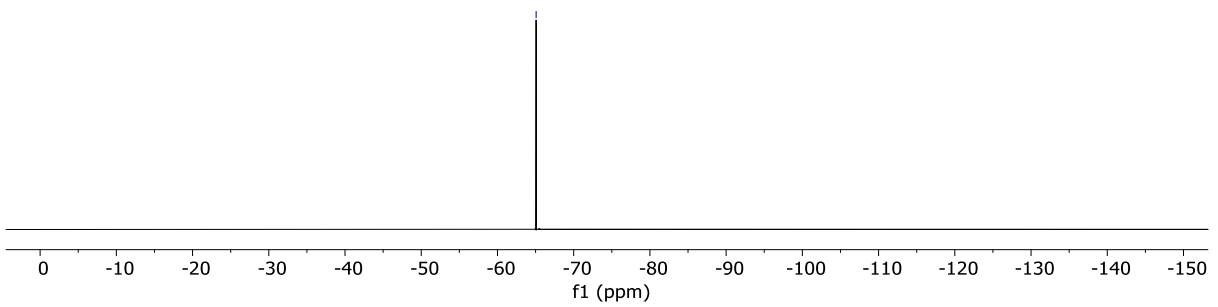

82.313  
80.014  
78.416  
78.251  
76.498  
75.311  
75.103  
75.068  
73.545  
73.476  
73.430  
73.323  
73.244  
73.204  
73.012  
72.929  
72.890  
72.850  
6.9513  
6.9342  
6.9052  
6.9000  
6.7350  
6.7218  
6.7164  
6.7087  
6.6904  
6.6904  
6.5278  
6.4961  
2.9346  
2.9254  
2.9166  
2.5401  
2.5224  
2.5020  
2.4788  
2.4306  
2.4117  
2.4053  
2.3299  
2.3000  
2.1896  
2.1719  
2.1539  
2.1338  
2.1161  
2.0917  
2.0438  
2.0145  
1.9892  
1.9654  
1.6615  
1.6542  
1.6365  
1.6182  
1.5981  
1.5822  
1.5785  
1.5477  
1.5221  
1.4974  
1.4635  
1.4217  
0.9186

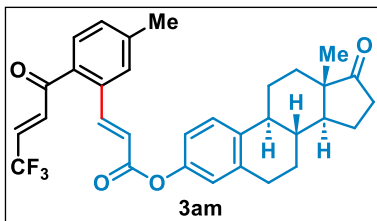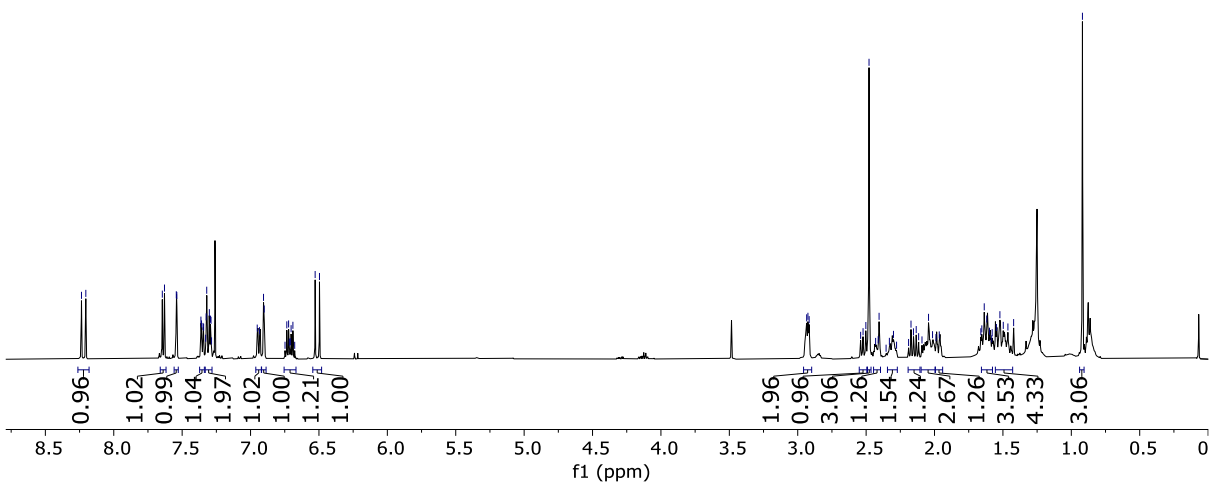

MCHSE-SS103 13C.1.fid  
MCHSE-SS103 13C

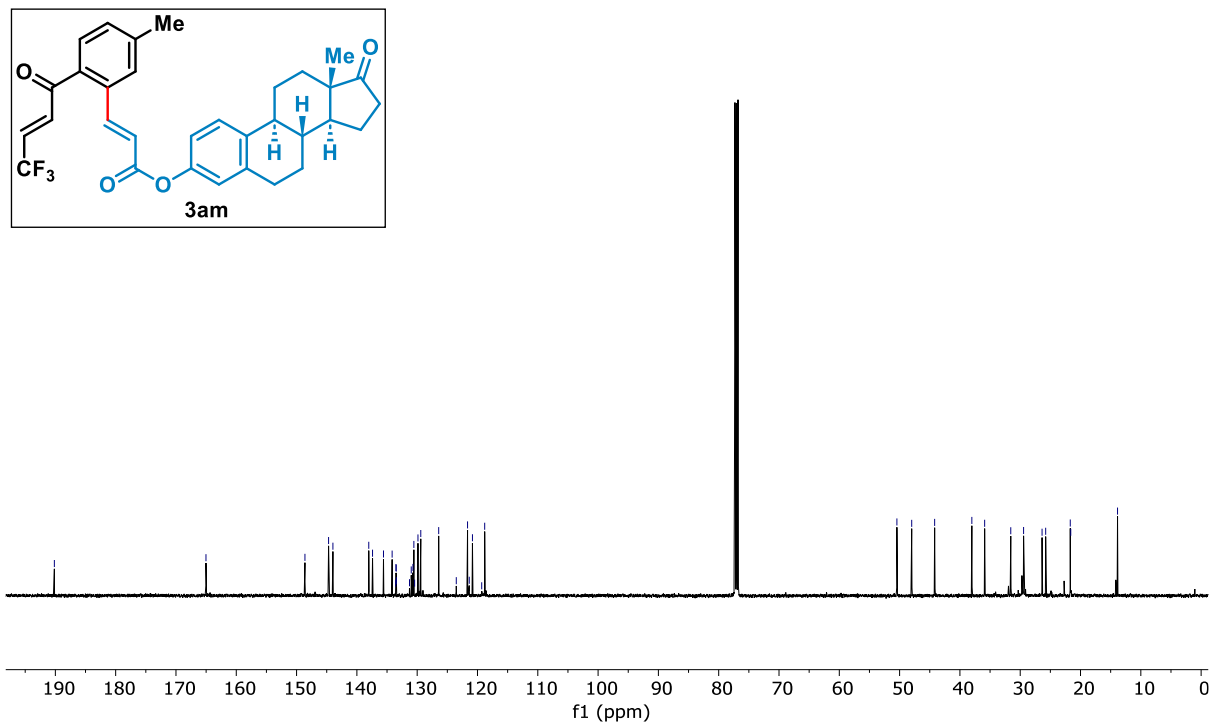

MCHSE-SS103 19F.1.fid  
MCHSE-SS103 19F

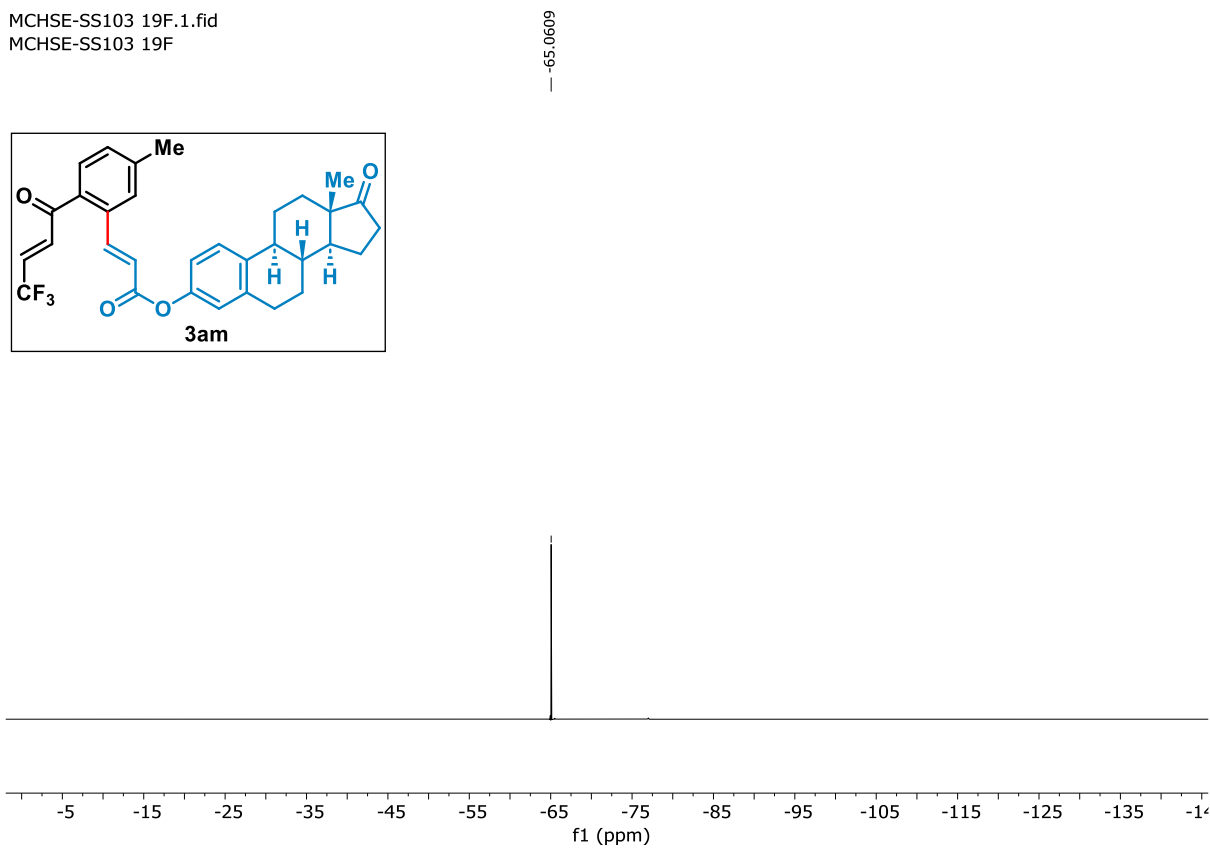

MCSHSE-SS50 1H.1.fid  
MCSHSE-SS50 1H

8.2418  
8.2101  
8.0942  
8.0750  
7.9139  
7.8980  
7.8321  
7.8068  
7.7897  
7.6567  
7.6524  
7.6482  
7.6439  
7.6253  
7.6210  
7.6167  
7.6125  
7.4685  
7.4645  
7.4523  
7.4483  
7.3650  
7.3605  
7.2494  
7.2448  
7.2326  
7.2281  
6.9779  
6.9642  
6.9501  
6.9364  
6.9328  
6.9187  
6.9047  
6.8110  
6.7793  
6.4974  
6.4782

2.5000 DMSO-d6  
2.4359

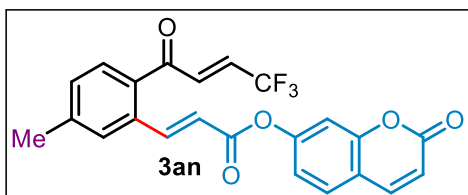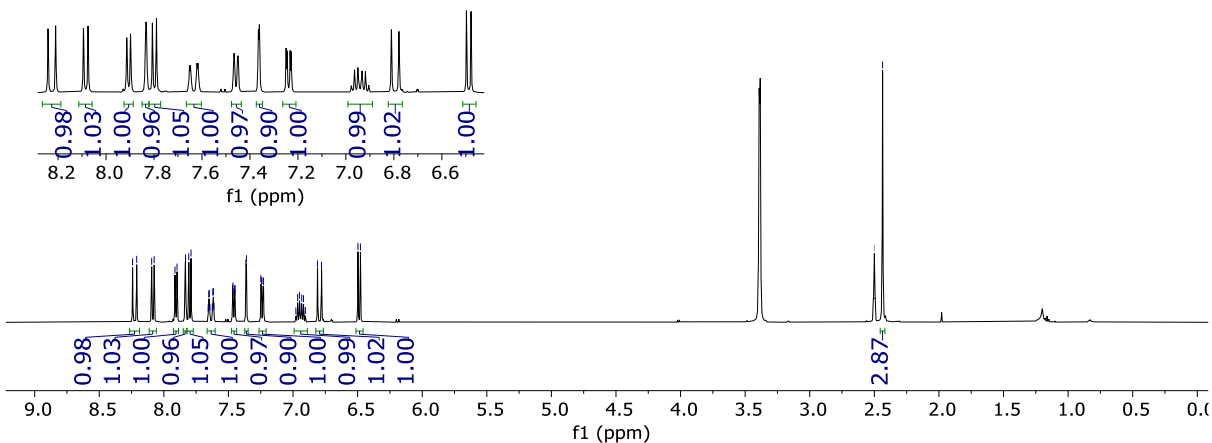

MCSHSE-SS50 13C.1.fid  
MCSHSE-SS50 13C

195.9914  
169.4819  
164.9504  
159.3445  
157.9996  
151.1220  
149.0499  
149.0207  
140.2062  
140.1587  
140.1112  
139.5228  
139.0769  
136.1388  
135.9561  
134.6405  
134.4139  
134.1471  
133.8767  
133.6062  
131.3917  
129.2428  
127.0904  
124.9452  
124.1778  
123.8452  
121.9924  
120.8267  
115.3487  
26.2534

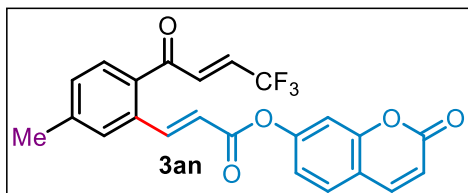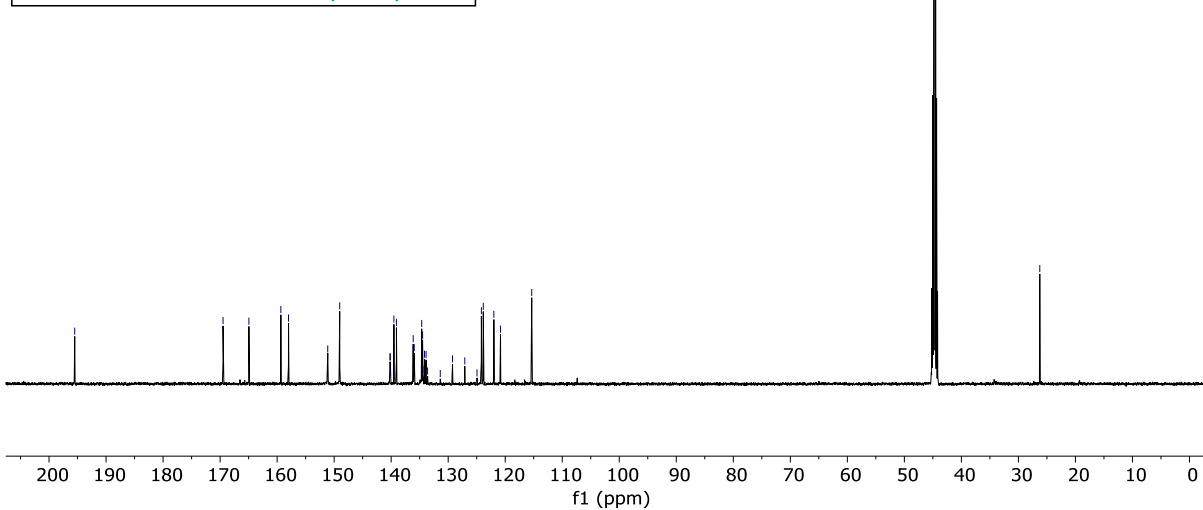

MCHSE-SS 136 19F.1.fid  
MCHSE-SS 136 19F

— -65.0811

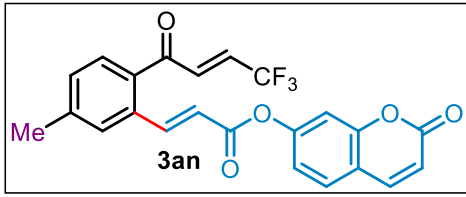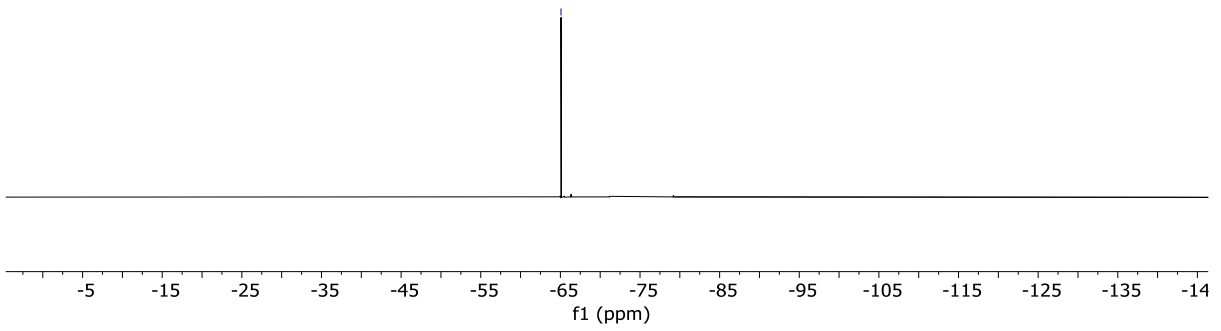

MCHSE-SS14.1.fid  
MCHSE-SS14

7.8111  
7.8053  
7.7992  
7.7932  
7.7872  
7.6543  
7.6483  
7.3437  
7.3394  
7.3342  
7.3302  
7.3101  
7.3062  
7.3022  
7.2982  
7.2790  
7.2751  
7.2711  
6.7338  
6.7297  
6.7257  
6.7094  
6.6945  
6.6893  
6.6762  
6.6631

4.4436  
4.4293  
4.4150

3.1397  
3.1336  
3.1254  
3.1193  
3.1110  
3.1049

— 2.4698

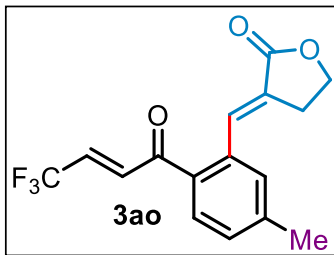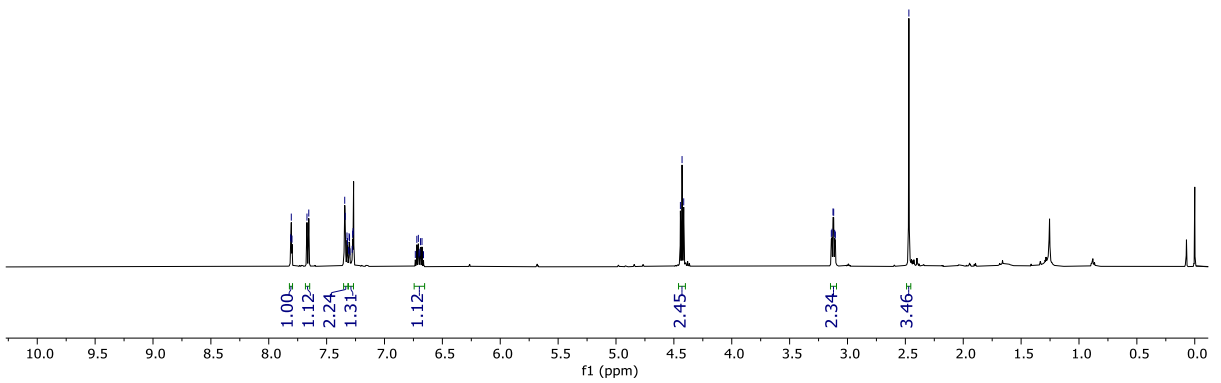

MCHSE-SS14 13C.1.fid  
MCHSE-SS14

188.5317  
171.5065

143.5719  
135.5796  
135.2946  
134.5454  
133.2810  
133.2371  
133.1933  
132.9617  
131.2657  
131.0079  
130.7265  
130.4452  
130.1565  
128.9226  
128.7748  
123.2782  
123.4834  
121.3346

65.5021

27.1048  
21.7547

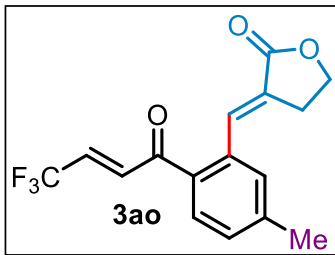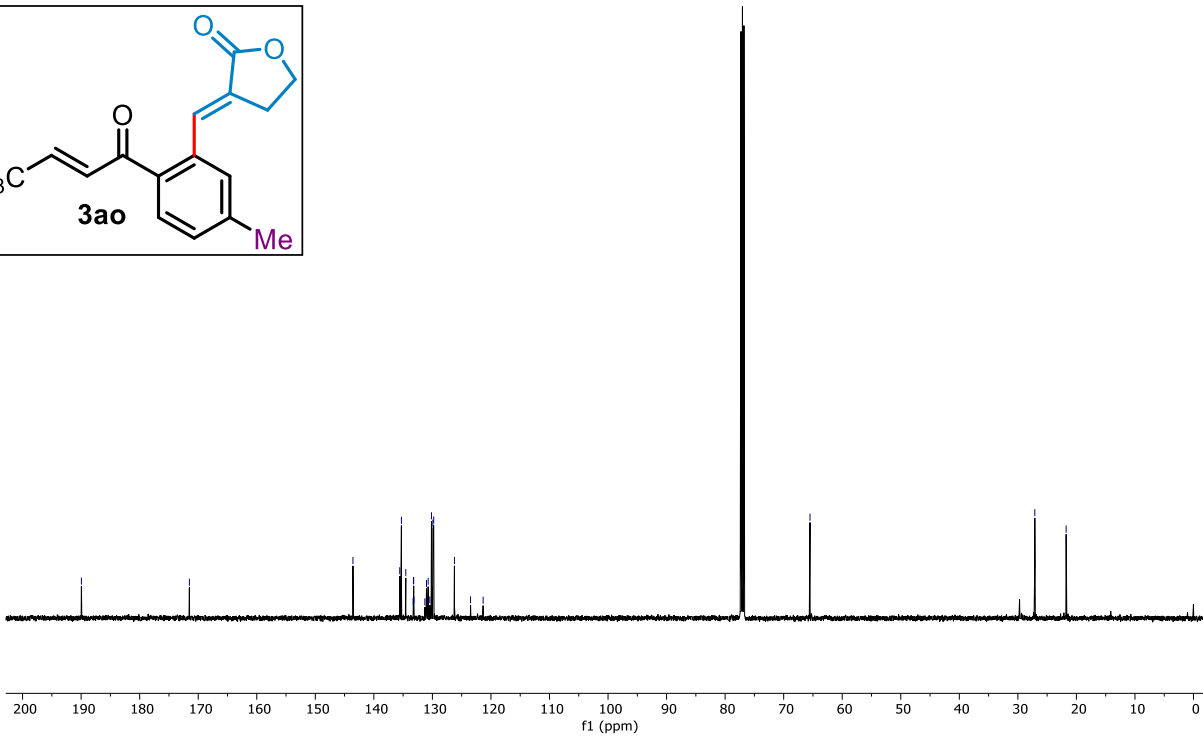

MCHSE-SS14 19F.1.fid  
MCHSE-SS14

-65.0959

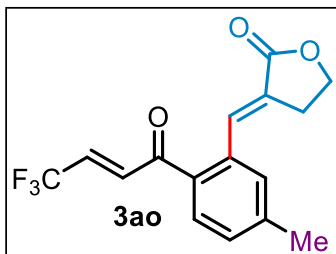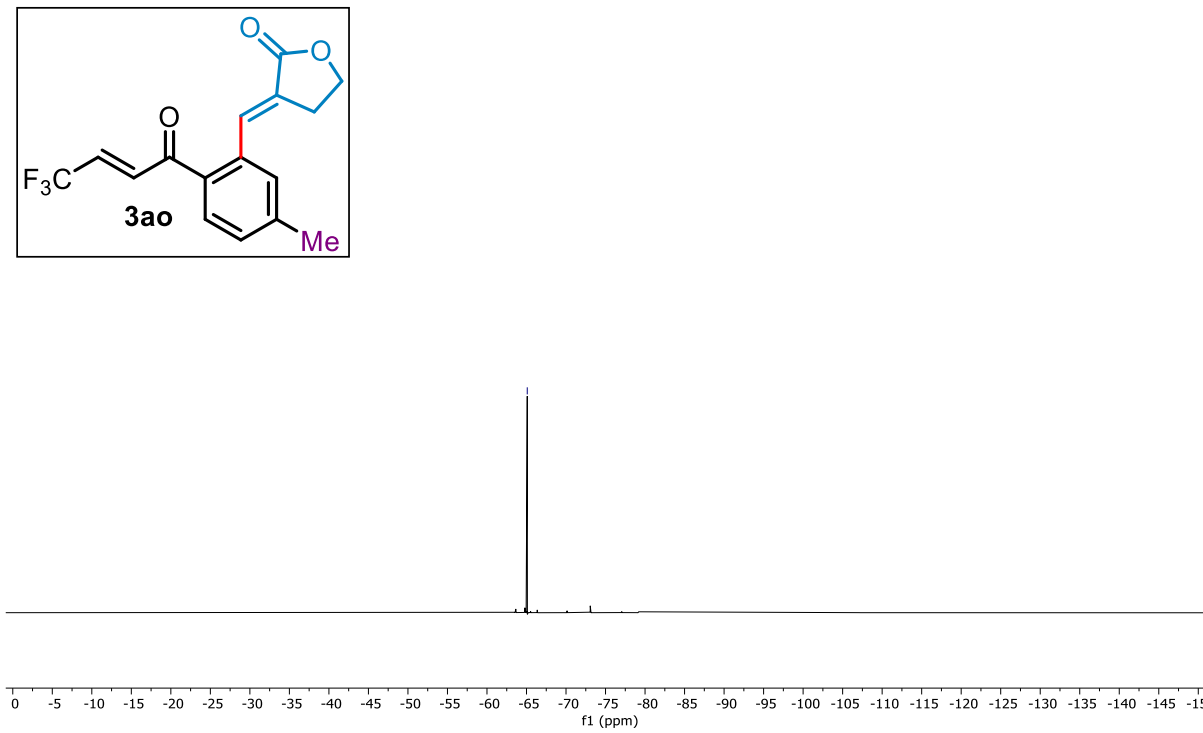

MCHSE-SS 14 R R 1D NOE.2.fid  
 MCHSE-SS 14 R R 1D NOE

7.8310  
 7.8249  
 7.8188

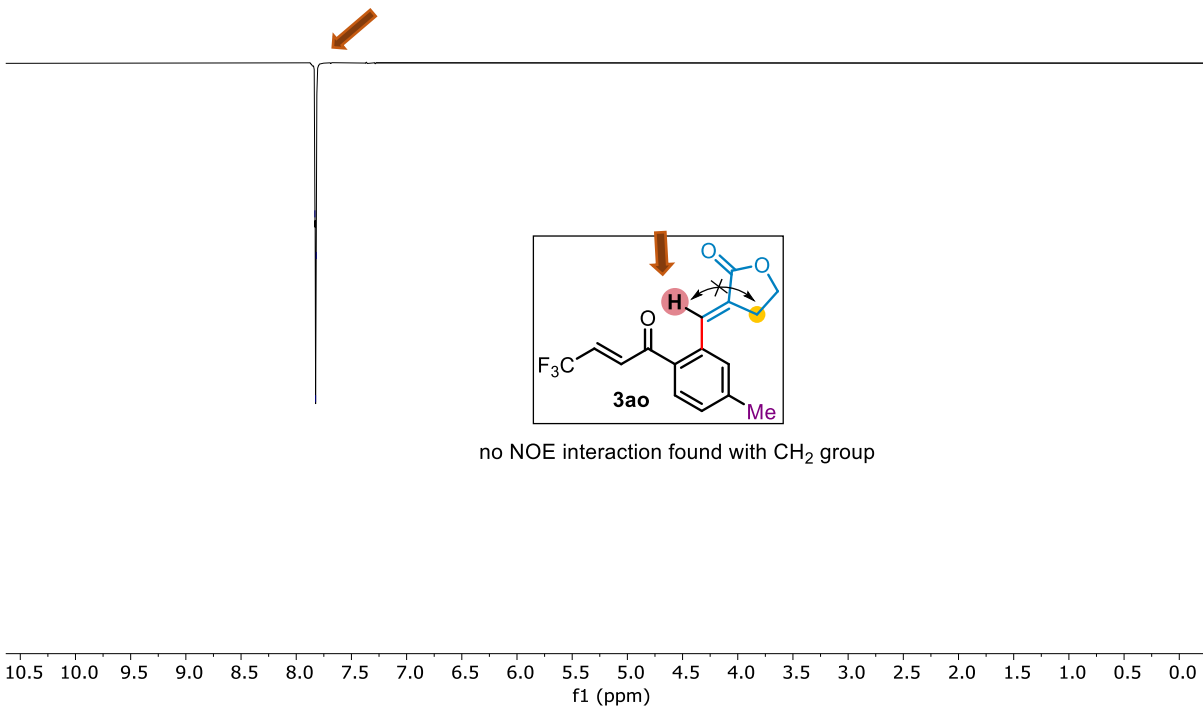

MCHSE-SS122 1H.1.fid  
 MCHSE-SS122 1H

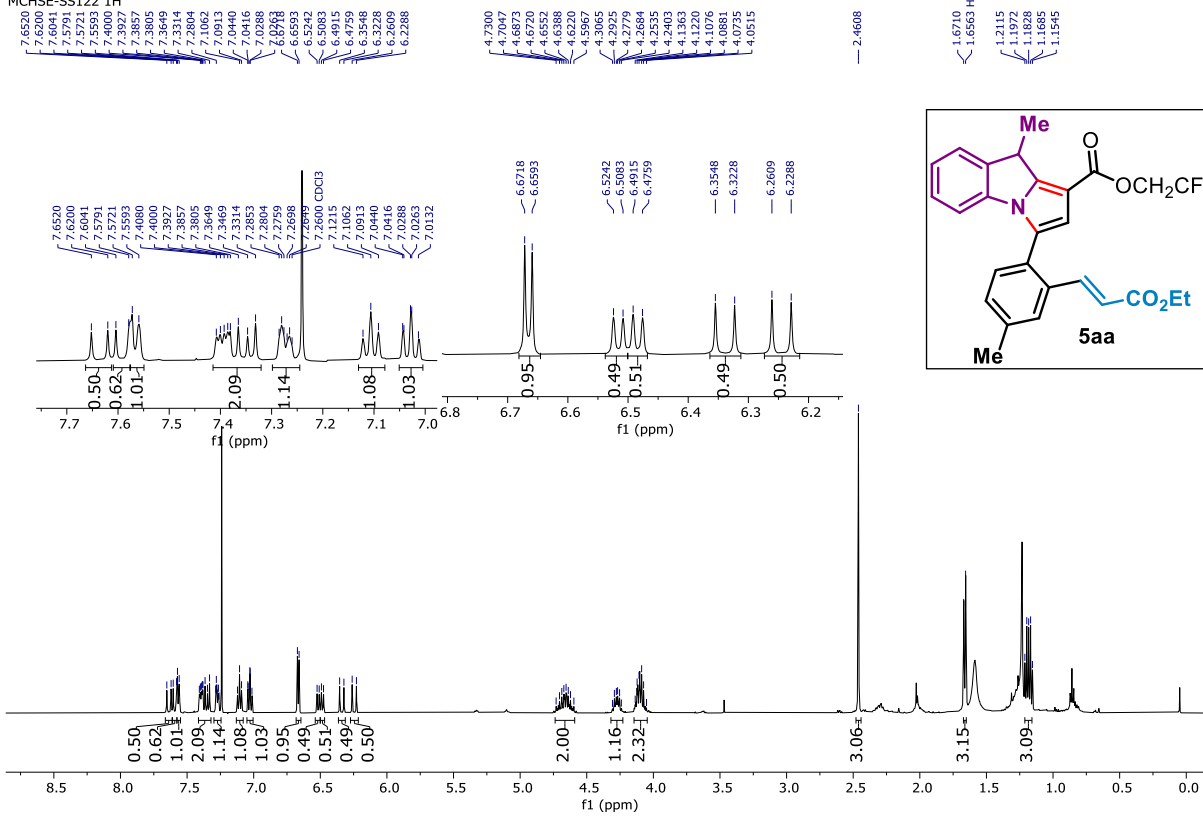

MCHSE-SS122 13C.1.fid  
MCHSE-SS122 13C

166.608  
162.6079  
148.3154  
142.2673  
140.679  
140.9274  
139.4424  
139.2487  
134.5418  
131.7717  
130.7887  
129.232  
128.434  
127.5143  
127.2000  
125.3582  
124.9014  
124.8502  
124.5761  
123.862  
119.7986  
116.2221  
115.8055  
111.9464  
111.9135  
107.5757

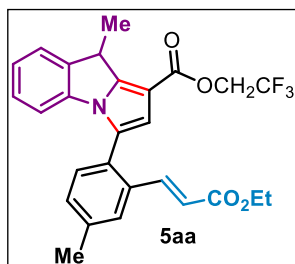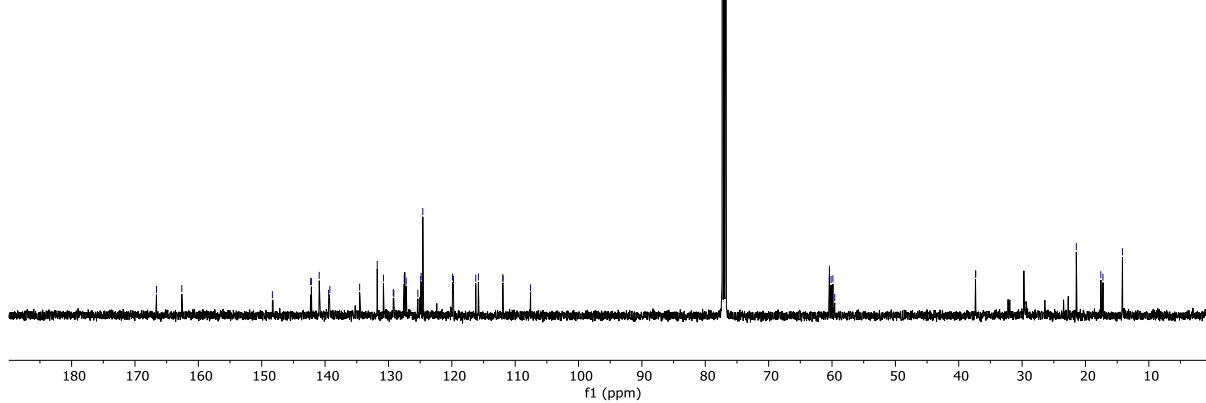

MCHSE-SS122 19F.1.fid  
MCHSE-SS122 19F

73.4263  
73.4631

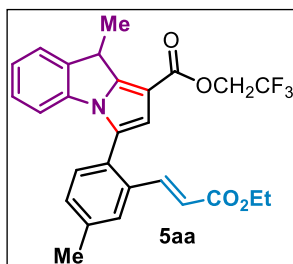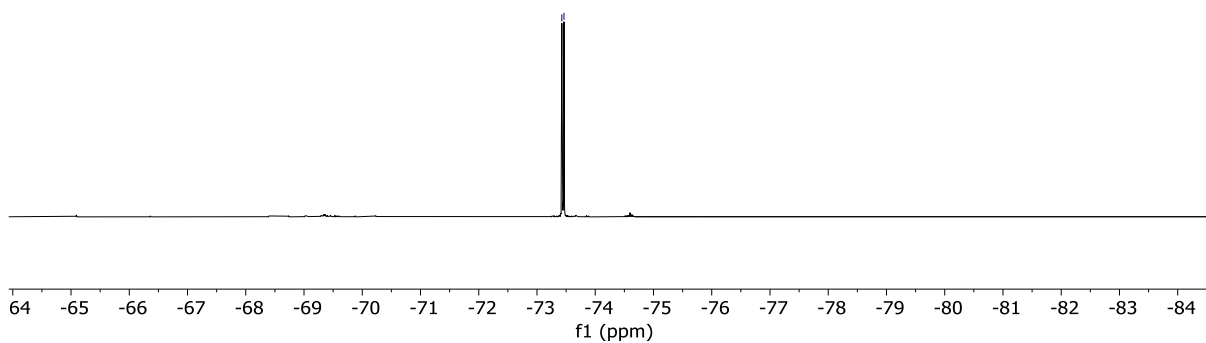



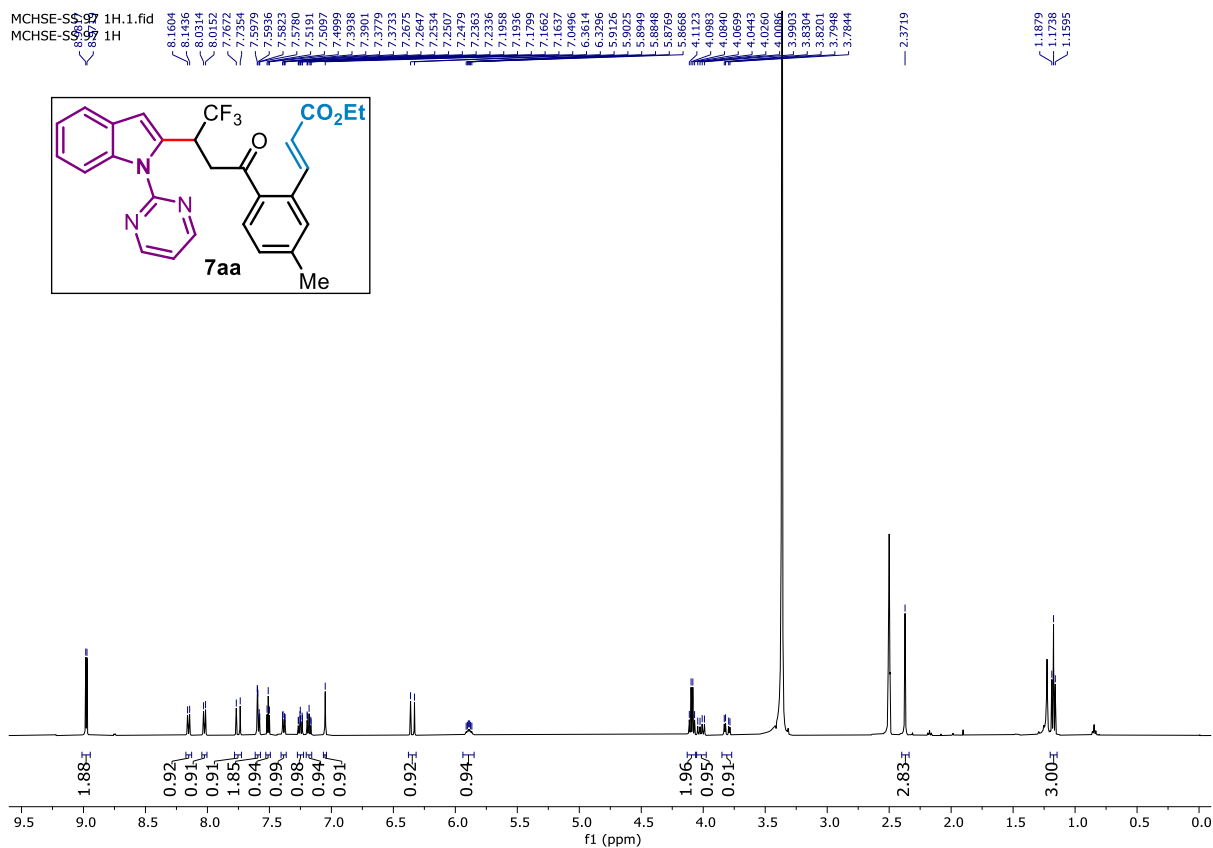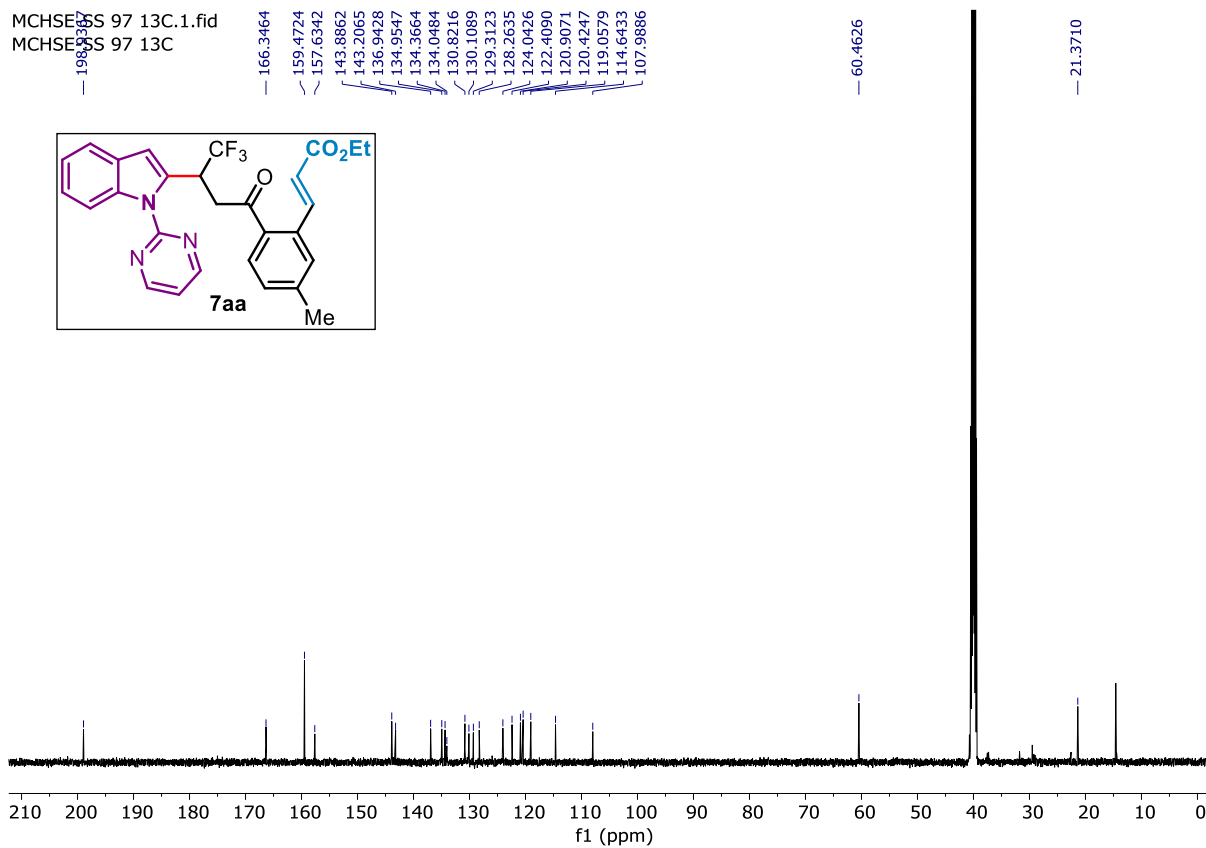

MCHSE-SS 97 19F.1.fid  
MCHSE-SS 97 19F

-68.1889

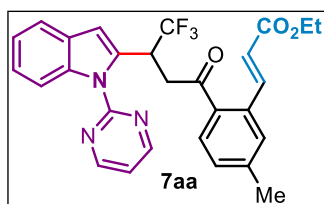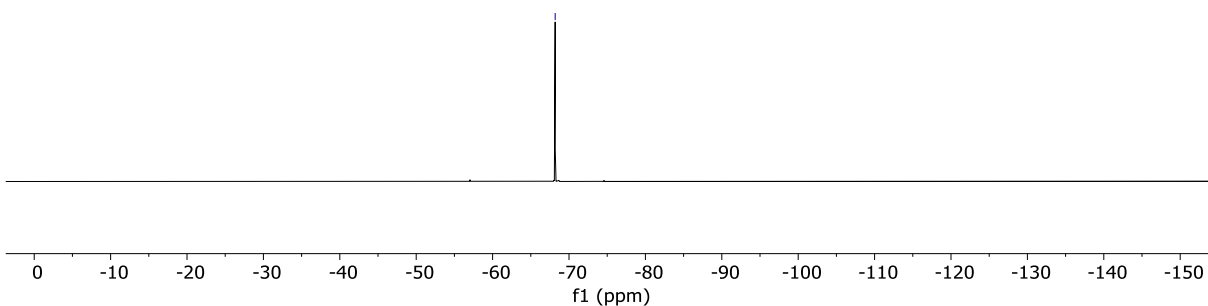

MCHSE-SS 97 19F.1.fid  
MCHSE-SS 97 19F

-2.4704

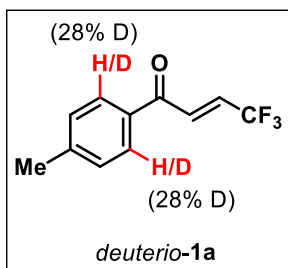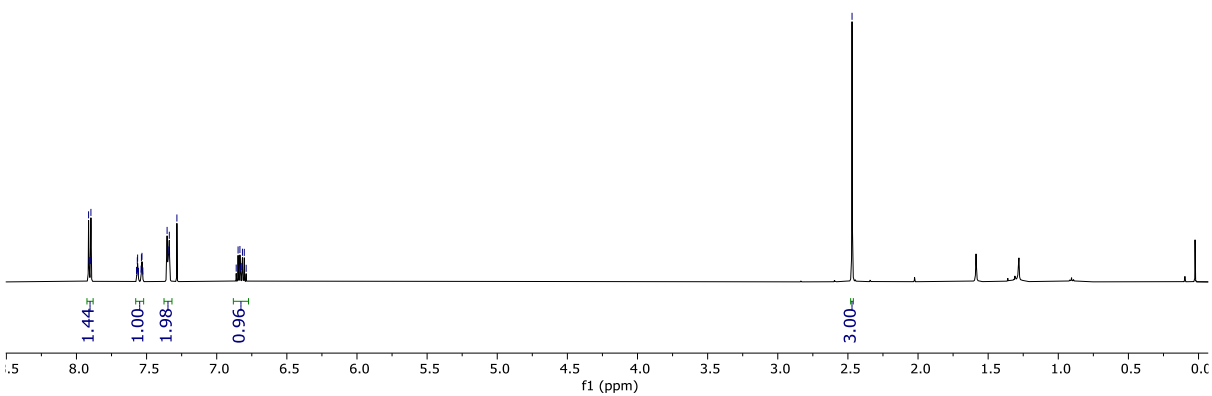

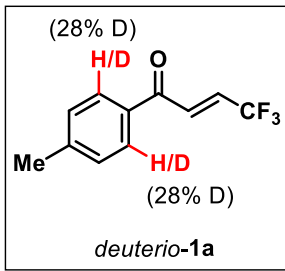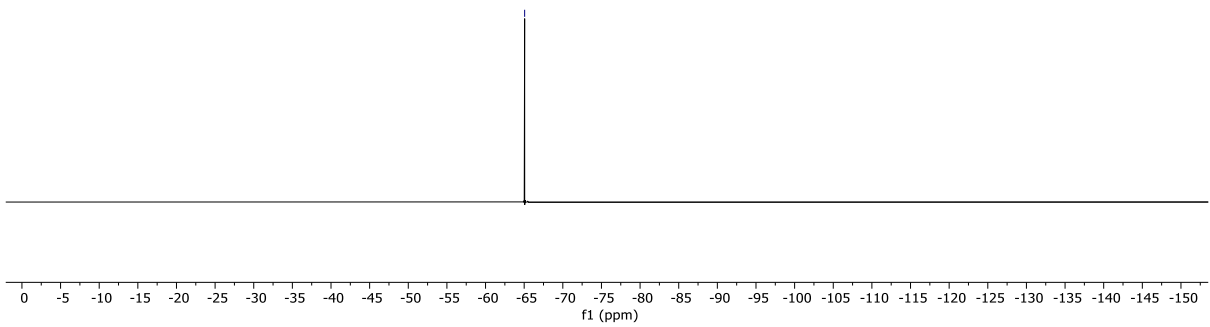

7.0461  
7.0167  
7.0165  
7.0163  
7.0161  
7.0159  
7.0157  
7.0155  
7.0153  
7.0151  
7.0149  
7.0147  
7.0145  
7.0143  
7.0141  
7.0139  
7.0137  
7.0135  
7.0133  
7.0131  
7.0129  
7.0127  
7.0125  
7.0123  
7.0121  
7.0119  
7.0117  
7.0115  
7.0113  
7.0111  
7.0109  
7.0107  
7.0105  
7.0103  
7.0101  
7.0099  
7.0097  
7.0095  
7.0093  
7.0091  
7.0089  
7.0087  
7.0085  
7.0083  
7.0081  
7.0079  
7.0077  
7.0075  
7.0073  
7.0071  
7.0069  
7.0067  
7.0065  
7.0063  
7.0061  
7.0059  
7.0057  
7.0055  
7.0053  
7.0051  
7.0049  
7.0047  
7.0045  
7.0043  
7.0041  
7.0039  
7.0037  
7.0035  
7.0033  
7.0031  
7.0029  
7.0027  
7.0025  
7.0023  
7.0021  
7.0019  
7.0017  
7.0015  
7.0013  
7.0011  
7.0009  
7.0007  
7.0005  
7.0003  
7.0001  
2.1588  
2.1555

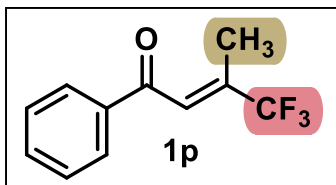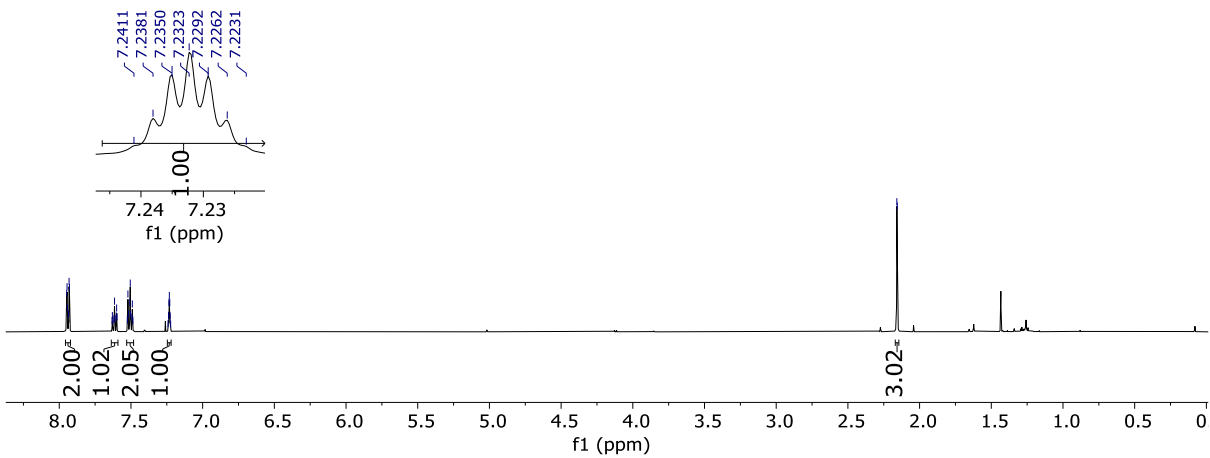

MCHSE-SS 141 13C.1.fid  
MCHSE-SS 141 13C

191.12899  
139.7029  
139.4617  
139.2206  
138.9830  
137.3056  
133.9545  
129.0247  
128.7067  
126.8320  
125.9988  
125.9586  
125.9147  
125.8709  
124.6539  
122.4722  
120.2942

12.9450

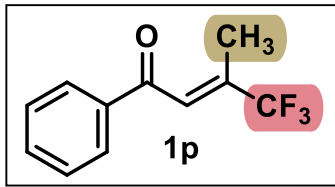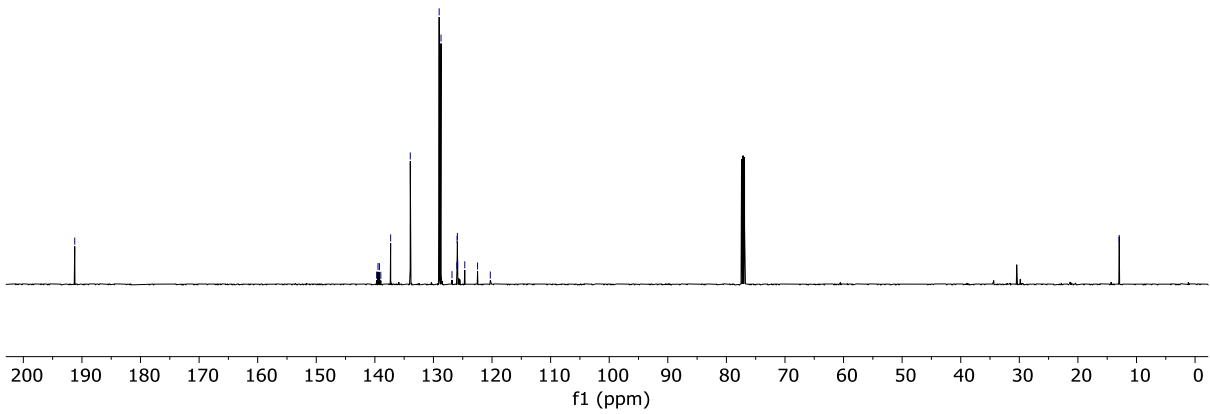

MCHSE-SS 141 19F.1.fid  
MCHSE-SS 141 19F

-70.8638

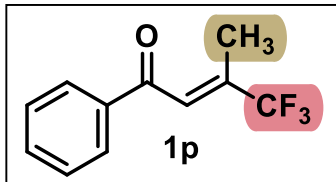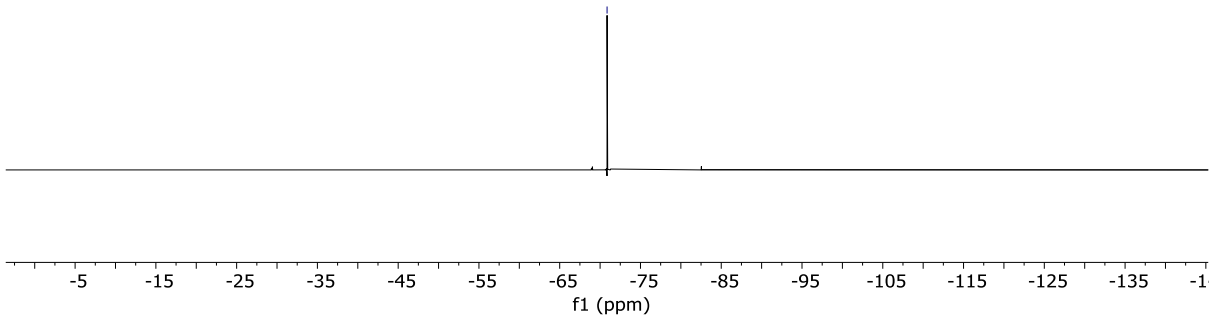

MCH-E-SS 144 13C.1.fid  
MCH-E-SS 144 13C

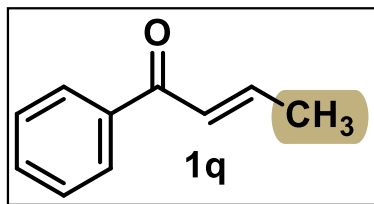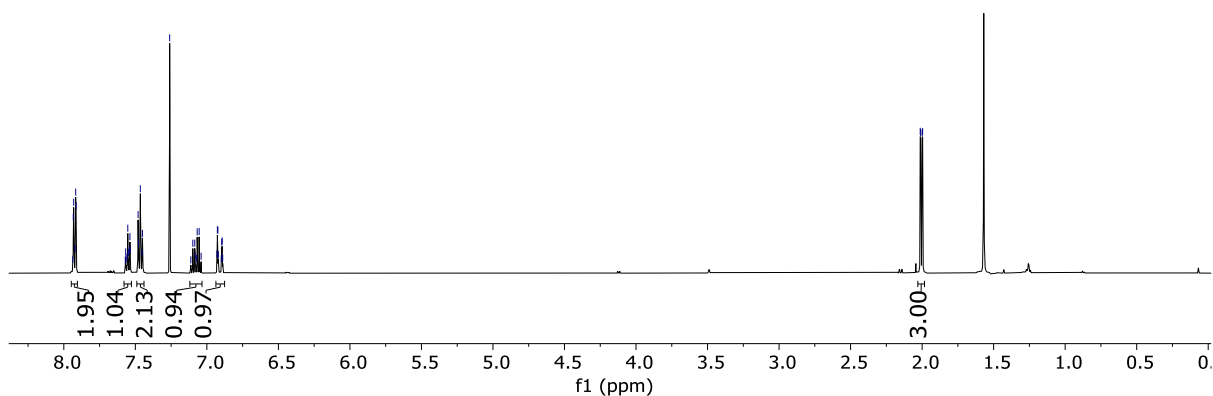

MCH-E-SS 144 13C.1.fid  
MCH-E-SS 144 13C

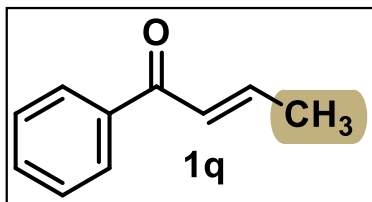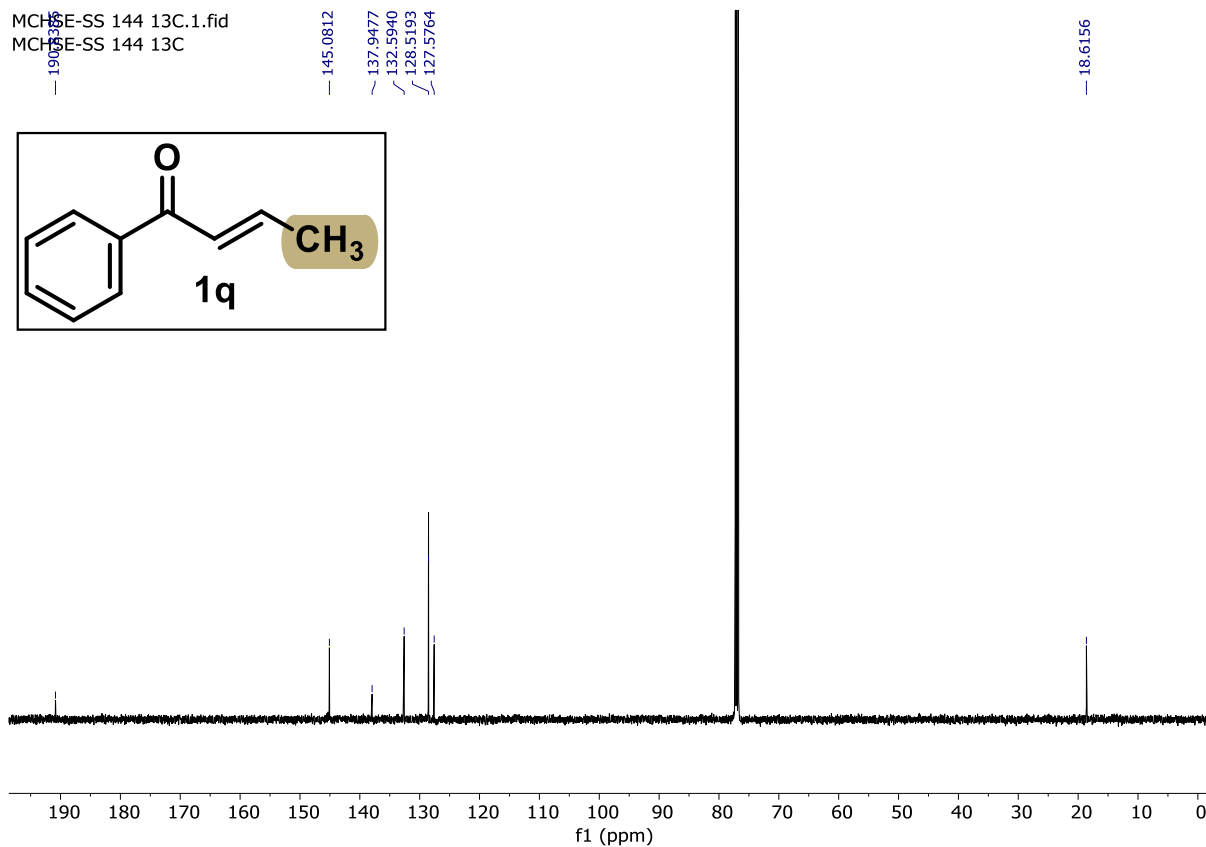

Supplement: d3ob02024j1.pdf [file d3ob02024j1.pdf]
